# Supplementary material for: Unprecedented 1,3-migration of the aryl ligand in metallacyclic aryl α-naphthyl Pt(iv) difluorides to produce β-arylnaphthyl Pt(ii) complexes
Source: Royal Society of Chemistry journal article supplement (doi:10.1039/c3cc41079j), 2013-01-01
Supplement: c3cc41079j.pdf [file c3cc41079j.pdf]

## Supporting Information

# Unprecedented 1,3-migration of aryl ligand in metallacyclic aryl $\alpha$ -naphthyl $\text{Pt}^{\text{IV}}$ difluorides to produce $\beta$ -arylnaphthyl $\text{Pt}^{\text{II}}$ complexes

Ina S. Dubinsky-Davidchik,<sup>a</sup> Israel Goldberg,<sup>a</sup> Arkadi Vigalok<sup>\*a</sup> and Andrei N. Vedernikov<sup>\*b</sup>

<sup>a</sup>- School of Chemistry, The Sackler Faculty of Exact Sciences, Tel Aviv University, Tel Aviv 69978, Israel. Email: avigal@post.tau.ac.il; <sup>b</sup>- Department of Chemistry and Biochemistry, University of Maryland, College Park, MD 20742, USA. Email: avederni@umd.edu.

## General procedures:

All operations with air- and moisture- sensitive compounds were performed in a nitrogen-filled Innovative Technology glove box. All solvents were degassed and stored under high-purity nitrogen over activated 4Å molecular sieves. All deuterated solvents were stored under high-purity nitrogen on 3Å molecular sieves. Commercially available reagents (Aldrich and Strem) were used as received. The NMR spectra were recorded on Bruker AC 200MHz and Bruker AMX 400MHz spectrometers.  $^1\text{H}$  and  $^{13}\text{C}$  NMR signals are reported in ppm downfield from TMS.  $^1\text{H}$  signals are referenced to the residual proton of a deuterated solvent 7.26 ppm for  $\text{CDCl}_3$ , 1.94 ppm for  $\text{CD}_3\text{CN}$ .  $^{13}\text{C}$  NMR signals are referenced to the solvent signal:  $\text{CDCl}_3$  at 77.36 ppm,  $\text{CD}_3\text{CN}$  at 1.32 ppm.  $^{31}\text{P}$  chemical shifts are reported in ppm downfield from  $\text{H}_3\text{PO}_3$  and referenced to an external 85% phosphoric acid sample.  $^{19}\text{F}$  chemical shifts are reported in ppm downfield from  $\text{CClF}_3$ . All measurements were performed at 22 °C in  $\text{CDCl}_3$  unless stated otherwise. Elemental analysis was performed in the laboratory for microanalysis at the Hebrew University of Jerusalem. Mass Spectra were recorded on a VG-Autospec M-250 instrument.

**Computational details.** Theoretical calculations in this work have been performed using density functional theory (DFT) method,<sup>1</sup> specifically functional PBE,<sup>2</sup> and LACVP relativistic basis set with two polarization functions implemented in the Jaguar program<sup>3</sup> package. Full geometry optimization has been performed without constraints on symmetry. For all species under investigation frequency analysis has been carried out. All energy minima have been checked for the absence of imaginary frequencies. All transition states possessed just one imaginary frequency. Using the method of Intrinsic Reaction Coordinate, reactants, products and the corresponding transition states were proven to be connected by a single minimal energy reaction path.

The solvation of all complexes in Scheme 6 in MeCN solvent was modeled using a Poisson-Boltzmann continuum solvation model (PBF).<sup>3</sup> For MeCN and pyridine experimentally determined solvation Gibbs energies in MeCN solvent were used instead of calculated values, -1.3 kcal/mol for MeCN (determined as  $RT\ln(P_{298}, \text{ mm Hg}/760, \text{ mm Hg})$  where  $P_{298} = 90 \text{ mm Hg}^4$ ) and -1.7 kcal/mol for pyridine.<sup>5</sup>

## Synthesis of 1.<sup>6</sup>

In a Shlenck flask, 200 mg (1.1 mmol) of chloro-di-tert-butylphosphine, 2.2 mg (0.022 mmol, 2 mol%) of copper(I) chloride and 1.4 ml of tetrahydrofuran were placed. A solution of 2-methyl-1-naphthylmagnesium

bromide, 0.25M in tetrahydrofuran, 6.6 ml (1.5 equiv.) was added at room temperature and the mixture was stirred for 20 min. The resulting yellow mixture was heated at 80°C for 6 h. The formation of the product and the disappearance of the chloro-di-tert-butylphosphine were monitored by the  $^{31}\text{P}$  NMR spectroscopy. After the completion, 6 ml of toluene and 6 ml of saturated ammonium chloride aqueous solution were added to the reaction mixture under  $\text{N}_2$  atmosphere. The organic layer was separated, washed again with aq.  $\text{NH}_4\text{Cl}$  and dried over anhydrous  $\text{MgSO}_4$ . The solvent was evaporated to give a yellow oily material in a 80% yield.

$^1\text{H}$  NMR: 8.35 (1H, d,  $J_{\text{HH}}= 8.45$  Hz, Ar), 7.79 (1H, br-d,  $J_{\text{HH}}= 8.17$  Hz, Ar), 7.74 (1H, d,  $J_{\text{HH}}= 8.35$  Hz, Ar), 7.47 (1H, br-t,  $J_{\text{HH}}= 7.60$  Hz, Ar), 7.40 (1H, m, Ar), 7.38 (1H, m, Ar), 2.44 (3H, d,  $J_{\text{PH}}= 2.50$  Hz, Me-Ar), 1.32 (18H, d,  $J_{\text{PH}}= 12.73$  Hz,  $^t\text{Bu}$ );  $^{13}\text{C}\{^1\text{H}\}$  147.65 (d,  $J_{\text{PC}}= 37.61$  Hz, Ar), 136.34 (m, Ar), 131.47 (s, Ar), 130.08 (d,  $J_{\text{PC}}= 7.32$  Hz, Ar), 129.90 (s, Ar), 129.71 (s, Ar), 129.21 (d,  $J_{\text{PC}}= 13.16$  Hz, Ar), 128.61 (s, Ar), 124.63 (s, Ar), 124.45 (s, Ar), 34.00 (d,  $J_{\text{PC}}= 29.52$  Hz,  $^t\text{Bu}$ ), 32.16 (d,  $J_{\text{PC}}= 16.86$  Hz,  $^t\text{Bu}$ ), 26.70 (s, Me-Ar);  $^{31}\text{P}\{^1\text{H}\}$  22.5 (s); HRMS ASAP: found for  $\text{C}_{19}\text{H}_{27}\text{P} [\text{M}+\text{H}]^+$  (calc.) 287.1927 (287.1929).

## Synthesis of complex 2

A solution of 343 mg (0.92 mmol) of  $\text{CODPtCl}_2$  in 10 ml of toluene was heated with 1.2 equiv. (1.1 mmol) of **1** in the presence of 1.5 equiv. (0.2 ml) of  $\text{Et}_3\text{N}$  at 100°C for 8 h. The  $^{31}\text{P}$  NMR spectrum of the reaction mixture indicated the disappearance of the free ligand and formation of a new complex. The solution was concentrated by evaporation and pentane was added to precipitate the product. The resulting solid was dissolved in 1 ml of dichloromethane and 2 equiv. of pyridine was added followed by precipitation with 5 ml of pentane. Complex 2 was obtained as an off-white solid in 55% yield.

$^1\text{H}$  NMR: 8.94 (2H, m, Py), 7.84 (1H, m, Py), 7.68 (1H, br-d,  $J_{\text{HH}}= 8.20$  Hz, Ar), 7.44 (2H, m, Py), 7.44 (1H, m, Ar), 7.25 (1H, br-d,  $J_{\text{HH}}= 7.92$  Hz, Ar), 6.89 (1H, t,  $J_{\text{HH}}= 7.54$  Hz, Ar), 6.44 (1H, d,  $J_{\text{HH}}= 7.44$  Hz, ,  $J_{\text{PH}}= 57.60$  Hz, Ar), 2.78 (3H, s, Me-Ar), 1.63 (18H, d,  $J_{\text{PH}}= 14.97$  Hz,  $^t\text{Bu}$ );  $^{13}\text{C}\{^1\text{H}\}$  152.22 (d,  $J_{\text{PC}}= 26.60$  Hz, Ar), 151.63 (s, Py), 138.70 (s, Ar), 137.94 (s, Py), 137.41 (m, Ar), 132.76 (s, Ar), 132.34 (s, Ar), 132.06 (d,  $J_{\text{PC}}= 13.18$  Hz, Ar), 131.30 (m, Ar), 130.14 (d,  $J_{\text{PC}}= 8.82$  Hz, Ar), 125.80 (s, Py), 125.70 (s, Ar), 122.77 (s, Ar), 38.43 (d,  $J_{\text{PC}}= 23.00$  Hz,  $^t\text{Bu}$ ), 31.88 (m,  $J_{\text{PC}}= 4.52$  Hz,  $^t\text{Bu}$ ), 27.35 (br-s, Me-Ar);  $^{31}\text{P}\{^1\text{H}\}$  84.2 (s,  $J_{\text{PtP}}= 4183$  Hz); HRMS APPI: found for  $\text{C}_{24}\text{H}_{31}\text{ClNPPt} [\text{M}-\text{Cl}]^+$  (calc.) 558.1819 (558.1821).

## General synthetic procedure for complexes 3

A solution of **2** (100 mg, 0.17 mmol) in 5 ml of tetrahydrofuran was treated with 3 equiv. (0.51 mmol) of an arylmagnesium halide (Grignard reagents) in the presence of 3 equiv. (0.04 ml) of pyridine at  $-30^{\circ}\text{C}$ , followed by stirring at room temperature for 5 min – 5 h. The  $^{31}\text{P}$  NMR spectrum indicated the disappearance of the starting material and formation of a new complex with a splitting of about 2000 Hz. The reaction was quenched with 5 ml of saturated  $\text{NH}_4\text{Cl}$  and 5 ml of toluene was added. The organic layer was separated, washed with aqueous  $\text{NH}_4\text{Cl}$  and dried over anhydrous  $\text{MgSO}_4$ . The solution was filtered through celite and concentrated in vacuum. The addition of pentane resulted in the precipitation of the desired **3**.

**3a**: After stirring for 3 h at room temperature with 4-fluorophenyl magnesium bromide (0.51 ml, 1M in THF) the complex was isolated as an off-white solid in 60% yield.

$^1\text{H}$  NMR 8.85 (2H, m, Py), 7.69 (1H, m, Ar), 7.55 (1H, m, Py), 7.40 (1H, m, Ar), 7.40 (2H, m, Py), 7.30 (1H, d,  $J_{\text{HH}} = 7.04$  Hz, Ar), 7.24 (1H, dd,  $J_{\text{HH}} = 8.00$  Hz,  $J_{\text{HH}} = 2.30$  Hz, Ar), 7.18 (2H, m, 4- $\text{FC}_6\text{H}_4$ ), 6.95 (1H, m, Ar), 6.68 (2H, m, 4- $\text{FC}_6\text{H}_4$ ), 2.80 (3H, br-s, Me-Ar), 1.46 (18H, d,  $J_{\text{PH}} = 13.68$  Hz,  $^t\text{Bu}$ );  $^{13}\text{C}\{^1\text{H}\}$  171.90 (dd,  $J_{\text{PC}} = 116.36$  Hz,  $J_{\text{FC}} = 4.00$  Hz, 4- $\text{FC}_6\text{H}_4$ ), 160.32 (dd,  $J_{\text{FC}} = 237.80$  Hz,  $J_{\text{PC}} = 1.48$  Hz, 4- $\text{FC}_6\text{H}_4$ ), 155.40 (d,  $J_{\text{PC}} = 35.21$  Hz, Ar), 153.09 (s, Py), 138.57 (d,  $J_{\text{PC}} = 3.09$  Hz,  $J_{\text{PtC}} = 72.96$  Hz, Ar), 136.80 (d,  $J_{\text{PC}} = 2.02$  Hz, Ar), 136.32 (s, Py), 135.76 (dd,  $J = 4.83$  Hz,  $J = 1.44$  Hz,  $J_{\text{PtC}} = 32.28$  Hz, 4- $\text{FC}_6\text{H}_4$ ), 132.87 (s, Ar), 132.67 (s, Ar), 132.19 (d,  $J_{\text{PC}} = 13.73$  Hz, Ar), 131.60 (d,  $J_{\text{PC}} = 2.42$  Hz, Ar), 129.00 (d,  $J_{\text{PC}} = 7.09$  Hz, Ar), 125.62 (s, Ar), 125.10 (s,  $J_{\text{PtC}} = 20.64$  Hz, Py), 122.64 (s, Ar), 113.63 (dd,  $J = 17.21$  Hz,  $J = 7.31$  Hz,  $J_{\text{PtC}} = 74.51$  Hz, 4- $\text{FC}_6\text{H}_4$ ), 38.51 (d,  $J_{\text{PC}} = 12.80$  Hz,  $^t\text{Bu}$ ), 32.04 (d,  $J_{\text{PC}} = 6.50$  Hz,  $^t\text{Bu}$ ), 27.71 (d,  $J_{\text{PC}} = 1.27$  Hz, Me-Ar);  $^{31}\text{P}\{^1\text{H}\}$  84.3 (s,  $J_{\text{PtP}} = 1961$  Hz);  $^{19}\text{F}$  NMR  $-124.0$  (1F, m, 4- $\text{FC}_6\text{H}_4$ ). APPI- MS: found for  $\text{C}_{30}\text{H}_{35}\text{FNPPtO}$   $[\text{M}+\text{O}]^+$  (calc.) 670.2 (670.2).

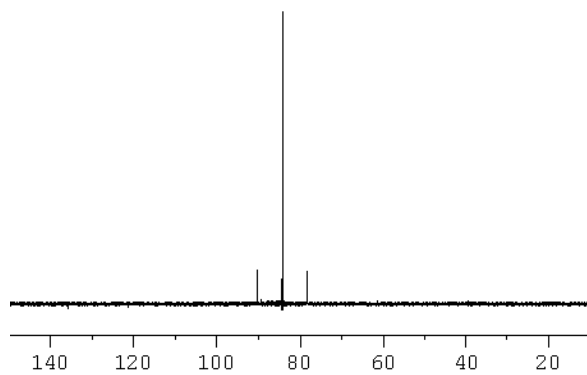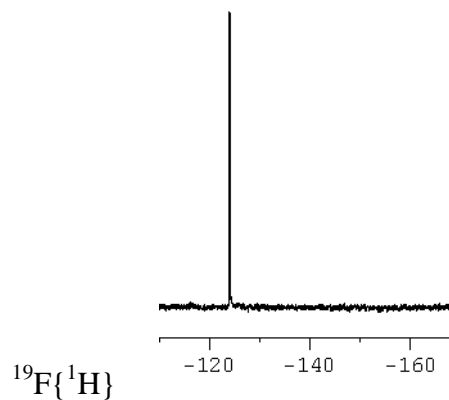

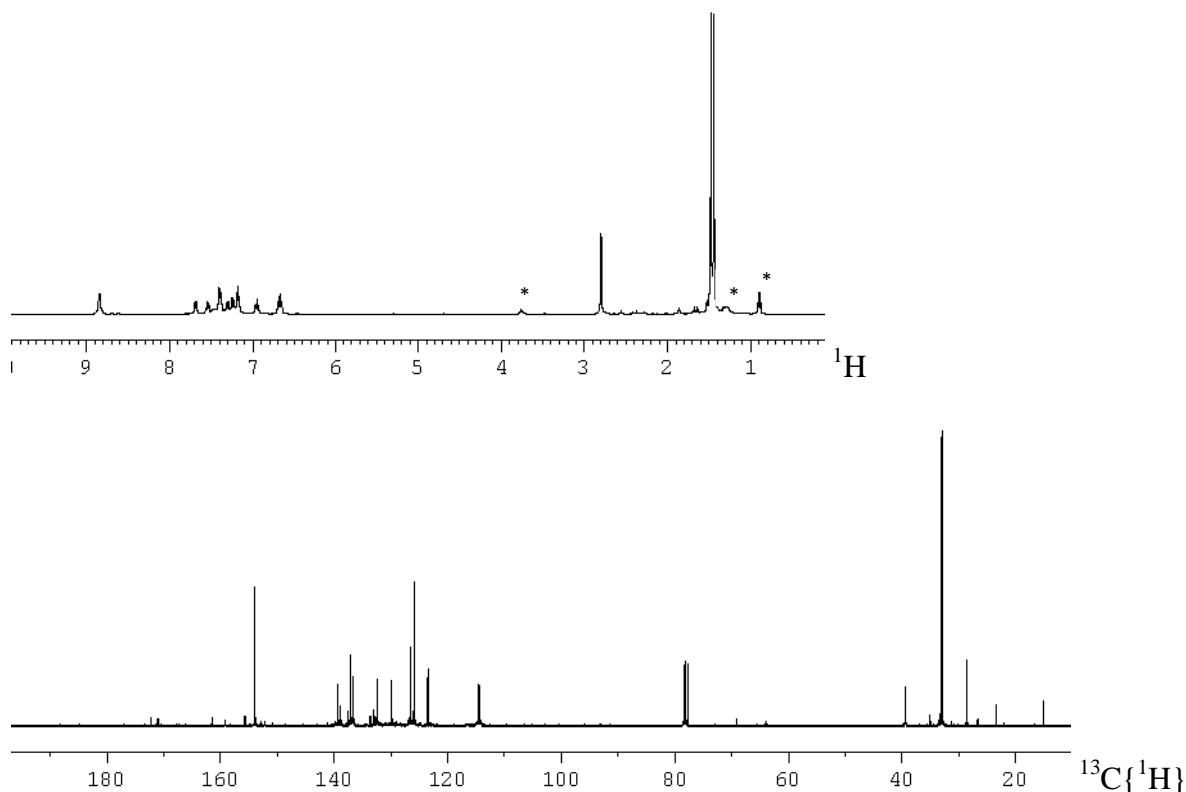

**3b:** After stirring for 45 min at room temperature with 3,5-difluorophenylmagnesium bromide (1.02 ml, 0.5M in ether) the complex was isolated as a yellow solid in 71% yield.

$^1\text{H}$  NMR 8.79 (2H, m, Py), 7.67 (1H, d,  $J_{\text{HH}}= 8.05$  Hz, Ar), 7.50 (1H, m, Py), 7.40 (1H, m, Ar), 7.27 (1H, d,  $J_{\text{HH}}= 7.36$  Hz, Ar), 7.21 (1H, dd,  $J_{\text{HH}}= 8.18$  Hz,  $J_{\text{HH}}= 2.48$  Hz, Ar), 7.13 (2H, m, Py), 7.03 (2H, m, 3,5- $\text{F}_2\text{C}_6\text{H}_3$ ), 6.96 (1H, t,  $J_{\text{HH}}= 7.58$  Hz, Ar), 6.25 (1H, tt,  $J_{\text{FH}}= 9.74$  Hz,  $J_{\text{HH}}= 2.15$  Hz, 3,5- $\text{F}_2\text{C}_6\text{H}_3$ ), 2.76 (3H, m, Me-Ar), 1.42 (18H, d,  $J_{\text{PH}}= 13.78$  Hz  $^t\text{Bu}$ );  $^{13}\text{C}\{^1\text{H}\}$  181.63 (dt,  $J_{\text{PC}}= 116.30$  Hz,  $J_{\text{FC}}= 2.16$  Hz, 3,5- $\text{F}_2\text{C}_6\text{H}_4$ ), 162.22 (dm,  $J_{\text{FC}}= 249.90$  Hz, 3,5- $\text{F}_2\text{C}_6\text{H}_4$ ), 154.62 (d,  $J_{\text{PC}}= 34.64$  Hz, Ar), 152.94 (s, Py), 138.55 (d,  $J_{\text{PC}}= 2.72$  Hz,  $J_{\text{PC}}= 74.52$  Hz, Ar), 136.53 (s, Py), 135.71 (d,  $J_{\text{PC}}= 2.28$  Hz, Ar), 132.63 (s, Ar), 132.28 (s, Ar), 132.19 (d,  $J_{\text{PC}}= 13.72$  Hz, Ar), 131.70 (d,  $J_{\text{PC}}= 2.25$  Hz, Ar), 129.07 (d,  $J_{\text{PC}}= 7.17$  Hz, Ar), 125.69 (s, Ar), 125.17 (s,  $J_{\text{PC}}= 20.88$  Hz, Py), 122.87 (s, Ar), 117.05 (dd,  $J= 13.91$  Hz,  $J= 2.69$  Hz, 3,5- $\text{F}_2\text{C}_6\text{H}_3$ ), 96.58 (t,  $J_{\text{FC}}= 25.49$  Hz, 3,5- $\text{F}_2\text{C}_6\text{H}_3$ ), 38.50 (d,  $J_{\text{PC}}= 13.50$  Hz,  $^t\text{Bu}$ ), 31.97 (d,  $J_{\text{PC}}= 6.28$  Hz,  $^t\text{Bu}$ ), 27.63 (d,  $J_{\text{PC}}= 1.44$  Hz, Me-Ar);  $^{31}\text{P}\{^1\text{H}\}$  84.0 (t,  $J_{\text{FP}}= 15$  Hz,  $J_{\text{PP}}= 2059$  Hz);  $^{19}\text{F}$  NMR  $-115.7$  (2F, m, 3,5- $\text{F}_2\text{C}_6\text{H}_3$ ).

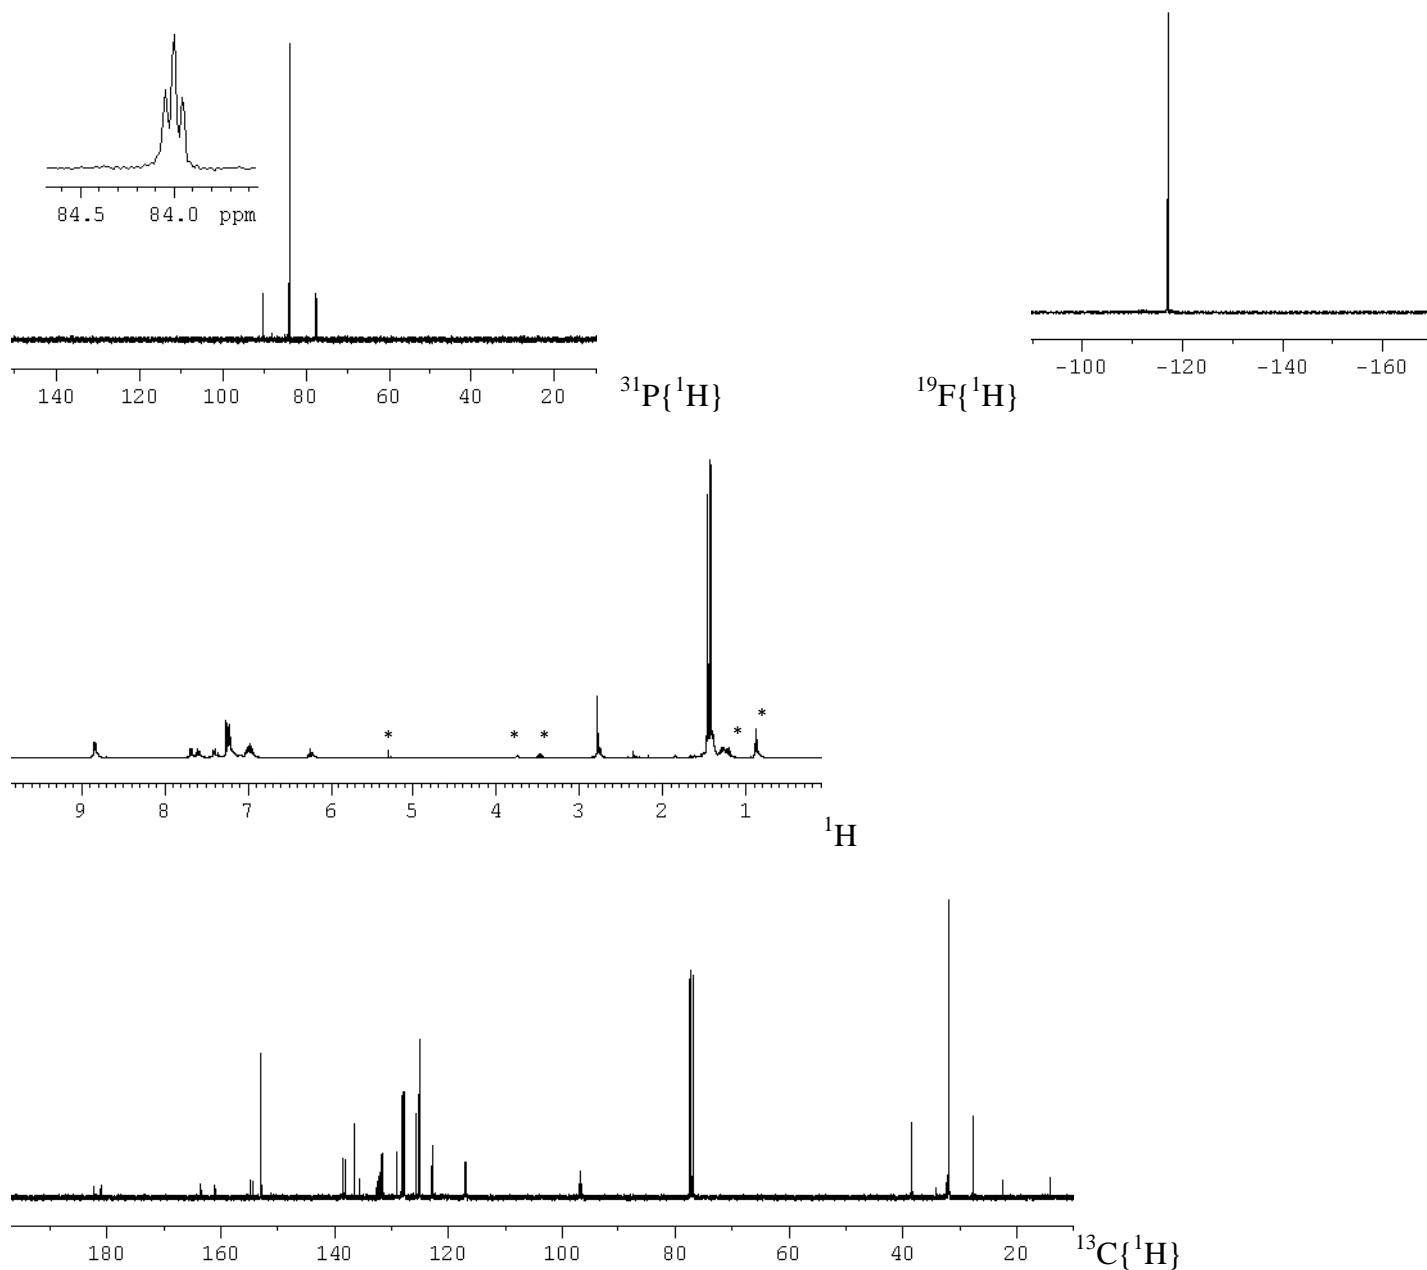

**3c:** After stirring for 5 min at room temperature with 4-methoxyphenylmagnesium bromide (1.02 ml, 0.5M in THF) the complex was isolated as an off-white solid in a 50% yield.

$^1\text{H}$  NMR 8.87 (2H, m, Py), 7.69 (1H, d,  $J_{\text{HH}} = 8.15$  Hz, Ar), 7.53 (1H, m, Py), 7.40 (2H, d,  $J_{\text{HH}} = 7.43$  Hz, 4-OMeC<sub>6</sub>H<sub>4</sub>), 7.35 (2H, m, Py), 7.26 (1H, m, Ar), 7.23 (1H, m, Ar), 7.16 (1H, m, Ar), 6.97 (1H, t,  $J_{\text{HH}} = 7.43$  Hz, Ar), 6.59 (2H, d,  $J_{\text{HH}} = 7.35$  Hz, 4-OMeC<sub>6</sub>H<sub>4</sub>), 3.72 (3H, s, 4-OMeC<sub>6</sub>H<sub>4</sub>), 2.80 (3H, br-s, Me-Ar), 1.47 (18H, d,  $J_{\text{PH}} = 13.39$  Hz, <sup>t</sup>Bu);  $^{13}\text{C}\{^1\text{H}\}$  166.93 (d,  $J_{\text{PC}} = 115.62$  Hz, 4-OMeC<sub>6</sub>H<sub>4</sub>), 154.89 (d,  $J_{\text{PC}} = 36.00$  Hz, Ar), 154.36 (m, 4-OMeC<sub>6</sub>H<sub>4</sub>), 153.21 (s, Py), 138.71 (d,  $J_{\text{PC}} = 3.08$  Hz,  $J_{\text{PC}} = 76.55$  Hz, Ar), 137.29 (s, Ar), 136.14 (s, Py), 135.64 (m,  $J_{\text{PC}} = 31.39$  Hz, 4-OMeC<sub>6</sub>H<sub>4</sub>), 133.12 (s, Ar), 132.80 (s, Ar), 132.11 (d,  $J_{\text{PC}} = 13.71$  Hz, Ar), 131.50

(m, Ar), 128.85 (d,  $J_{PC}= 6.95$  Hz, Ar), 125.43 (s, Ar), 124.94 (s,  $J_{PC}= 22.27$  Hz, Py), 122.43 (s, Ar), 112.90 (d,  $J_{PC}= 6.95$  Hz,  $J_{PC}= 70.92$  Hz, 4-OMeC<sub>6</sub>H<sub>4</sub>), 54.89 (s, 4-OMeC<sub>6</sub>H<sub>4</sub>), 38.44 (d,  $J_{PC}= 12.22$  Hz, <sup>t</sup>Bu), 32.00 (s,  $J_{PC}= 6.54$  Hz, <sup>t</sup>Bu), 27.68 (m, Me-Ar); <sup>31</sup>P{<sup>1</sup>H} 85.1 (s,  $J_{PtP}= 1919$  Hz).

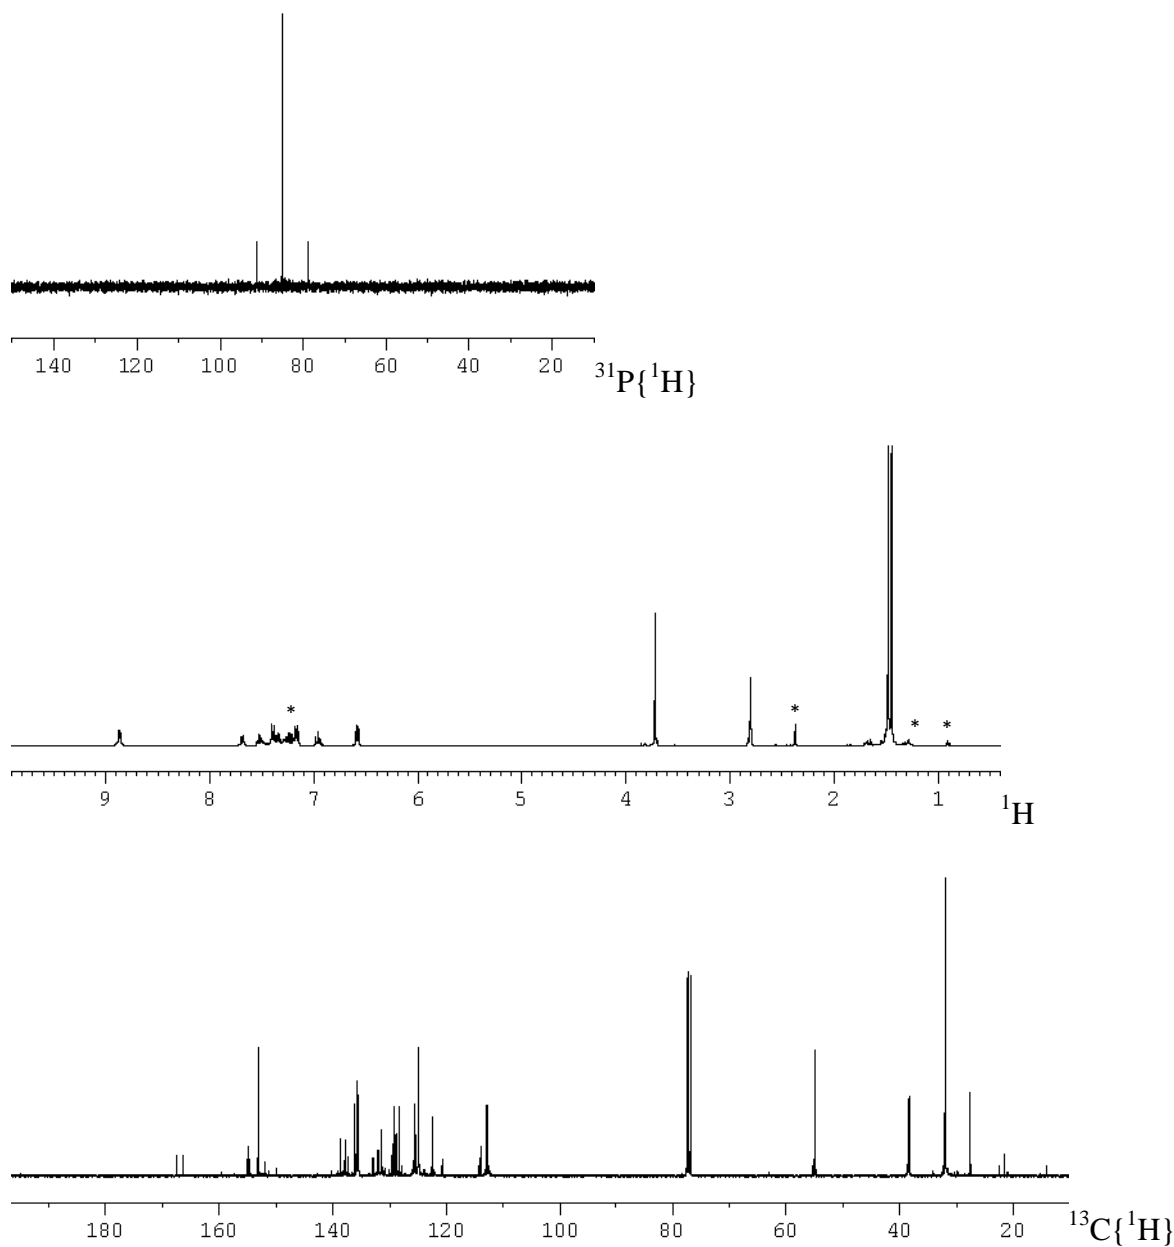

**3d:** After stirring for 5 h at room temperature with *o*-tolylmagnesium chloride (0.51 ml, 1M in THF), the complex was isolated as an off-white solid in a 58% yield.

<sup>1</sup>H NMR (CDCl<sub>3</sub>)  $\delta$  8.91 (2H, m, Py), 7.70 (1H, br-d,  $J_{HH}= 7.48$  Hz, Ar), 7.49 (2H, m, Ar), 7.40 (1H, m, Py), 7.32 (1H, d,  $J_{HH}= 8.05$  Hz, Ar), 7.25 (1H, dd,  $J_{HH}= 7.94$  Hz,  $J_{HH}= 2.33$  Hz, Me-C<sub>6</sub>H<sub>4</sub>), 7.14 (2H, m, Py), 6.95 (1H, m, Me-C<sub>6</sub>H<sub>4</sub>), 6.95 (1H, m, Ar), 6.82 (2H, m, Me-C<sub>6</sub>H<sub>4</sub>), 2.83 (3H, s, Me-C<sub>6</sub>H<sub>4</sub>), 2.58 (3H, br-s, Me-Ar),

1.52 (9H, d,  $J_{\text{PH}} = 13.48$  Hz,  $^1\text{Bu}$ ), 1.46 (9H, d,  $J_{\text{PH}} = 13.58$  Hz,  $^1\text{Bu}$ );  $^{13}\text{C}\{^1\text{H}\}$  177.63 (d,  $J_{\text{PC}} = 112.66$  Hz, Me- $\text{C}_6\text{H}_4$ ), 154.68 (d,  $J_{\text{PC}} = 35.30$  Hz, Ar), 152.95 (s, Py), 141.44 (s, Me- $\text{C}_6\text{H}_4$ ), 137.83 (s, Ar), 137.07 (d,  $J_{\text{PC}} = 3.42$  Hz,  $J_{\text{PC}} = 76.68$  Hz, Ar), 136.15 (s, Py), 135.91 (m, Ar), 134.73 (s, Me- $\text{C}_6\text{H}_4$ ), 133.24 (s, Ar), 132.91 (s, Ar), 132.10 (d,  $J_{\text{PC}} = 13.81$  Hz, Ar), 131.48 (s, Ar), 128.75 (m, Ar), 125.82 (s, Ar), 124.84 (s, Py), 124.30 (d,  $J_{\text{PC}} = 6.55$  Hz, Me- $\text{C}_6\text{H}_4$ ), 122.35 (s, Ar), 121.42 (s, Me- $\text{C}_6\text{H}_4$ ), 38.62 (d,  $J_{\text{PC}} = 12.80$  Hz,  $^1\text{Bu}$ ), 38.45 (d,  $J_{\text{PC}} = 12.01$  Hz,  $^1\text{Bu}$ ), 32.02 (d,  $J_{\text{PC}} = 5.95$  Hz,  $^1\text{Bu}$ ), 31.89 (d,  $J_{\text{PC}} = 6.04$  Hz,  $^1\text{Bu}$ ), 27.73 (s, Me-Ar), 26.63 (m,  $J_{\text{PC}} = 74.17$  Hz, Me- $\text{C}_6\text{H}_4$ );  $^{31}\text{P}\{^1\text{H}\}$  84.8 (s,  $J_{\text{PP}} = 1923$  Hz); Elemental Analysis: Found: C, 57.07; H, 5.63; Calc. for  $\text{C}_{31}\text{H}_{38}\text{NPt}$ : C, 57.22; H, 5.89.

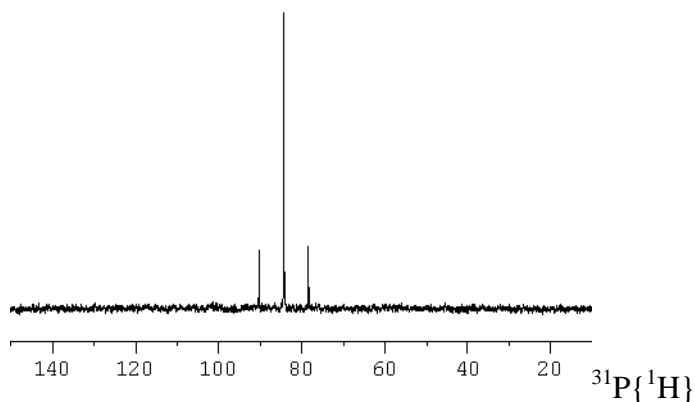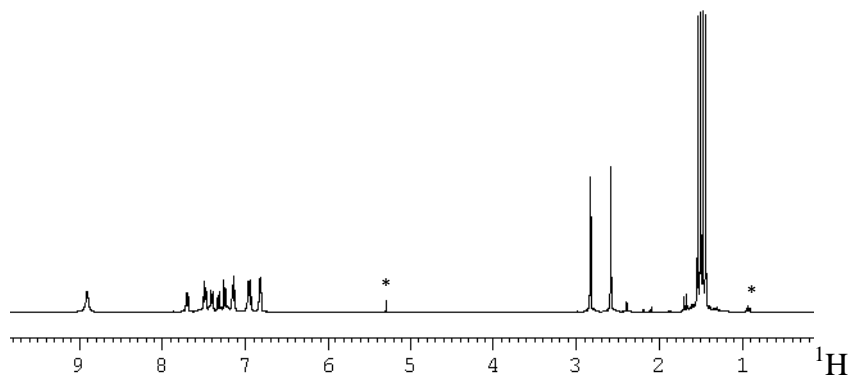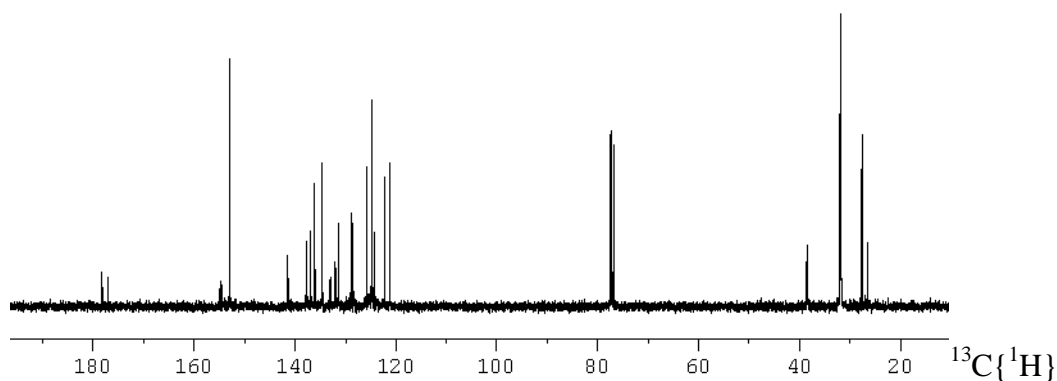



**3e:** After stirring for 5 h at room temperature with pentafluorophenylmagnesium bromide (1.02 ml, 0.5 M in ether), the complex was isolated as an off-white solid in a 40% yield.

$^1\text{H}$  NMR 8.90 (2H, m, Py), 7.70 (1H, br-d,  $J_{\text{HH}}=8.22$  Hz, Ar), 7.62 (1H, m, Py), 7.42 (2H, m, Ar), 7.26 (2H, m, Py), 7.14 (1H, m, Ar), 6.95 (1H, m, Ar), 2.80 (3H, br-s, Me-Ar), 1.48 (18H, d,  $J_{\text{PH}}=14.14$  Hz,  $^t\text{Bu}$ );  $^{13}\text{C}\{^1\text{H}\}$  154.03 (d,  $J_{\text{PC}}=33.10$  Hz, Ar), 153.38 (s, Py), 146.36 (dm,  $J_{\text{FC}}=220.05$  Hz,  $\text{C}_6\text{F}_5$ ), 138.29 (m, Ar), 138.04 (m,  $\text{C}_6\text{F}_5$ ), 137.22 (m, Ar), 137.07 (s, Py), 136.07 (m,  $\text{C}_6\text{F}_5$ ), 132.45 (s, Ar), 132.32 (d,  $J_{\text{PC}}=14.08$  Hz, Ar), 132.09 (s, Ar), 131.78 (m, Ar), 129.24 (m, Ar), 125.86 (s, Ar), 125.30 (s,  $J_{\text{PC}}=20.88$  Hz, Py), 123.30 (s, Ar), 39.13 (d,  $J_{\text{PC}}=17.18$  Hz,  $^t\text{Bu}$ ), 31.92 (d,  $J_{\text{PC}}=5.86$  Hz,  $^t\text{Bu}$ ), 27.56 (br-s, Me-Ar);  $^{31}\text{P}\{^1\text{H}\}$  85.9 (m,  $J_{\text{PP}}=2825$  Hz);  $^{19}\text{F}$  NMR  $-119.9$  (2F, m,  $J_{\text{PF}}=406$  Hz,  $\text{C}_6\text{F}_5$ ),  $-163.4$  (3F, m,  $\text{C}_6\text{F}_5$ ).

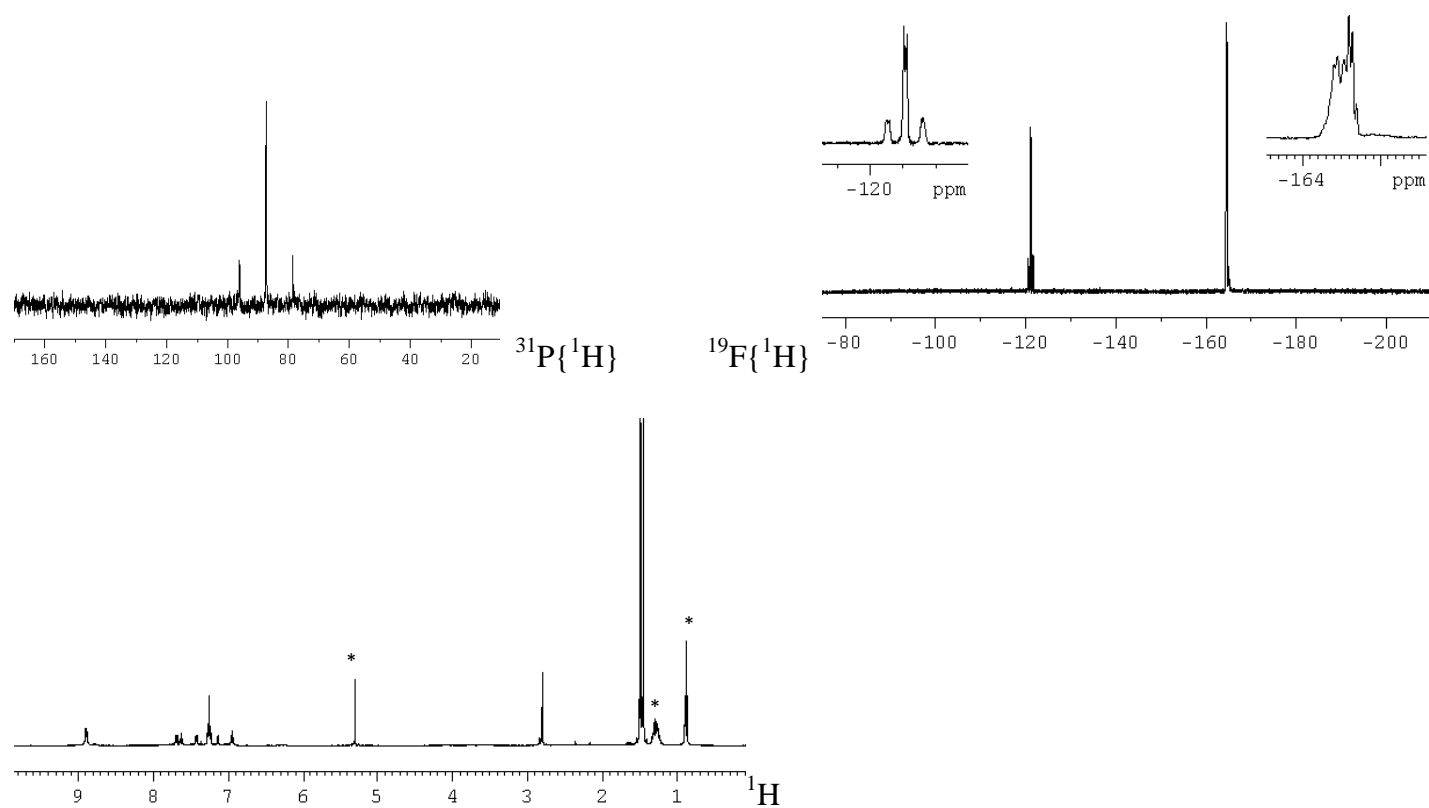

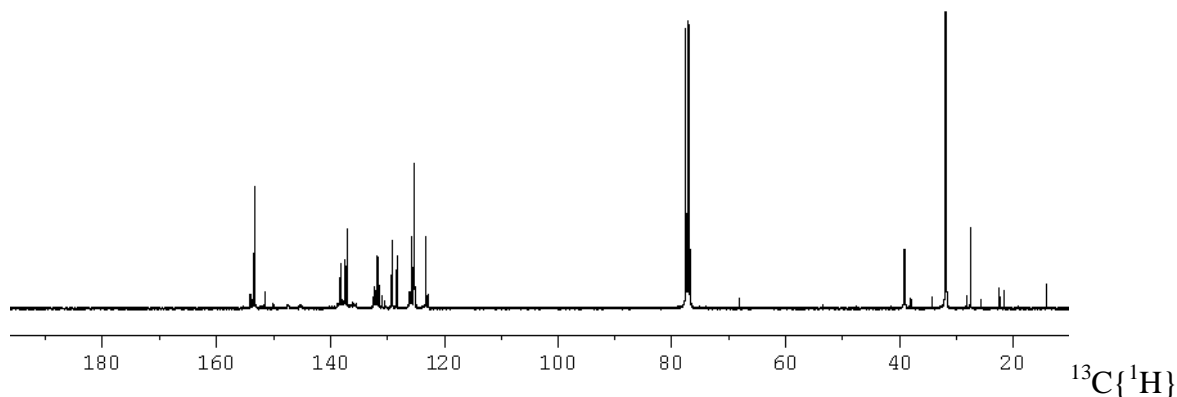

### Reactions with XeF<sub>2</sub>

In a glove box, a cold (-30°C) freshly prepared solution of XeF<sub>2</sub> (1eq) in CD<sub>3</sub>CN or CH<sub>2</sub>Cl<sub>2</sub> was quickly added to a solution of **3** (10mg, 1eq) in a plastic vial at -30°C. The reaction mixture was left at this temperature for 10 min and then slowly warmed to room temperature. The <sup>31</sup>P{<sup>1</sup>H} and <sup>19</sup>F{<sup>1</sup>H}NMR analysis (in a PTFE liner) showed the formation of the corresponding complexes **4a-d**.

**4a** (263K): <sup>1</sup>H NMR (CD<sub>3</sub>CN) δ 9.74 (1H, m, Py), 8.01 (1H, m, Py), 7.96 (1H, dm, J<sub>HH</sub>= 8.23 Hz, Ar), 7.66 (2H, m, Ar), 7.66 (1H, m, Py), 7.49 (1H, m, Ar), 7.42 (1H, m, Py), 7.04 (1H, m, Py), 6.75 (1H, m, Ar), 6.64 (1H, m, 4-FC<sub>6</sub>H<sub>4</sub>), 6.60 (1H, m, 4-FC<sub>6</sub>H<sub>4</sub>), 6.28 (1H, m, 4-FC<sub>6</sub>H<sub>4</sub>), 5.50 (1H, m, 4-FC<sub>6</sub>H<sub>4</sub>), 2.79 (3H, br-s, Me-Ar), 1.81 (3H, d, J<sub>PH</sub>= 16.43 Hz, <sup>t</sup>Bu), 1.53 (3H, d, J<sub>PH</sub>= 15.73 Hz, <sup>t</sup>Bu), 1.46 (3H, m, <sup>t</sup>Bu), 1.24 (3H, d, J<sub>PH</sub>= 13.68 Hz, <sup>t</sup>Bu), 1.18 (3H, d, J<sub>PH</sub>= 15.04 Hz, <sup>t</sup>Bu), 0.58 (3H, dm, J<sub>PH</sub>= 15.73 Hz, <sup>t</sup>Bu); <sup>13</sup>C{<sup>1</sup>H} 178.17 (d, J<sub>PC</sub>= 137.56 Hz, 4-FC<sub>6</sub>H<sub>4</sub>), 162.18 (d, J<sub>FC</sub>= 240.50 Hz, 4-FC<sub>6</sub>H<sub>4</sub>), 152.03 (m, Ar), 150.97 (m, Ar), 150.03 (m, Ar), 149.54 (dm, J<sub>PC</sub>= 9.57 Hz, Ar), 147.89 (dm, J<sub>FC</sub>= 20.66 Hz, Ar), 142.01 (d, J<sub>PC</sub>= 2.19 Hz, J<sub>PC</sub>= 36.34 Hz, Ar), 140.75 (m, Ar), 136.41 (dm, J= 17.63 Hz, 4-FC<sub>6</sub>H<sub>4</sub>), 135.24 (dm, J= 85.09 Hz, 4-FC<sub>6</sub>H<sub>4</sub>), 133.13 (m, Ar), 132.06 (m, Ar), 131.97 (s, Ar), 131.88 (s, Ar), 126.71 (d, J<sub>PC</sub>= 3.46 Hz, Ar), 126.26 (m, Ar), 125.63 (s, Ar), 114.72 (dm, J<sub>FC</sub>= 20.77 Hz, 4-FC<sub>6</sub>H<sub>4</sub>), 114.05 (dm, J<sub>FC</sub>= 19.60 Hz, 4-FC<sub>6</sub>H<sub>4</sub>), 43.71 (dm, J<sub>PC</sub>= 22.16 Hz, <sup>t</sup>Bu), 41.22 (m, <sup>t</sup>Bu), 32.09 (m, <sup>t</sup>Bu), 31.66 (m, <sup>t</sup>Bu), 31.45 (m, <sup>t</sup>Bu), 31.38 (m, <sup>t</sup>Bu), 30.64 (m, <sup>t</sup>Bu), 29.12 (m, J<sub>PC</sub>= 23.57 Hz, <sup>t</sup>Bu), 26.12 (m, Me-Ar); <sup>31</sup>P{<sup>1</sup>H} 76.5 (s, J<sub>PP</sub>= 2855 Hz); <sup>19</sup>F NMR -121.4 (1F, m, 4-FC<sub>6</sub>H<sub>4</sub>), -206.3 (1F, dm, J<sub>FF</sub>= 100 Hz), -220.7 (1F, d, J<sub>FF</sub>= 100 Hz)

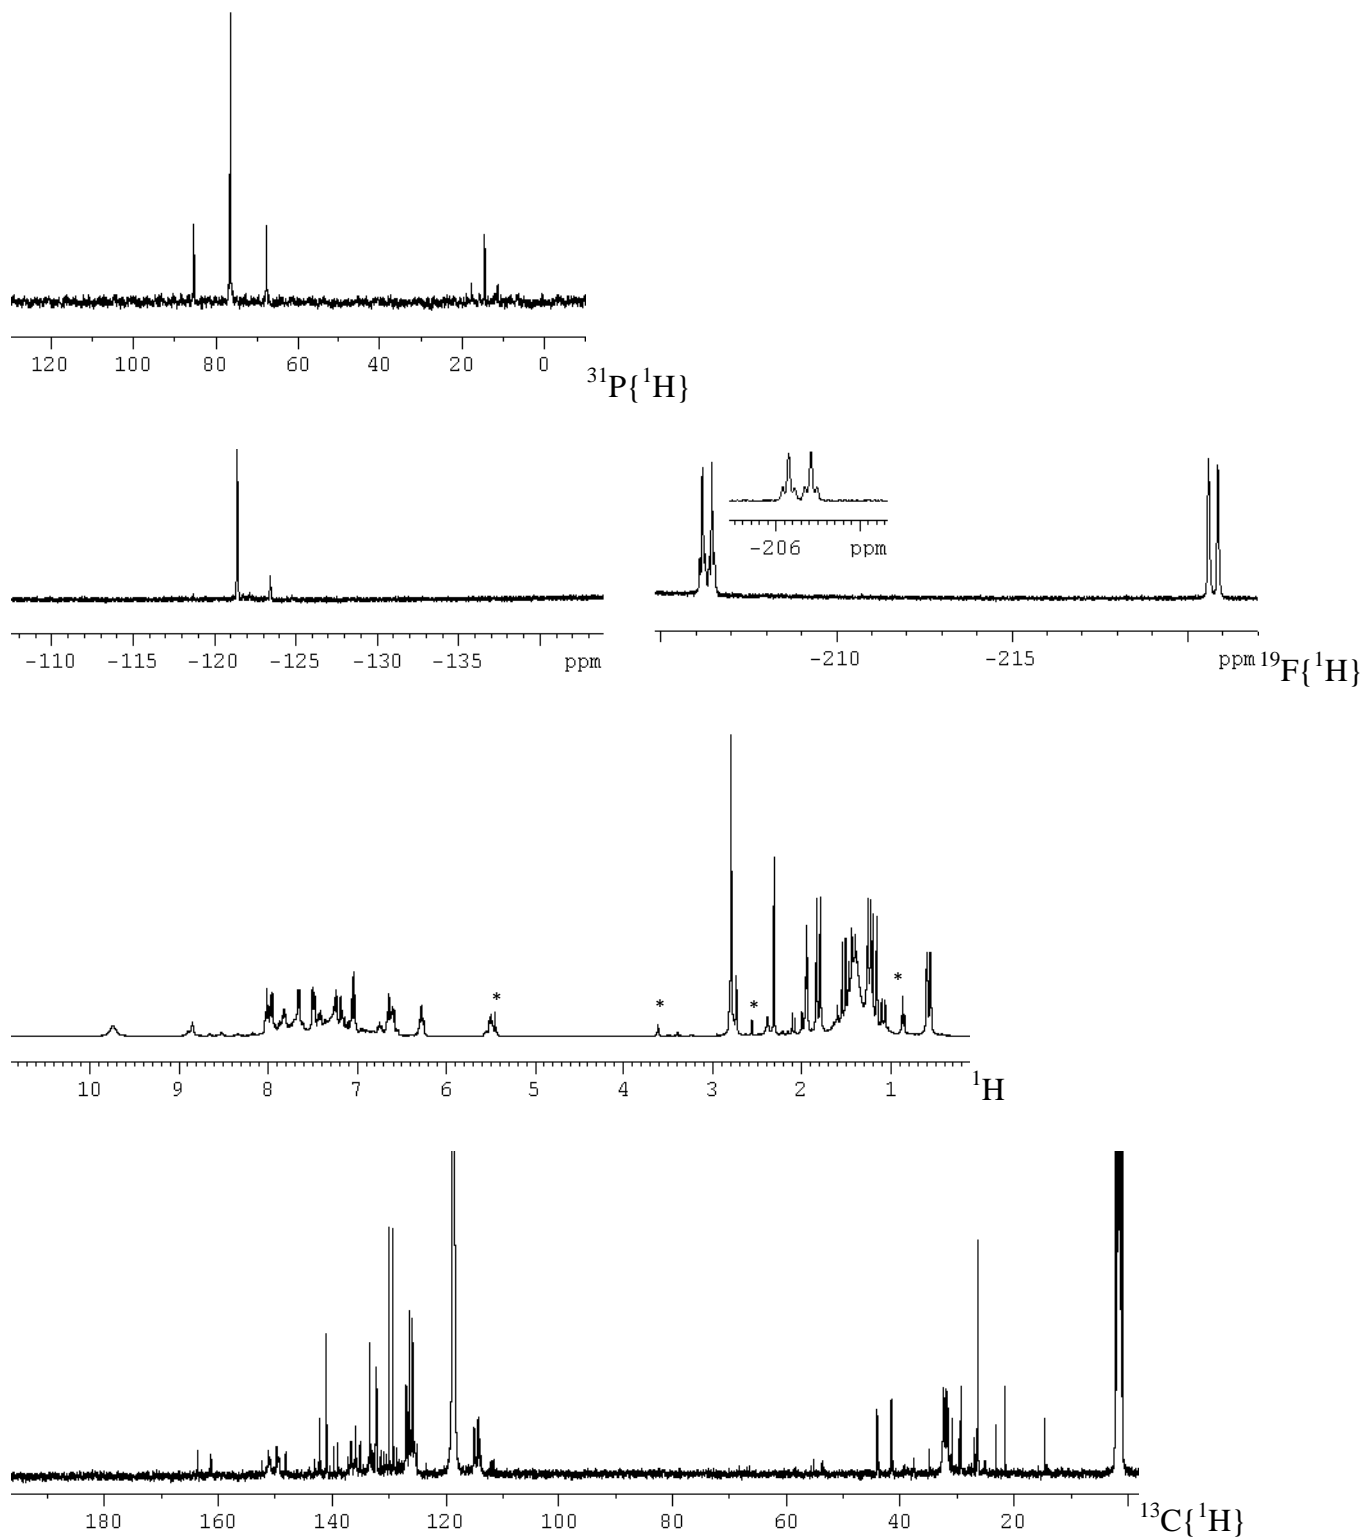

**4b** (263K):  $^1\text{H}$  NMR ( $\text{CD}_3\text{CN}$ )  $\delta$  9.68 (1H, m, Py), 8.04 (1H, m, Py), 7.99 (1H, dm,  $J_{\text{HH}} = 8.38$  Hz, Ar), 7.69 (2H, m, Ar), 7.69 (1H, m, Py), 7.52 (1H, m, Ar), 7.43 (1H, m, Py), 7.07 (1H, m, Py), 6.67 (1H, m, Ar), 6.59 (1H, m, 3,5- $\text{FC}_6\text{H}_4$ ), 6.54 (1H, m, 3,5- $\text{FC}_6\text{H}_4$ ), 5.08 (1H, m, 3,5- $\text{FC}_6\text{H}_4$ ), 2.80 (3H, m, Me-Ar), 1.81 (3H, d,  $J_{\text{PH}} =$

16.94 Hz, <sup>t</sup>Bu), 1.45 (6H, m, <sup>t</sup>Bu), 1.23 (3H, m, <sup>t</sup>Bu), 1.18 (3H, d, J<sub>PH</sub>= 16.20 Hz, <sup>t</sup>Bu), 0.57 (3H, dm, J<sub>PH</sub>= 16.11 Hz, <sup>t</sup>Bu); <sup>13</sup>C{<sup>1</sup>H} 180.41 (d, J<sub>PC</sub>= 116.34 Hz, 3,5-F<sub>2</sub>C<sub>6</sub>H<sub>4</sub>), 161.10 (dm, J<sub>FC</sub>= 243.94 Hz, 3,5-F<sub>2</sub>C<sub>6</sub>H<sub>4</sub>), 151.24 (m, Ar), 150.86 (dm, J<sub>FC</sub>= 4.70 Hz, Ar), 149.97 (m, Ar), 149.51 (dm, J<sub>PC</sub>= 10.24 Hz, Ar), 147.26 (dm, J<sub>FC</sub>= 19.90 Hz, Ar), 143.06 (m, Ar), 142.42 (d, J<sub>PC</sub>= 2.25 Hz, J<sub>FC</sub>= 35.33 Hz, Ar), 141.10 (m, Ar), 133.25 (m, Ar), 132.24 (m, Ar), 132.14 (m, Ar), 126.86 (d, J<sub>PC</sub>= 3.11 Hz, Ar), 126.53 (m, Ar), 125.97 (s, Ar), 117.30 (m, 3,5-F<sub>2</sub>C<sub>6</sub>H<sub>3</sub>), 115.84 (m, 3,5-F<sub>2</sub>C<sub>6</sub>H<sub>3</sub>), 101.12 (t, J<sub>FC</sub>= 25.24 Hz, 3,5-F<sub>2</sub>C<sub>6</sub>H<sub>3</sub>), 44.00 (dm, J<sub>PC</sub>= 21.75 Hz, <sup>t</sup>Bu), 41.39 (m, <sup>t</sup>Bu), 31.98 (m, <sup>t</sup>Bu), 31.63 (m, <sup>t</sup>Bu), 31.56 (m, <sup>t</sup>Bu), 31.34 (m, <sup>t</sup>Bu), 30.58 (m, <sup>t</sup>Bu), 29.07 (m, J<sub>PC</sub>= 22.23 Hz, <sup>t</sup>Bu), 26.12 (m, Me-Ar); <sup>31</sup>P{<sup>1</sup>H} 77.6 (s, J<sub>PP</sub>= 2771 Hz); <sup>19</sup>F NMR -112.0 (2F, m, 3,5-F<sub>2</sub>C<sub>6</sub>H<sub>3</sub>), -203.2 (1F, d, J<sub>FF</sub>= 98 Hz), -226.8 (1F, dm, J<sub>FF</sub>= 98 Hz)

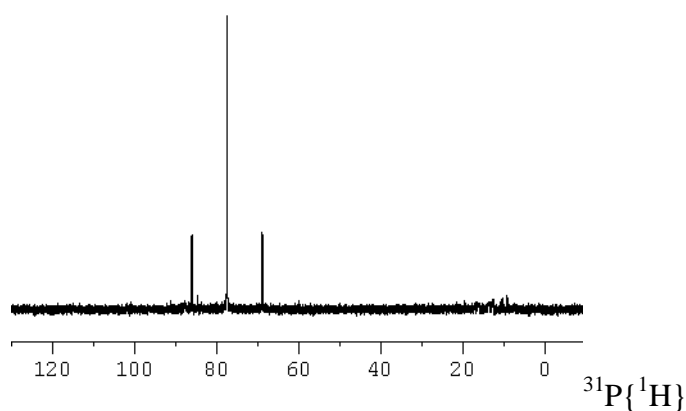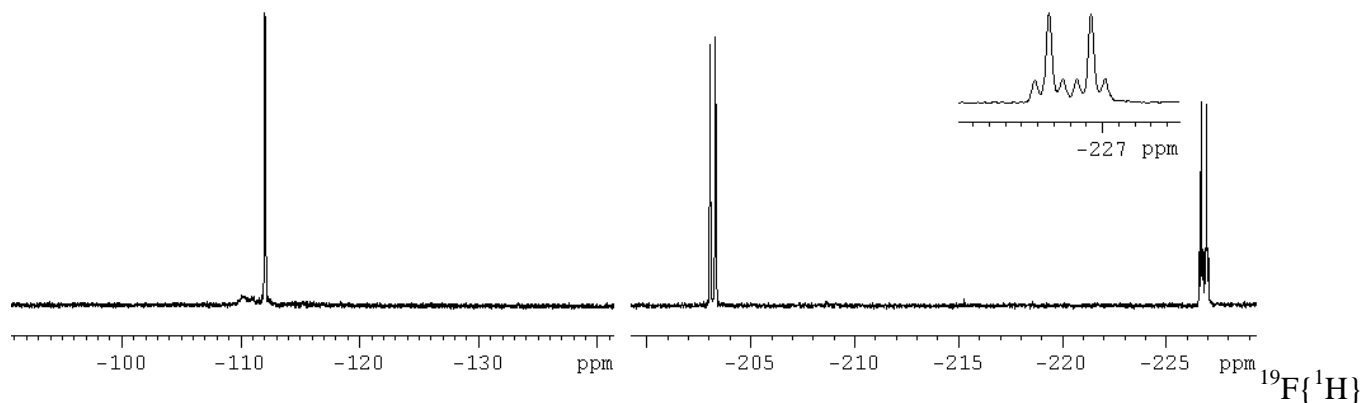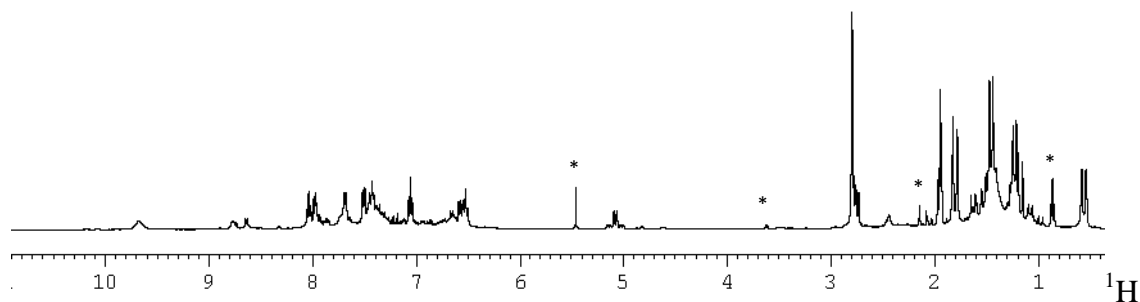

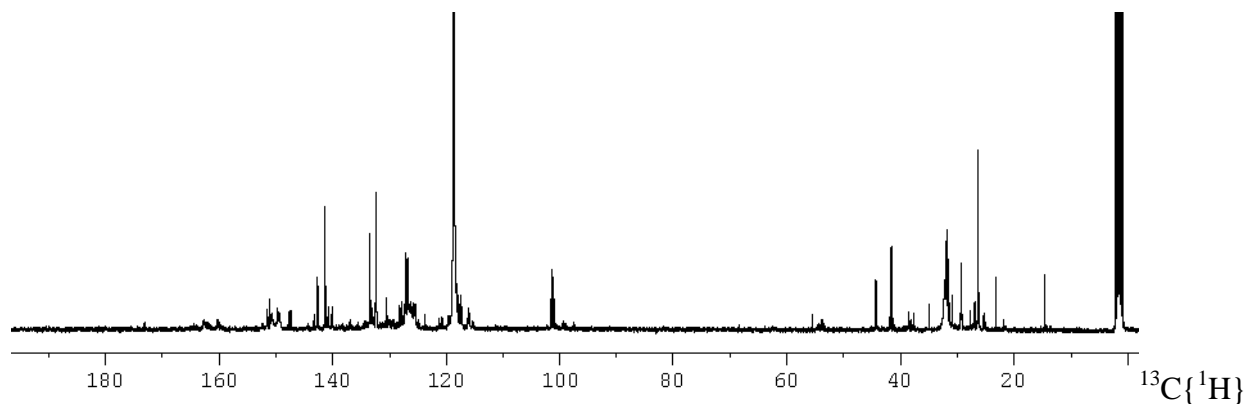

**4c** (263K):  $^1\text{H}$  NMR ( $\text{CD}_3\text{CN}$ )  $\delta$  8.01 (1H, m, Py), 7.96 (1H, dd,  $J_{\text{HH}} = 8.36$  Hz,  $J_{\text{HH}} = 2.05$  Hz, Ar), 7.66 (2H, m, Ar), 7.60 (1H, m, Py), 7.49 (1H, m, Ar), 7.42 (1H, m, Py), 7.25 (1H, m, Ar), 7.03 (2H, m, Py), 6.56 (1H, m, Ar), 6.47 (1H, dd,  $J_{\text{HH}} = 8.90$  Hz,  $J_{\text{HH}} = 2.98$  Hz, Ar), 6.08 (1H, m, dd,  $J_{\text{HH}} = 8.86$  Hz,  $J_{\text{HH}} = 3.11$  Hz, Ar), 5.35 (1H, d, dd,  $J_{\text{HH}} = 8.69$  Hz,  $J_{\text{PH}} = 42.53$  Hz, Ar), 3.54 (3H, s, OMe), 2.79 (3H, br-s, Me-Ar), 1.81 (3H, d,  $J_{\text{PH}} = 16.87$  Hz,  $^t\text{Bu}$ ), 1.57 (3H, d,  $J_{\text{PH}} = 16.87$  Hz,  $^t\text{Bu}$ ), 1.41 (3H, m,  $^t\text{Bu}$ ), 1.25 (3H, d,  $J_{\text{PH}} = 12.50$  Hz,  $^t\text{Bu}$ ), 1.19 (3H, d,  $J_{\text{PH}} = 15.62$  Hz,  $^t\text{Bu}$ ), 0.57 (3H, br-d,  $J_{\text{PH}} = 16.24$  Hz,  $^t\text{Bu}$ );  $^{31}\text{P}\{^1\text{H}\}$  77.6 (s,  $J_{\text{PH}} = 2771$  Hz);  $^{19}\text{F}$  NMR -206.5 (1F, d,  $J_{\text{FF}} = 98$  Hz), -216.5 (1F, d,  $J_{\text{FF}} = 98$  Hz);

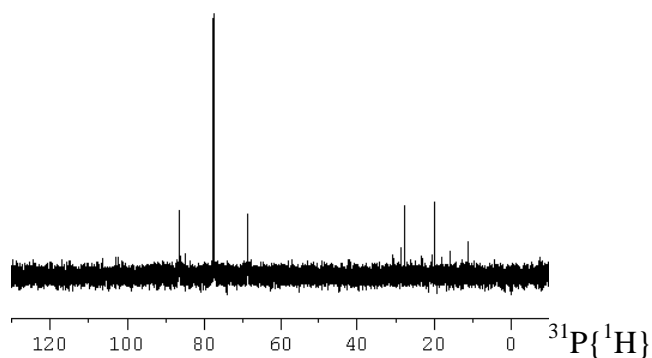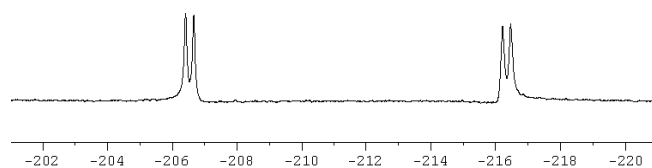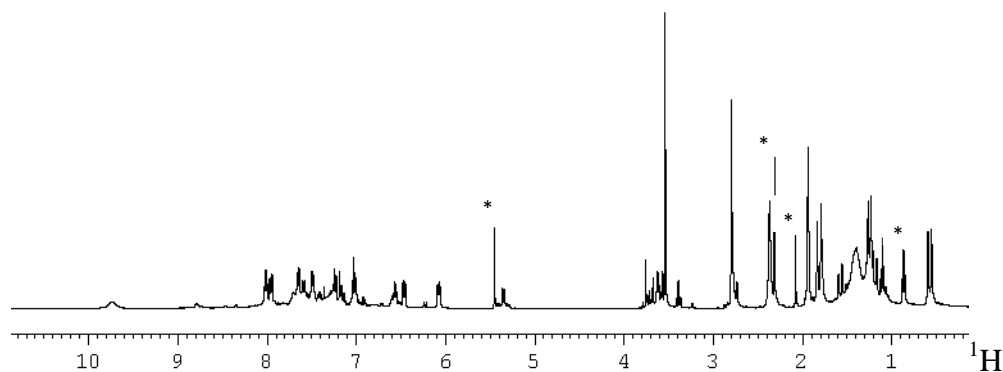

**4d:**  $^1\text{H}$  NMR ( $\text{CD}_3\text{CN}$ )  $\delta$  9.89 (1H, m, Py), 8.07 (1H, m, Py), 7.98 (1H, dd,  $J_{\text{HH}}=8.30$  Hz,  $J_{\text{HH}}=2.46$  Hz, Ar), 7.75 (1H, m, Ar), 7.65 (1H, dm,  $J_{\text{HH}}=8.61$  Hz, Ar), 7.57 (1H, m, Py), 7.53 (1H, dd,  $J_{\text{HH}}=8.30$  Hz,  $J_{\text{HH}}=3.36$  Hz, Ar), 7.27 (2H, m, Py), 7.05 (1H, t,  $J_{\text{HH}}=7.69$  Hz, Ar), 6.63 (2H, m, Ar), 6.10 (1H, m, Ar), 6.02 (1H, m, Ar), 2.87 (3H, m, Me-Ar), 2.04 (3H, m, Me-Ar), 1.60 (3H, m,  $^t\text{Bu}$ ), 1.44 (9H,  $J_{\text{PH}}=15.26$  Hz,  $^t\text{Bu}$ ), 1.33 (6H, m,  $^t\text{Bu}$ );  $^{31}\text{P}\{^1\text{H}\}$  74.6 (s,  $J_{\text{PtP}}=2922.5$  Hz);  $^{19}\text{F}$  NMR  $-202.3$  (1F, d,  $J_{\text{FF}}=131$  Hz),  $-219.1$  (1F, d,  $J_{\text{FF}}=131$  Hz);

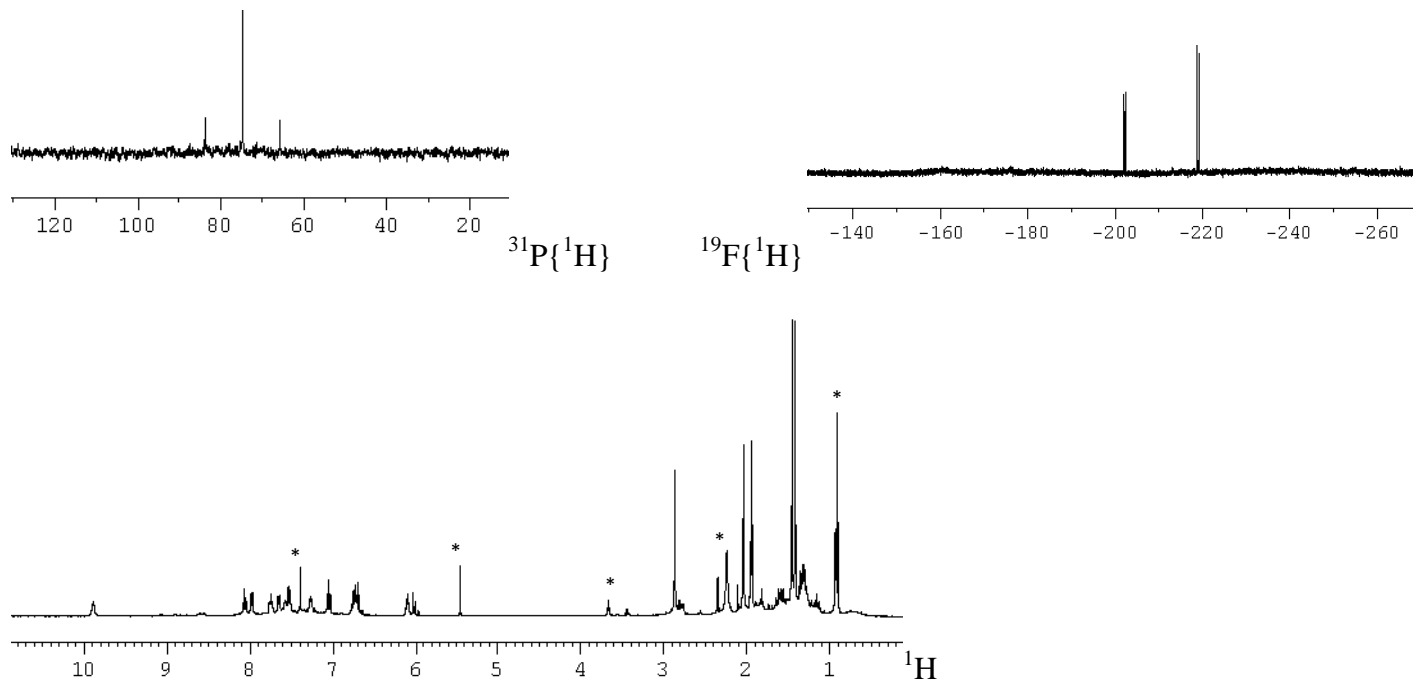

#### Preparation of complexes **5a-d**.

Solutions of complexes **4a-d** were left at room temperature (**4c,d**) or heated at  $60^\circ\text{C}$  (**4a,b**) in a Schlenk flask for 16 h. The formation of the doubly cyclometallated complexes **5** was confirmed by the  $^{31}\text{P}\{^1\text{H}\}$  NMR spectroscopy. The formation of complexes **6** accompanied the conversion of **4** to **5**.

**5a:**  $^1\text{H}$  NMR ( $\text{CDCl}_3$ )  $\delta$  7.66 (1H, dd,  $J_{\text{HH}}=8.35$  Hz,  $J_{\text{HH}}=2.25$  Hz, Ar), 7.45 (3H, m, Ar), 7.24 (1H, m, Ar), 7.18 (1H, dd,  $J_{\text{HH}}=8.37$  Hz,  $J_{\text{HH}}=2.41$  Hz, Ar), 6.73 (1H, m, Ar), 2.75 (3H, m, Me-Ar), 1.47 (18H, d,  $J_{\text{PH}}=14.26$  Hz,  $^t\text{Bu}$ );  $^{13}\text{C}\{^1\text{H}\}$  168.10 (d,  $J_{\text{PC}}=103.55$  Hz, Ar), 162.63 (dd,  $J_{\text{FC}}=247.70$  Hz,  $J_{\text{PC}}=10.06$  Hz, Ar), 152.47 (s, Ar), 151.22 (m, Ar), 151.07 (d,  $J_{\text{PC}}=22.49$  Hz, Ar), 149.10 (m, Ar), 138.83 (s,  $J_{\text{PC}}=30.61$  Hz, Ar), 133.58 (d,  $J_{\text{PC}}=34.44$  Hz, Ar), 131.30 (d,  $J_{\text{PC}}=13.39$  Hz, Ar), 130.98 (br-s, Ar), 129.26 (d,  $J_{\text{PC}}=7.84$  Hz, Ar), 123.02 (s, Ar), 120.97 (m, Ar), 120.15 (s,  $J_{\text{PC}}=64.53$  Hz, Ar), 118.77 (d,  $J=17.45$  Hz, Ar), 110.26 (d,  $J=21.45$  Hz, Ar), 38.42 (d,  $J_{\text{PC}}=12.45$  Hz,  $^t\text{Bu}$ ), 31.74 (d,  $J_{\text{PC}}=7.16$  Hz,  $^t\text{Bu}$ ), 26.67 (br-s, Me-Ar);  $^{31}\text{P}\{^1\text{H}\}$  87.1 (d,  $J_{\text{PF}}=7$  Hz,  $J_{\text{PtP}}=2232$  Hz);  $^{19}\text{F}$  NMR  $-118.1$  (1F, br-s, 4- $\text{FC}_6\text{H}_4$ ). HRMS ESI: found for  $\text{C}_{27}\text{H}_{31}\text{FNPPt}$  [ $\text{M-MeCN}$ ] $^+$

(calc.) 573.1618 (573.1618); Elemental Analysis: Found: C, 52.32; H, 5.38; Calc. for C<sub>27</sub>H<sub>28</sub>D<sub>3</sub>FNPPt: C, 52.51; H, 5.55.

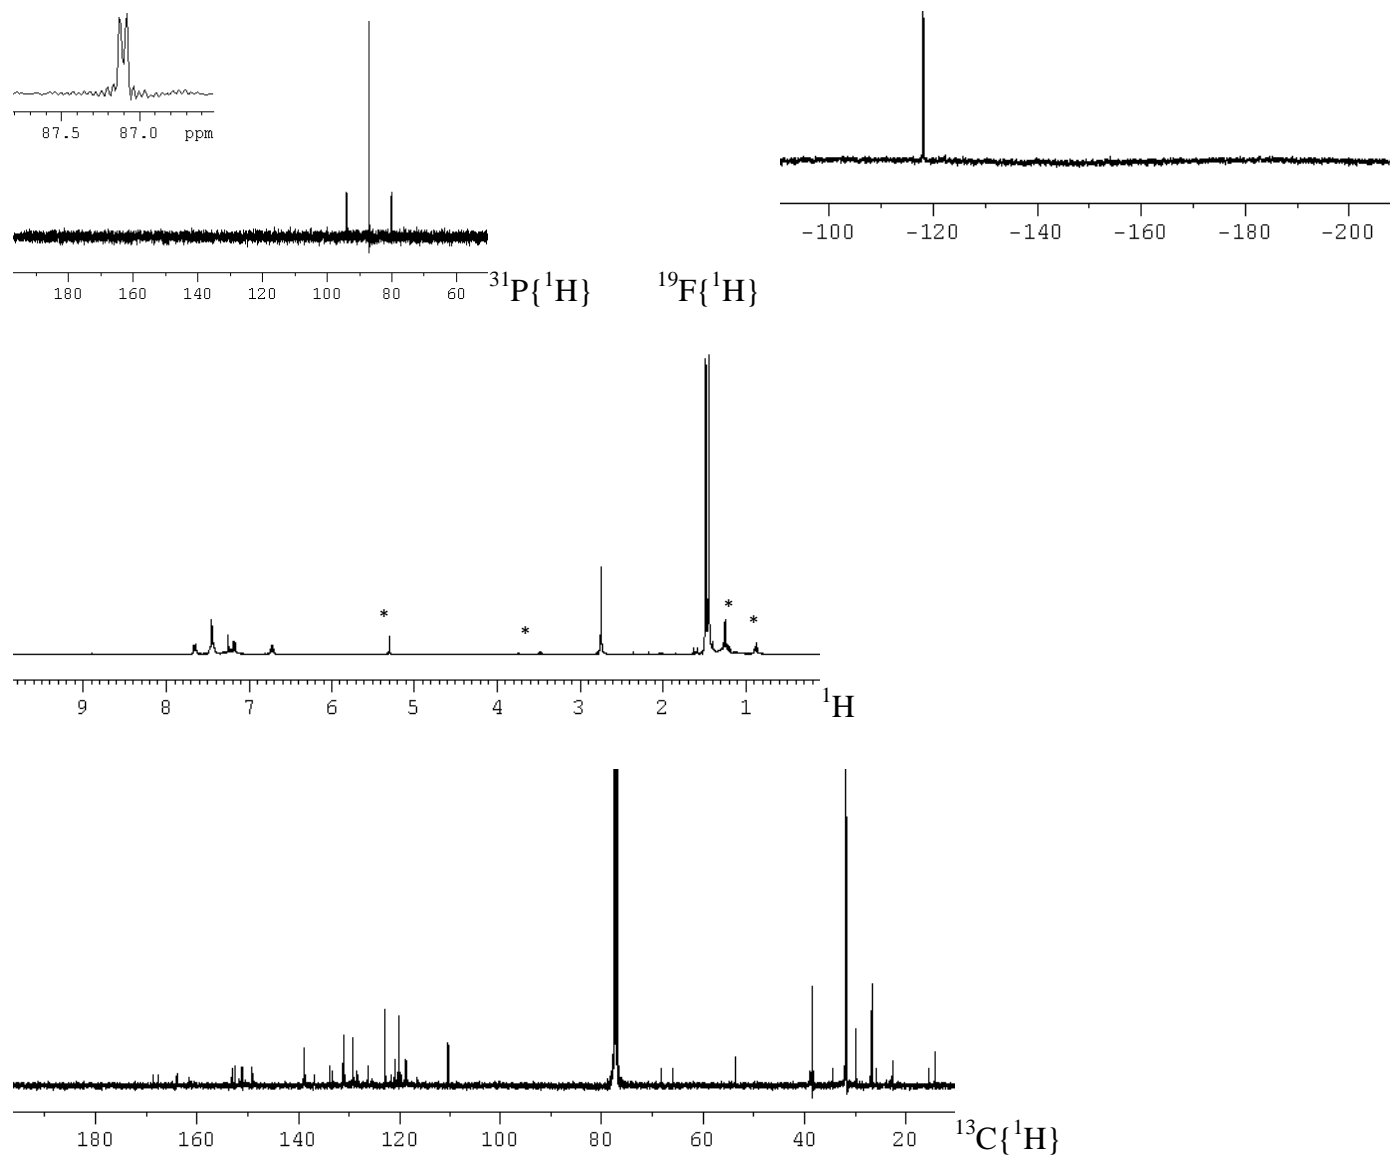

**5b:** <sup>1</sup>H NMR (CDCl<sub>3</sub>) δ 7.67 (1H, dd, J<sub>HH</sub>= 8.07 Hz, J<sub>HH</sub>= 2.07 Hz, Ar), 7.46 (2H, m, Ar), 7.22 (1H, dd, J<sub>HH</sub>= 8.30 Hz, J<sub>HH</sub>= 2.79 Hz, Ar), 7.05 (1H, m, Ar), 6.50 (1H, m, Ar), 2.76 (3H, m, Me-Ar), 1.48 (18H, d, J<sub>PH</sub>= 14.38 Hz, <sup>t</sup>Bu); <sup>13</sup>C{<sup>1</sup>H} 168.33 (dd, J<sub>FC</sub>= 234.56 Hz, J= 11.36 Hz, Ar), 161.89 (dd, J<sub>FC</sub>= 240.03 Hz, J= 13.73 Hz, Ar), 151.12 (m, Ar), 150.83 (m, Ar), 149.23 (m, Ar), 138.91 (s, J<sub>PC</sub>= 30.04 Hz, Ar), 134.52 (d, J<sub>PC</sub>= 34.44 Hz, Ar), 131.71 (d, J<sub>PC</sub>= 13.39 Hz, Ar), 130.89 (d, J<sub>PC</sub>= 2.03 Hz, Ar), 130.28 (d, J<sub>PC</sub>= 7.64 Hz, Ar), 129.19 (s, Ar), 128.38 (s, Ar), 122.78 (s, Ar), 120.63 (s, J<sub>PC</sub>= 57.90 Hz, Ar), 104.03 (m, Ar), 100.72 (ddd, J= 21.45 Hz, J=

23.04 Hz,  $J = 4.59$  Hz, Ar), 39.12 (d,  $J_{PC} = 13.26$  Hz,  $^t$ Bu), 31.88 (m,  $J_{PC} = 6.39$  Hz,  $^t$ Bu), 27.07 (s, Me-Ar);  $^{31}\text{P}\{^1\text{H}\}$  87.6 (d,  $J_{PF} = 11$  Hz,  $J_{PiP} = 2499$  Hz);  $^{19}\text{F}$  NMR  $-99.0$  (1F, m,  $J_{PF} = 132$  Hz, 3,5- $\text{F}_2\text{C}_6\text{H}_3$ ),  $-118.2$  (1F, m, 3,5- $\text{F}_2\text{C}_6\text{H}_3$ ); HRMS APPI: found for  $\text{C}_{27}\text{H}_{30}\text{F}_2\text{NPt} [\text{M-MeCN}]^+$  (calc.) 591.1520 (591.1524).

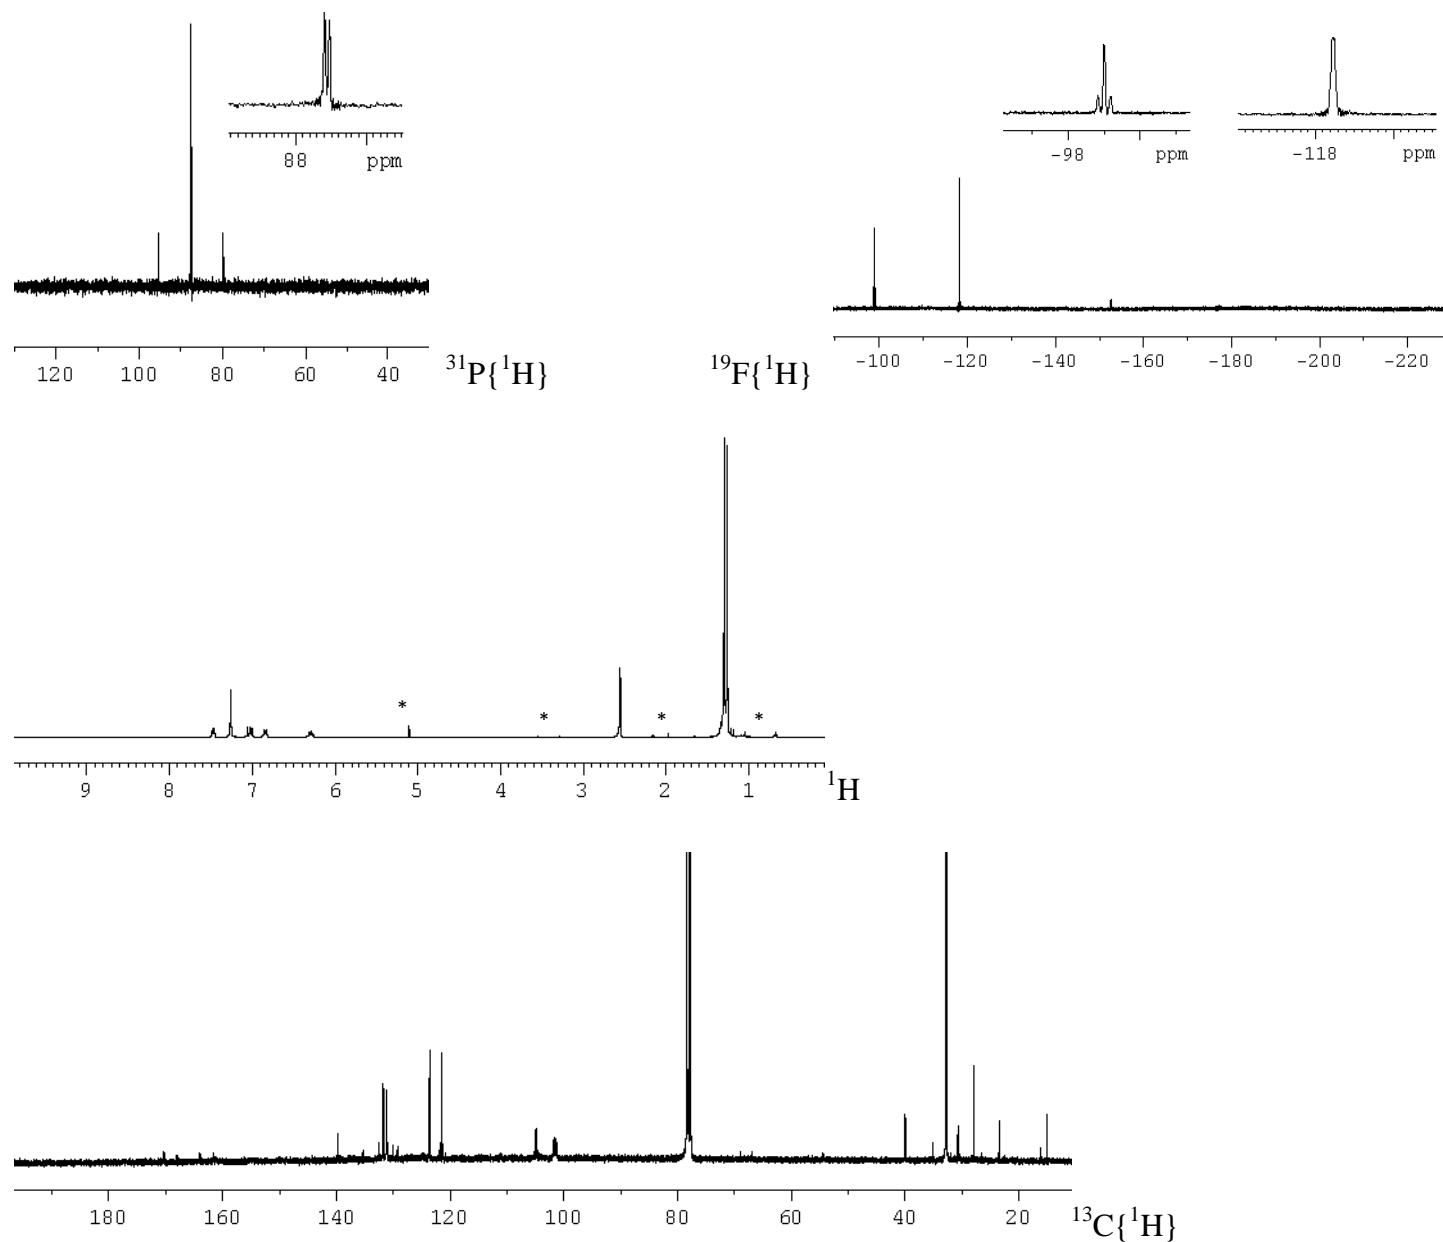

**5c:**  $^1\text{H}$  NMR ( $\text{CDCl}_3$ )  $\delta$  9.02 (2H, m, Py), 7.84 (1H, m, Py), 7.66 (1H, m, Ar), 7.51 (3H, m, Ar+ Py), 7.45 (1H, m, Ar), 7.42 (1H, m, Ar), 7.17 (1H, dd,  $J_{HH} = 8.33$  Hz,  $J_{HH} = 2.52$  Hz, Ar), 6.52 (1H, dd,  $J_{HH} = 8.18$  Hz,  $J_{HH} = 2.62$  Hz, Ar), 5.31 (1H, m,  $J_{PH} = 53.80$  Hz, Ar), 3.55 (3H, m, Ar-OMe), 2.75 (3H, m, Me-Ar), 1.42 (18H, d,  $J_{PH} = 14.28$  Hz  $^t$ Bu);  $^{13}\text{C}\{^1\text{H}\}$  170.03 (d,  $J_{FC} = 106.22$  Hz, Ar), 158.70 (d,  $J_{PC} = 8.90$  Hz,  $J_{PC} = 59.94$  Hz, Ar), 153.31 (m, Py), 151.31 (m, Ar), 151.14 (d,  $J_{PC} = 23.24$  Hz, Ar), 149.83 (m, Ar), 148.29 (m, Ar), 138.45 (m,  $J_{PC} = 27.45$



Hz, Ar), 136.62 (s, Py), 134.36 (d,  $J_{PC} = 32.53$  Hz, Ar), 131.00 (d,  $J_{PC} = 13.39$  Hz, Ar), 130.78 (d,  $J_{PC} = 2.03$  Hz, Ar), 129.00 (d,  $J_{PC} = 7.24$  Hz, Ar), 126.25 (s,  $J_{PtC} = 25.56$  Hz, Py), 122.57 (s, Ar), 120.77 (d,  $J_{PC} = 4.50$  Hz,  $J_{PtC} = 65.95$  Hz, Ar), 119.94 (s,  $J_{PtC} = 61.52$  Hz, Ar), 118.24 (m,  $J_{PtC} = 41.33$  Hz, Ar), 108.86 (s, Ar), 54.98 (s, Ar-OMe), 38.80 (d,  $J_{PC} = 11.65$  Hz,  $^t$ Bu), 31.80 (d,  $J_{PC} = 7.01$  Hz,  $^t$ Bu), 26.93 (m, Me-Ar);  $^{31}\text{P}\{^1\text{H}\}$  87.34 (s,  $J_{PtP} = 2167$  Hz); HRMS APPI: found for  $\text{C}_{28}\text{H}_{31}\text{D}_3\text{NOPt} [\text{M-CD}_3\text{CN}]^+$  (calc.) 585.1812 (585.1818).

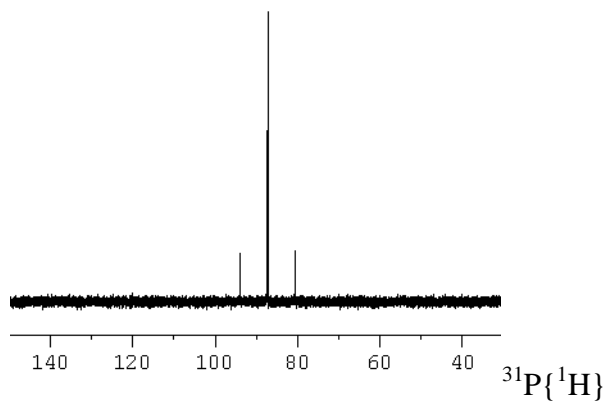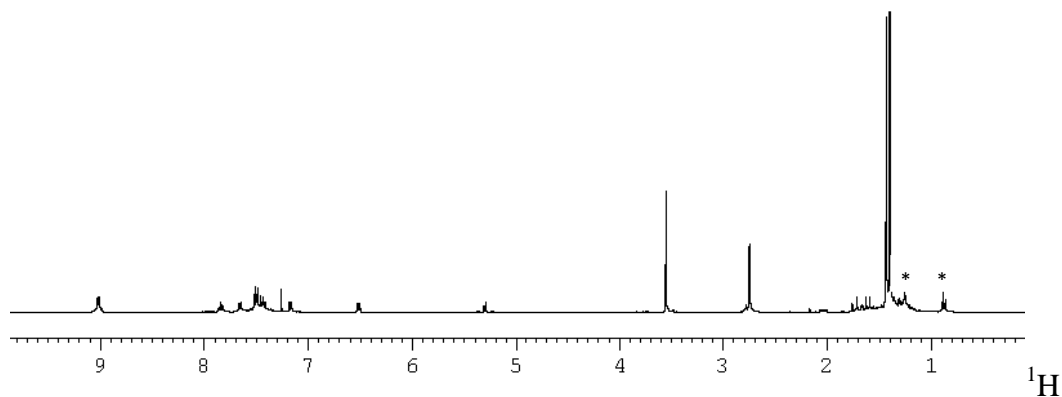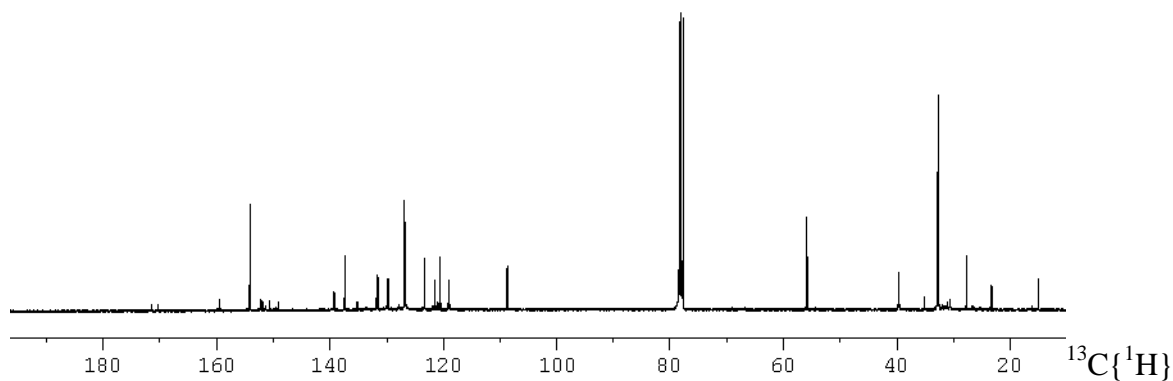

**5d:**  $^1\text{H}$  NMR ( $\text{CD}_3\text{CN}$ )  $\delta$  8.35 (2H, m, Py), 7.47 (1H, m, Py), 7.22 (1H, m, Ar), 7.14 (2H, m, Py), 6.88 (1H, br-d,  $J_{HH} = 8.65$  Hz, Ar), 6.71 (1H, m, Ar), 6.68 (1H, m, Ar), 6.61 (1H, m, Ar), 5.94 (1H, td,  $J_{HH} = 7.31$  Hz,  $J_{HH} =$

1.70 Hz, Ar), 4.87 (1H, t,  $J_{\text{HH}} = 6.70$  Hz,  $J_{\text{PtH}} = 47.36$  Hz, Ar), 2.77 (3H, s, Me-Ar), 2.01 (3H, s, Me-Ar), 0.78 (18H, d,  $J_{\text{PH}} = 14.03$  Hz  $^t\text{Bu}$ );  $^{31}\text{P}\{^1\text{H}\}$  87.26 (s,  $J_{\text{PtP}} = 2109.8$  Hz).

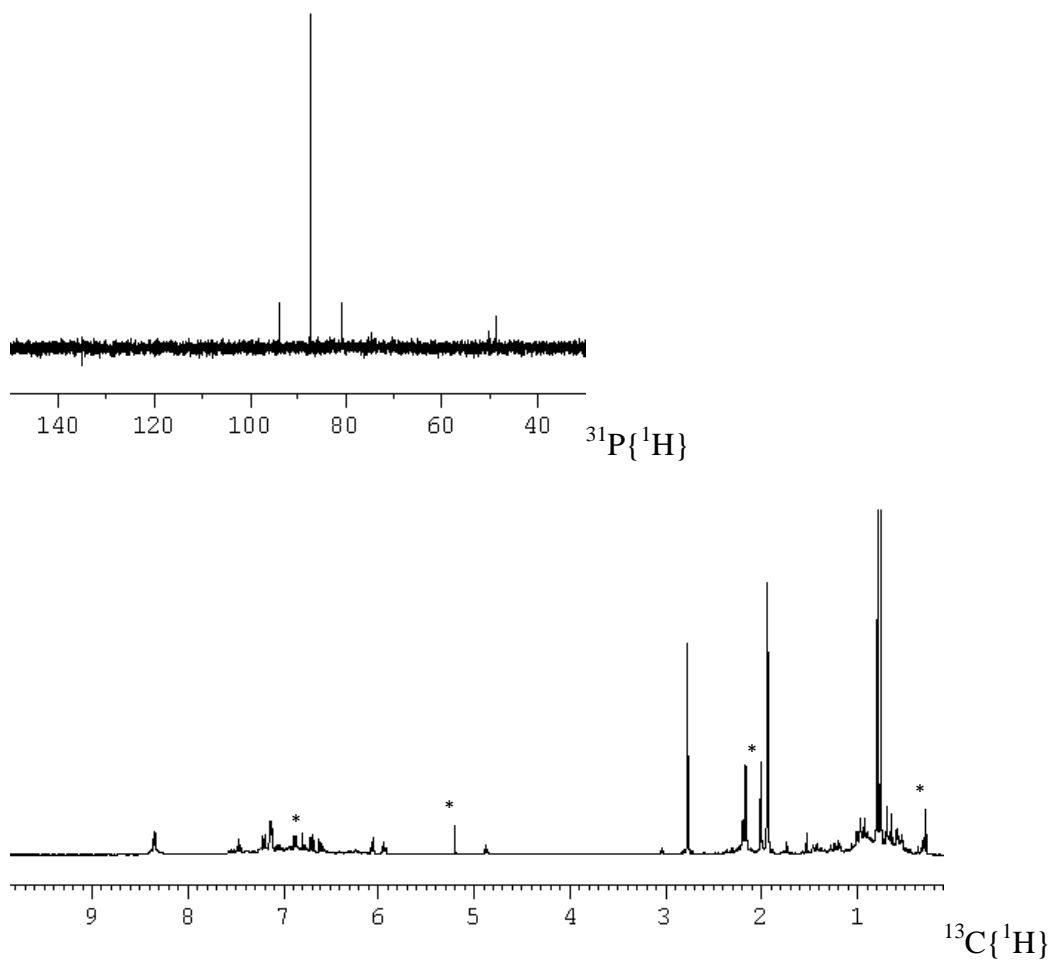

### Characterization of complexes 6

**6a:**  $^{31}\text{P}\{^1\text{H}\}$  16.5 (d,  $J_{\text{FP}} = 7$  Hz,  $J_{\text{PtP}} = 1061$  Hz);  $^{19}\text{F}$  NMR  $-122.6$  (1F, m, 4- $\text{FC}_6\text{H}_4$ ),  $-261.1$  (1F, m, Pt-F);

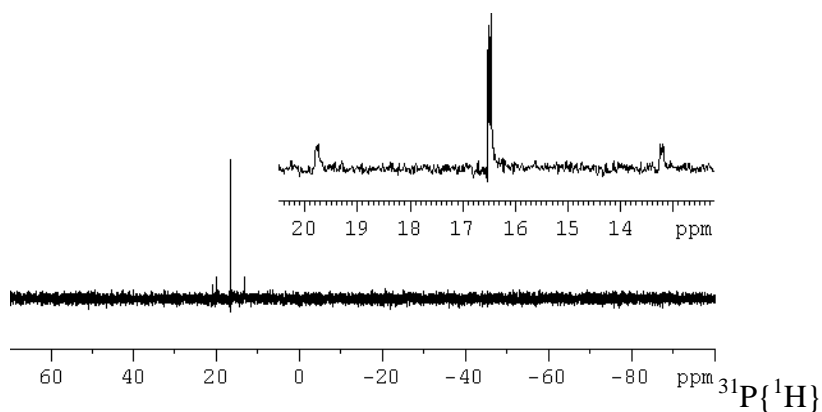

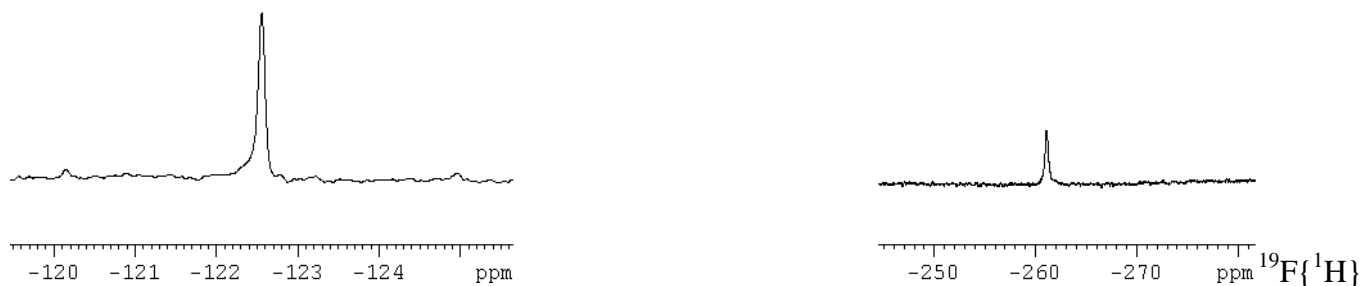

**6b:**  $^1\text{H}$  NMR  $\delta$  8.79 (2H, m, Py), 7.88 (1H, m, Ar), 7.80 (1H, m, Py), 7.60 (1H, m, Ar), 7.41 (1H, dd,  $J_{\text{HH}}=7.82$  Hz,  $J_{\text{HH}}=2.79$  Hz, Ar), 7.36 (2H, m, Py), 7.08 (2H, m, Ar), 6.77 (2H, m, 3,5- $\text{F}_2\text{C}_6\text{H}_3$ ), 6.49 (1H, tt,  $J_{\text{FH}}=9.19$  Hz,  $J_{\text{HH}}=2.07$  Hz, 3,5- $\text{F}_2\text{C}_6\text{H}_3$ ), 2.76 (3H, m, Me-Ar), 2.00 (3H, d,  $J_{\text{PH}}=15.60$  Hz,  $^t\text{Bu}$ ), 1.25 (9H, d,  $J_{\text{PH}}=15.60$  Hz,  $^t\text{Bu}$ ), 1.14 (3H, d,  $J_{\text{PH}}=15.60$  Hz,  $^t\text{Bu}$ ), 0.82 (2H, m,  $\text{CH}_2\text{-Pt}$ );  $^{13}\text{C}\{^1\text{H}\}$  162.14 (dm,  $J_{\text{FC}}=253.58$  Hz, 3,5- $\text{F}_2\text{C}_6\text{H}_4$ ), 161.74 (m, 3,5- $\text{F}_2\text{C}_6\text{H}_4$ ), 149.91 (d,  $J_{\text{PC}}=27.27$  Hz, Ar), 149.30 (m, Py), 141.48 (s,  $J_{\text{PC}}=18.32$  Hz, Ar), 138.37 (s, Ar), 136.78 (s, Py), 132.81 (d,  $J_{\text{PC}}=13.10$  Hz, Ar), 132.37 (m, Ar), 129.40 (d,  $J_{\text{PC}}=7.60$  Hz, Ar), 129.17 (s, Ar), 126.65 (m,  $J_{\text{PC}}=62.08$  Hz, Ar), 125.45 (m, Py), 124.78 (s, Ar), 115.23 (d,  $J_{\text{FC}}=18.02$  Hz, 3,5- $\text{F}_2\text{C}_6\text{H}_3$ ), 99.05 (t,  $J_{\text{FC}}=25.30$  Hz, 3,5- $\text{F}_2\text{C}_6\text{H}_3$ ), 37.00 (m,  $^t\text{Bu}$ ), 34.25 (m,  $^t\text{Bu}$ ), 32.09 (d,  $J_{\text{PC}}=4.20$  Hz,  $^t\text{Bu}$ ), 30.92 (d,  $J_{\text{PC}}=4.44$  Hz,  $^t\text{Bu}$ ), 26.51 (m, Me-Ar), 25.17 (d,  $J_{\text{PC}}=9.65$  Hz,  $^t\text{Bu}$ ), 14.33 (m,  $J_{\text{PC}}=521.47$  Hz,  $\text{CH}_2\text{-Pt}$ );  $^{31}\text{P}\{^1\text{H}\}$  14.9 (m,  $J_{\text{PtP}}=1051$  Hz);  $^{19}\text{F}$  NMR -114.3 (2F, m, 3,5- $\text{F}_2\text{C}_6\text{H}_3$ ), -176.3 (1F, br s, PtF-HF), -257.1 (1F, m, PtF-HF);

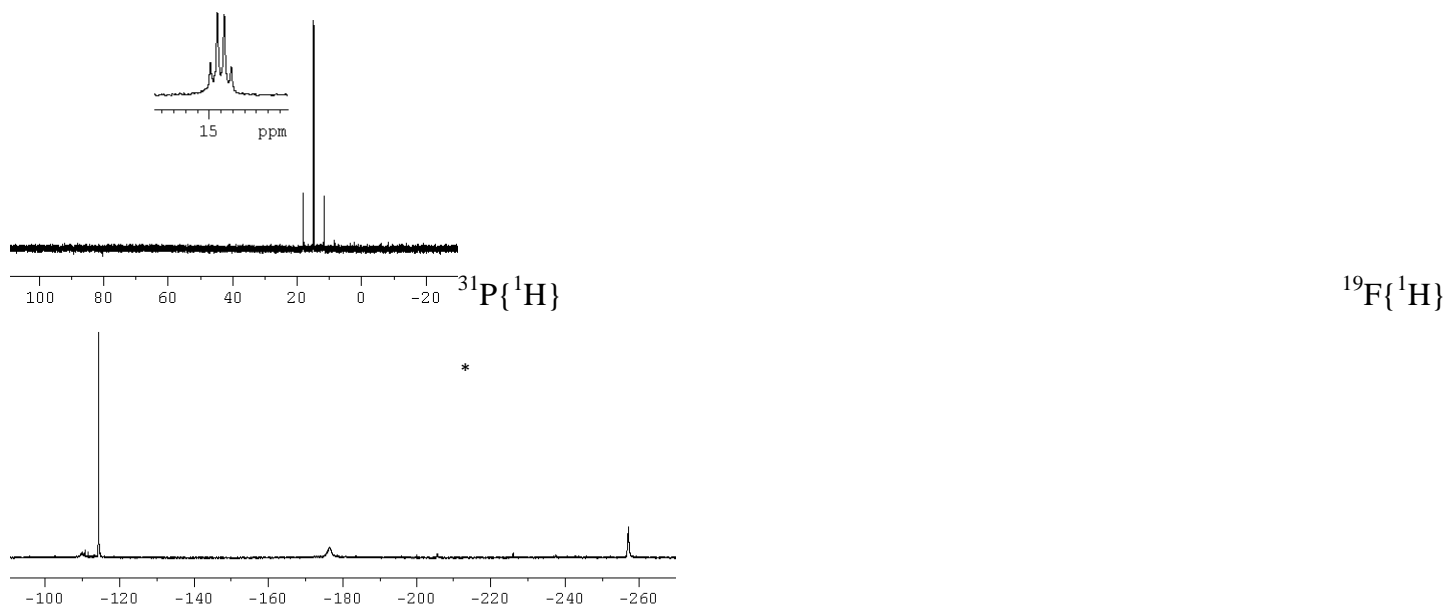

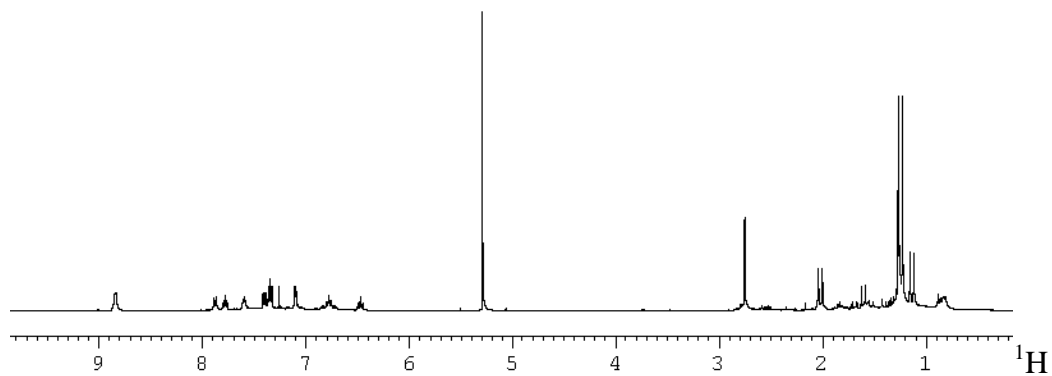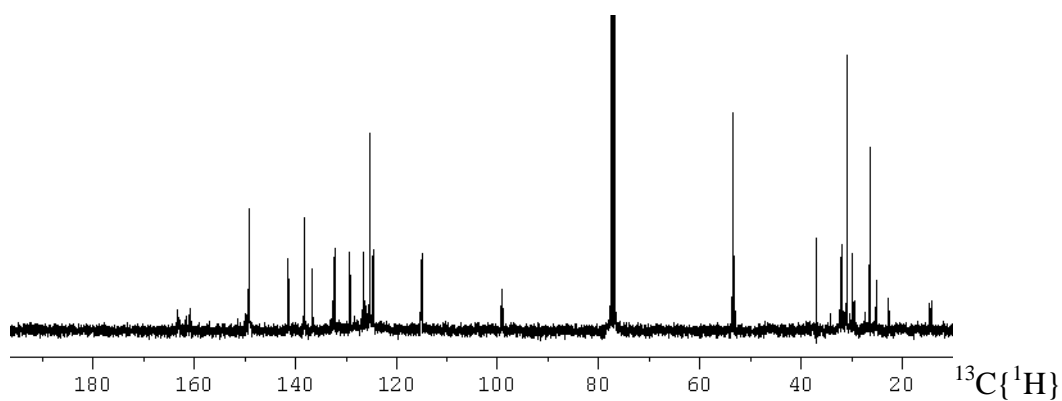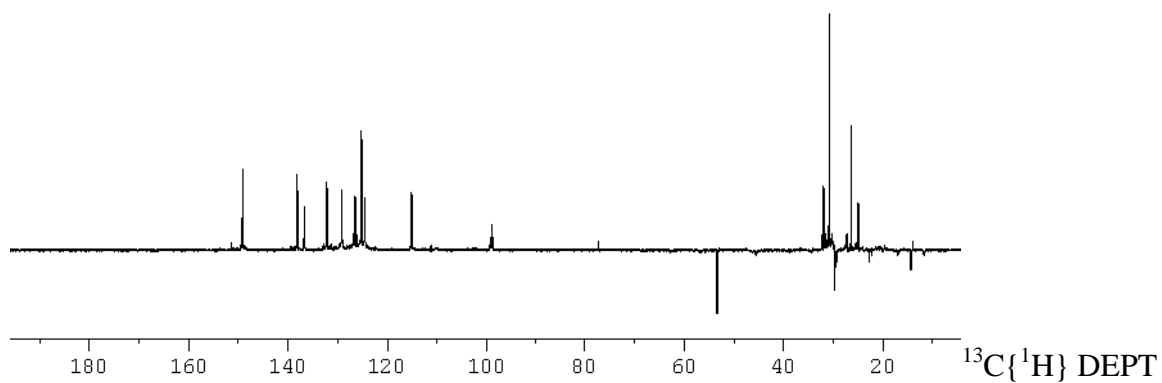

When 1 equiv. of  $(i\text{-Pr})_2\text{NEt}$  was added to a solution of **6b** in  $\text{CD}_3\text{CN}$ , complex **6b'** was formed as evident from the disappearance of the broad signal of  $\text{Pt-F}\cdots\text{HF}$  at  $-177$  ppm and X-ray analysis.

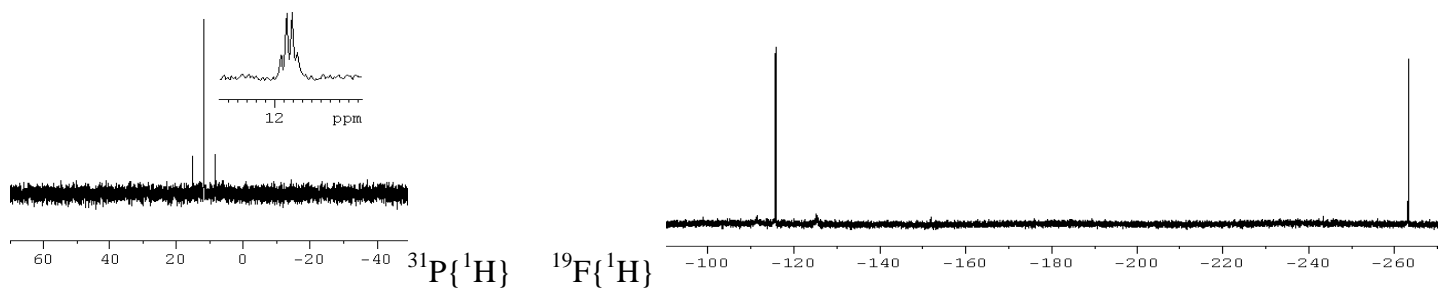

**6e:** This complex was obtained under a typical procedure for fluorination of **3** with XeF<sub>2</sub> and exists as a mixture of two compounds in acetonitrile while only one is observed in CH<sub>2</sub>Cl<sub>2</sub> or chloroform.

CD<sub>3</sub>CN: <sup>31</sup>P{<sup>1</sup>H} 21.7 (m, J<sub>PtP</sub>= 1379 Hz), 9.0 (m, J<sub>PtP</sub>= 1457 Hz); <sup>19</sup>F NMR -120.4 (2F, m, C<sub>6</sub>F<sub>5</sub>), -121.9 (1F, m, C<sub>6</sub>F<sub>5</sub>), -123.3 (1F, m, C<sub>6</sub>F<sub>5</sub>), -162.3 (1F, m, C<sub>6</sub>F<sub>5</sub>), -164.1 (1F, m, C<sub>6</sub>F<sub>5</sub>), -164.7 (2F, m, C<sub>6</sub>F<sub>5</sub>), -166.0 (1F, m, C<sub>6</sub>F<sub>5</sub>), -166.7 (1F, m, C<sub>6</sub>F<sub>5</sub>), -169.9 (1F, m, PtF-HF), -276.0 (1F, m, J<sub>PtF</sub>= 184 Hz, Pt-F);

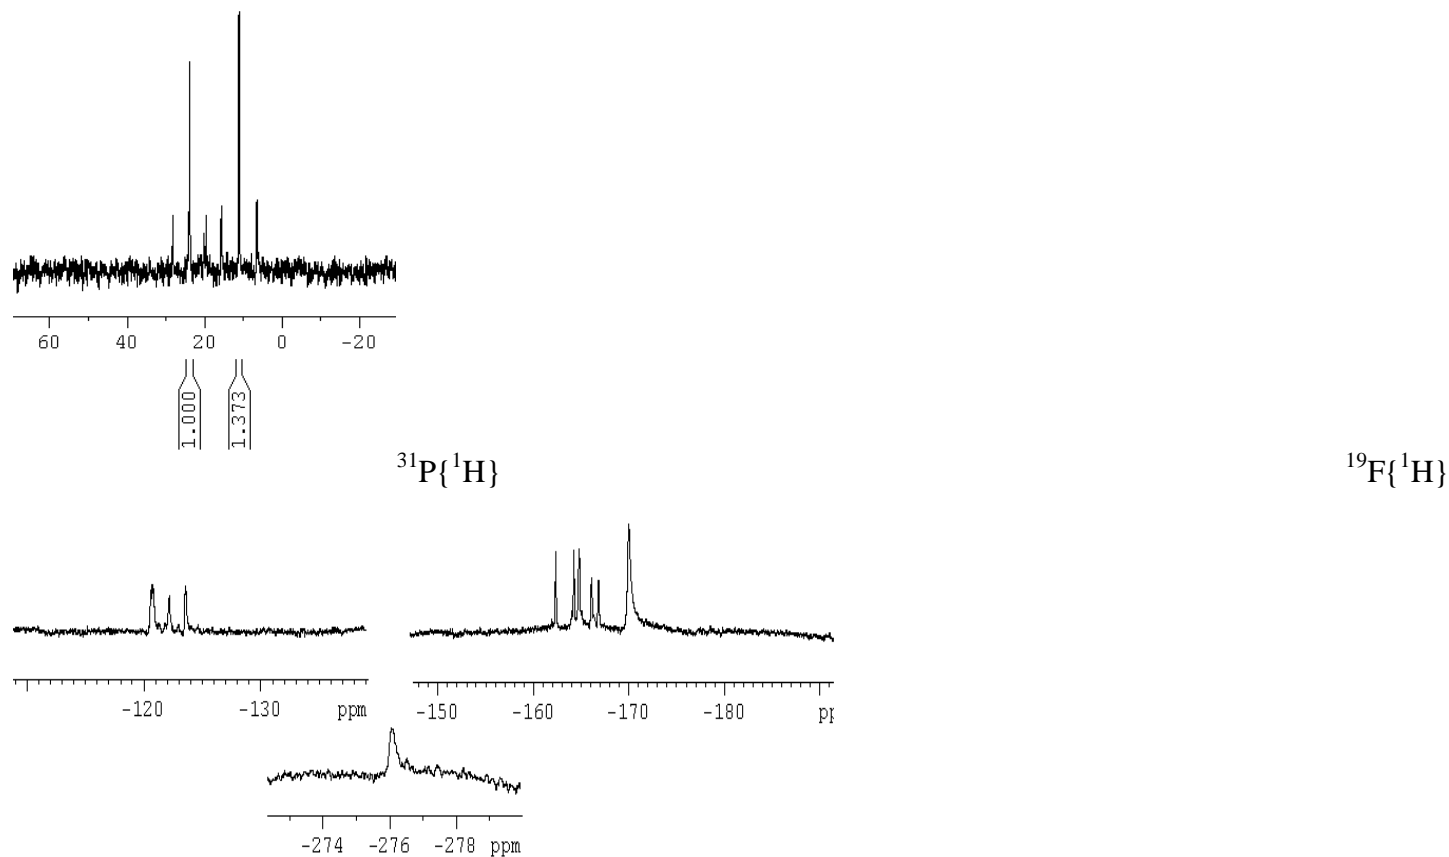

CDCl<sub>3</sub>: <sup>1</sup>H NMR δ 8.82 (2H, m, Py), 7.91 (1H, dm, J<sub>HH</sub>= 8.81 Hz, Ar), 7.73 (1H, m, Py), 7.66 (1H, m, Ar), 7.40 (1H, dd, J<sub>HH</sub>= 8.01 Hz, J<sub>HH</sub>= 2.80 Hz, Ar), 7.30 (2H, m, Py), 7.17 (2H, m, Ar), 2.75 (3H, m, Me-Ar), 2.02 (3H, d, J<sub>PH</sub>= 16.46 Hz, <sup>t</sup>Bu), 1.20 (9H, d, J<sub>PH</sub>= 16.15 Hz, <sup>t</sup>Bu), 1.16 (3H, m, <sup>t</sup>Bu), 1.04 (2H, m, CH<sub>2</sub>-Pt); <sup>31</sup>P{<sup>1</sup>H} 13.4 (m, J<sub>PtP</sub>= 1434 Hz); <sup>19</sup>F NMR -119.6 (1F, m, C<sub>6</sub>F<sub>5</sub>), -122.2 (1F, m, C<sub>6</sub>F<sub>5</sub>), -161.8 (1F, m, C<sub>6</sub>F<sub>5</sub>), -164.2 (1F, m, C<sub>6</sub>F<sub>5</sub>), -165.0 (1F, m, C<sub>6</sub>F<sub>5</sub>), -181.6 (1F, m, PtF-HF), -265.0 (1F, m, J<sub>PtF</sub>= 184 Hz, Pt-F);

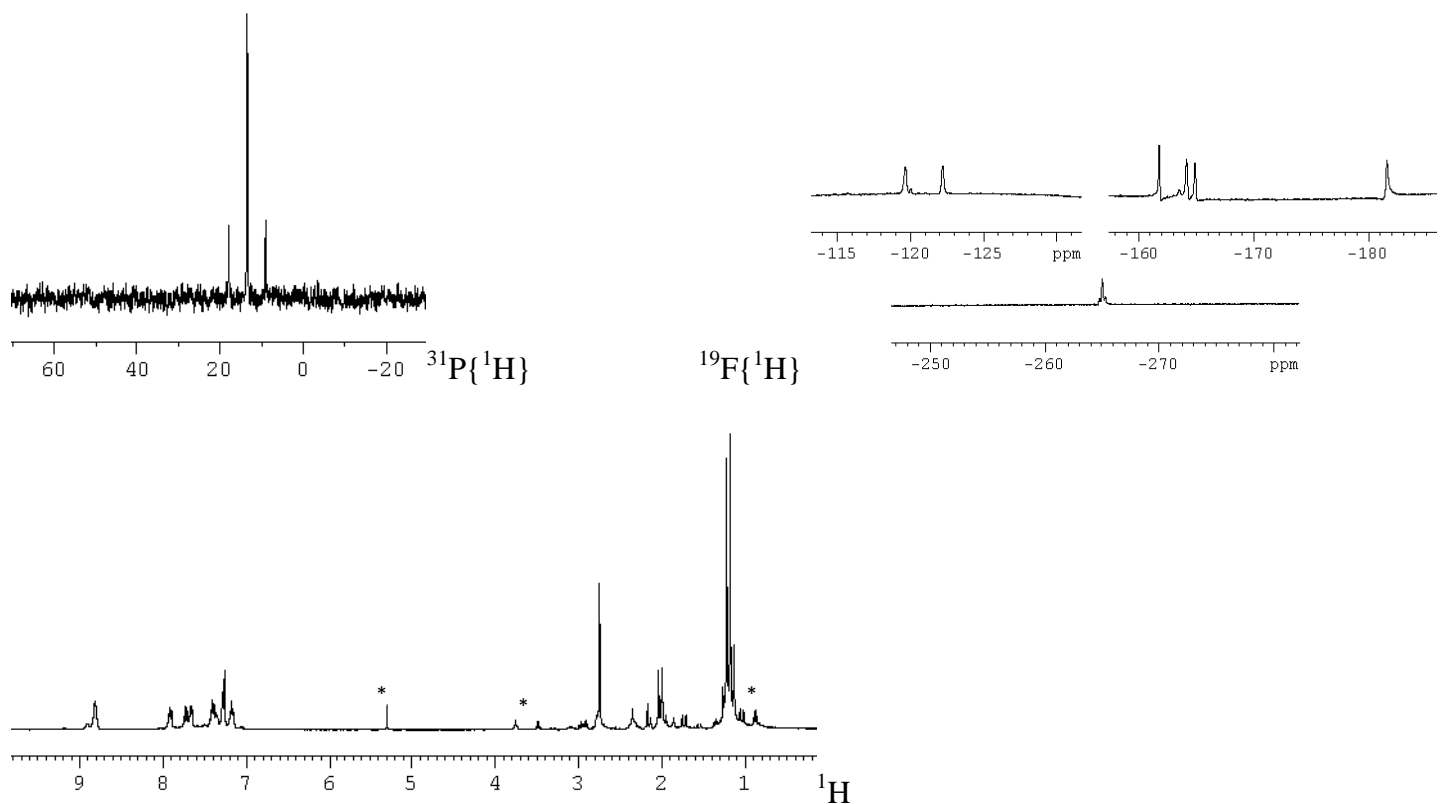

**7:**  $^1\text{H}$  NMR ( $\text{CDCl}_3$ )  $\delta$  8.73 (2H, m, Py), 7.74 (3H, Py+Ar), 7.35 (5H, m, Py+Ar), 3.78 (1H, m,  $-\text{CH}_2-$ ), 3.16 (1H, m,  $-\text{CH}_2-$ ), 2.93 (1H, m,  $-\text{CH}_2-$ ), 2.61 (1H, m,  $-\text{CH}_2-$ ), 1.22 (15H, m,  $^t\text{Bu}$ );  $^{13}\text{C}\{^1\text{H}\}$  158.38 (d,  $J_{\text{PC}}=20.17$  Hz, Ar), 151.10 (s, Py), 137.00 (s, Py), 132.44 (m, Ar), 131.30 (s, Ar), 130.89 (m, Ar), 129.08 (m, Ar), 128.13 (d,  $J_{\text{PC}}=15.30$  Hz, Ar), 127.27 (m, Ar), 126.07 (m, Ar), 125.60 (d,  $J_{\text{PC}}=2.79$  Hz, Ar), 124.31 (s, Py), 44.19 (m,  $-\text{CH}_2-$ ), 39.73 (m,  $^t\text{Bu}$ ), 33.92 (m,  $\text{CH}_2\text{-Pt}$ ), 31.35 (m,  $^t\text{Bu}$ ), 29.85 (m,  $^t\text{Bu}$ ), 26.60 (m,  $^t\text{Bu}$ );  $^{31}\text{P}\{^1\text{H}\}$  48.0 (s,  $J_{\text{PP}}=4144$  Hz); problem  $^{19}\text{F}$  NMR -116.2 (2F, m,  $J_{\text{PF}}=243$  Hz,  $\text{C}_6\text{F}_5$ ), -163.3 (1F, m,  $\text{C}_6\text{F}_5$ ), -163.9 (2F, m,  $\text{C}_6\text{F}_5$ );

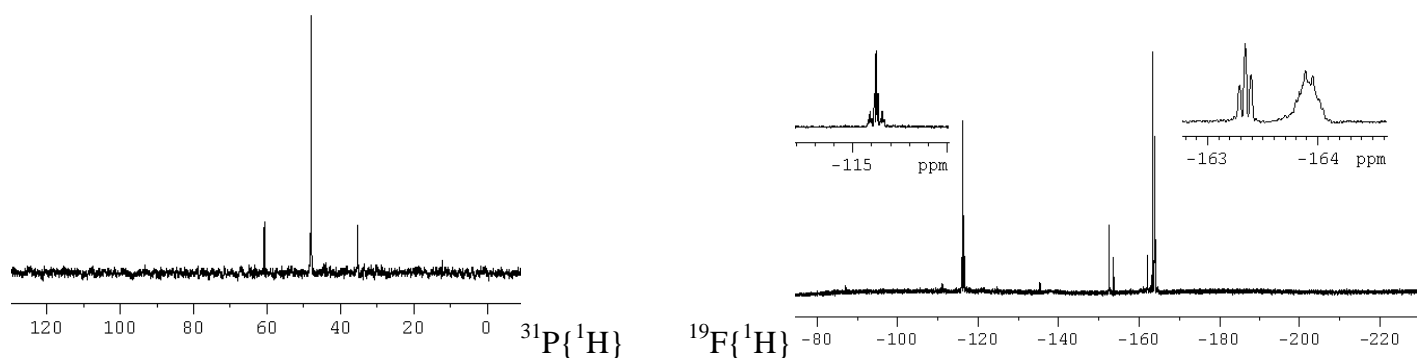

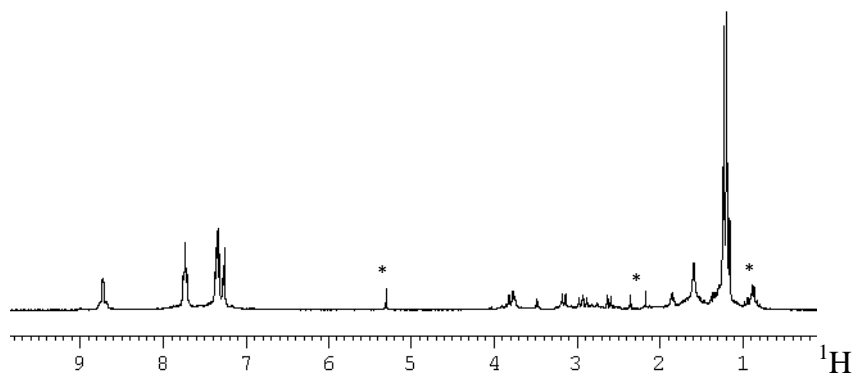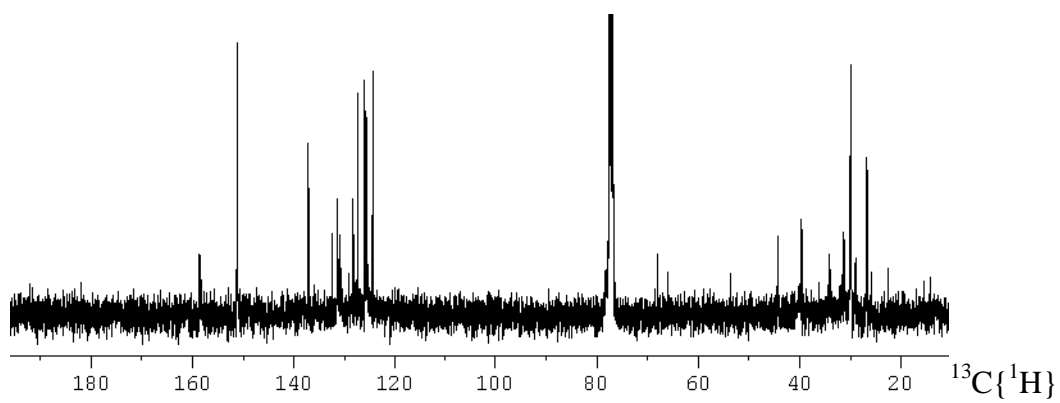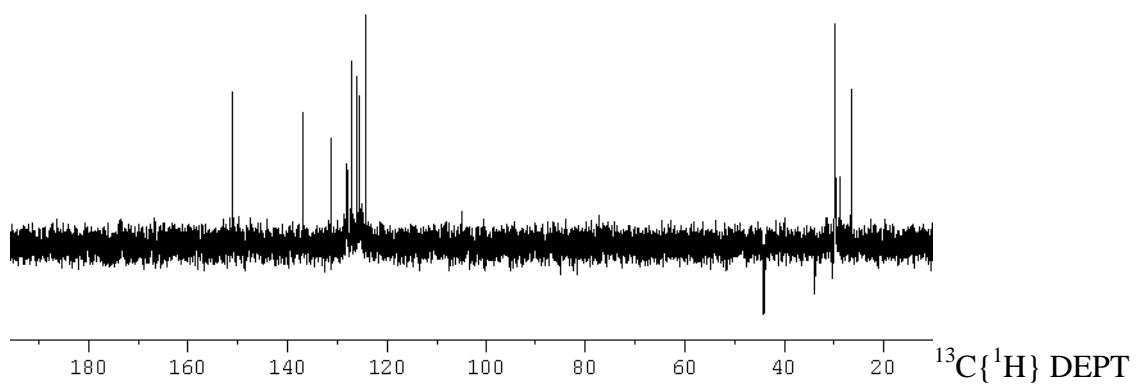

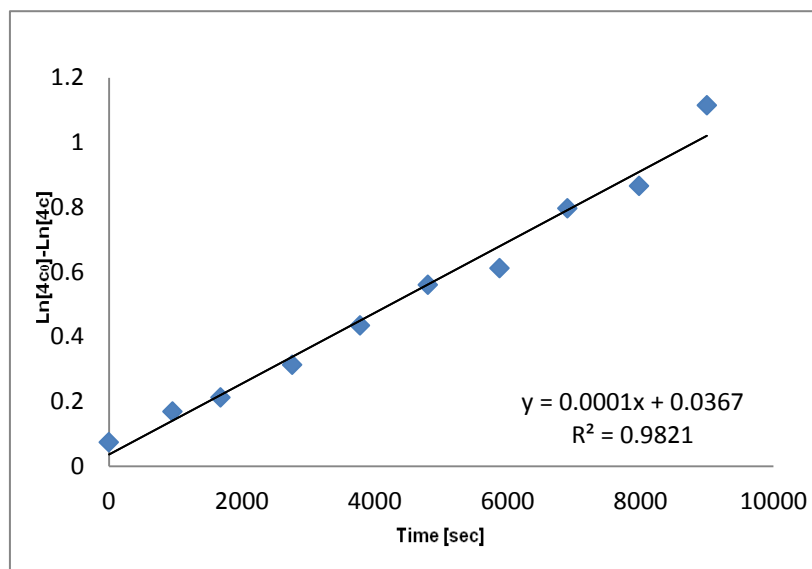

**Figure S1.** First-order kinetics in the conversion of **4c** to **5c** followed by the  $^{31}\text{P}$  NMR spectroscopy in  $\text{CD}_3\text{CN}$  at 298 K.



**DFT-optimized geometries for MeCN, pyridine, py-HF, py-(HF)<sub>2</sub>, complexes 4b, 4c, 5b, 8-15, TS<sub>Pt-C8</sub>, TS<sub>σ-π</sub>, TS<sub>C8-C7</sub> (Ar = 3,5-difluorophenyl and Ar = 4-methoxyphenyl), TS<sub>CHF</sub> and TS<sub>CH-Pt</sub> for gas phase and MeCN solutions**

Drawings are given for all metal complexes with geometry optimized in MeCN solution.

Total solution phase Gibbs energy in MeCN (G<sub>tot</sub>) for 298K is given in Hartrees (1 Hartree = 627.51 kcal/mol).

Reaction Gibbs energies in kcal/mol were calculated as  $627.51 * [\Sigma(G_{tot})_{products} - \Sigma(G_{tot})_{reactants}]$

**MeCN, gas phase**

Total Gibbs free energy, G<sub>tot</sub> (H<sub>tot</sub> - T\*S): -132.563057 hartrees

|    |               |               |               |
|----|---------------|---------------|---------------|
| C1 | -0.0020533289 | -0.1622928395 | 0.0000000000  |
| N2 | -0.0174520205 | -1.3352946620 | 0.0000000000  |
| C3 | 0.0169133719  | 1.2970889583  | 0.0000000000  |
| H4 | 1.0544888475  | 1.6670986946  | 0.0000000000  |
| H5 | -0.4944701739 | 1.6870650366  | 0.8943243650  |
| H6 | -0.4944701739 | 1.6870650366  | -0.8943243650 |

**MeCN, acetonitrile solution**

Total Gibbs free energy, G<sub>tot</sub> (H<sub>tot</sub> - T\*S): -132.575749 hartrees

The solvation energy: -7.9133 kcal/mol

|    |               |               |               |
|----|---------------|---------------|---------------|
| C1 | -0.0017362016 | -0.1590720835 | 0.0000000000  |
| N2 | -0.0173501115 | -1.3339031188 | 0.0000000000  |
| C3 | 0.0170394715  | 1.2949070476  | 0.0000000000  |
| H4 | 1.0595115977  | 1.6579469403  | 0.0000000000  |
| H5 | -0.4967337234 | 1.6776139855  | 0.8989389092  |
| H6 | -0.4967337234 | 1.6776139855  | -0.8989389092 |

**Pyridine, gas phase**

Total Gibbs free energy, G<sub>tot</sub> (H<sub>tot</sub> - T\*S): -247.910559 hartrees

|     |               |               |               |
|-----|---------------|---------------|---------------|
| C1  | -0.3439527491 | 1.0579033802  | 0.3774567028  |
| C2  | -1.3116173257 | 0.0454499612  | 0.3649277710  |
| H3  | -0.6059566806 | 2.0788555713  | 0.6725994617  |
| C4  | 0.9665971142  | 0.7342308982  | 0.0043120277  |
| C5  | -0.9218155627 | -1.2452254897 | -0.0214617056 |
| H6  | -2.3488642932 | 0.2482803553  | 0.6478058414  |
| H7  | 1.7579314295  | 1.4897412574  | -0.0019294058 |
| C8  | 1.2476139066  | -0.5894368093 | -0.3645924451 |
| N9  | 0.3320998522  | -1.5767209618 | -0.3835828042 |
| H10 | -1.6570338769 | -2.0600972382 | -0.0415817569 |
| H11 | 2.2650382191  | -0.8743770347 | -0.6623020925 |

### Pyridine, acetonitrile solution

Total Gibbs free energy, Gtot (Htot - T\*S): -247.919329 hartrees

The solvation energy: -5.5562 kcal/mol

|     |               |               |               |
|-----|---------------|---------------|---------------|
| C1  | -0.3457435132 | 1.0607581179  | 0.3715667745  |
| C2  | -1.3152834968 | 0.0468947626  | 0.3588991846  |
| H3  | -0.6076431645 | 2.0823682417  | 0.6675716909  |
| C4  | 0.9669858765  | 0.7369457345  | -0.0025053746 |
| C5  | -0.9282647677 | -1.2451957325 | -0.0270711965 |
| H6  | -2.3542893756 | 0.2475200413  | 0.6418587734  |
| H7  | 1.7607137978  | 1.4918025987  | -0.0096145004 |
| C8  | 1.2511539210  | -0.5863691062 | -0.3717164259 |
| N9  | 0.3314206414  | -1.5780040439 | -0.3904588061 |
| H10 | -1.6668430603 | -2.0569278883 | -0.0457164970 |
| H11 | 2.2699884242  | -0.8669786012 | -0.6682394335 |

### Pyridine-HF, gas phase

Total Gibbs free energy, Gtot (Htot - T\*S): -348.251826 hartrees

|     |               |               |               |
|-----|---------------|---------------|---------------|
| C1  | -0.3778691852 | 1.3627226528  | 0.4010723263  |
| C2  | -1.4374985220 | 0.4465980386  | 0.4300921754  |
| H3  | -0.5391822925 | 2.4083533342  | 0.6801962670  |
| C4  | 0.8908012824  | 0.9163748774  | 0.0085384037  |
| C5  | -1.1850826325 | -0.8816216425 | 0.0646763893  |
| H6  | -2.4436389265 | 0.7515027736  | 0.7299738861  |
| H7  | 1.7456740436  | 1.5968230584  | -0.0284400683 |
| C8  | 1.0475585841  | -0.4293684604 | -0.3389572221 |
| N9  | 0.0313789383  | -1.3161381389 | -0.3131629581 |
| H10 | -1.9850839190 | -1.6302210647 | 0.0733800221  |
| H11 | 2.0074069390  | -0.8511035163 | -0.6547947305 |
| H12 | 0.8172167415  | -2.7027048571 | -0.8082831719 |
| F13 | 1.5915604140  | -3.2063848869 | -1.0980019868 |

### Pyridine-HF, acetonitrile solution

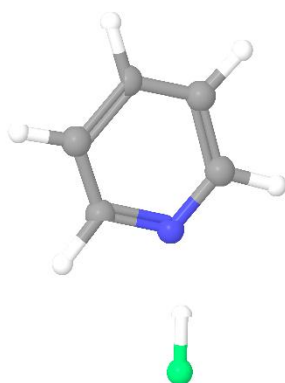

Total Gibbs free energy, Gtot (Htot - T\*S): -348.266784 hartrees

|    |               |              |              |
|----|---------------|--------------|--------------|
| C1 | -0.3649159705 | 1.4090490546 | 0.4179763721 |
| C2 | -1.2961224156 | 0.3592392706 | 0.3901775417 |

|     |               |               |               |
|-----|---------------|---------------|---------------|
| H3  | -0.6696922616 | 2.4166138932  | 0.7214385045  |
| C4  | 0.9637464046  | 1.1469120960  | 0.0495827489  |
| C5  | -0.8599930384 | -0.9110227990 | -0.0045065376 |
| H6  | -2.3423971608 | 0.5177799619  | 0.6697928991  |
| H7  | 1.7221469369  | 1.9361577074  | 0.0571103277  |
| C8  | 1.3125025127  | -0.1553911937 | -0.3317742446 |
| N9  | 0.4183248923  | -1.1676553770 | -0.3596187575 |
| H10 | -1.5467219419 | -1.7647773740 | -0.0442474053 |
| H11 | 2.3387127093  | -0.4043727090 | -0.6270069388 |
| H12 | 0.6193563627  | -2.6582089366 | -0.7450219911 |
| F13 | 0.5849325005  | -3.6315285993 | -0.9573986226 |

### Pyridine-(HF)<sub>2</sub>, gas phase

Total Gibbs free energy, Gtot (Htot - T\*S): -448.604169 hartrees

|     |               |               |               |
|-----|---------------|---------------|---------------|
| C1  | -0.6078906333 | 1.3408526575  | 0.2628994939  |
| C2  | -1.2762377546 | 0.1281328050  | 0.0537400820  |
| H3  | -1.1684316330 | 2.2543877181  | 0.4829696531  |
| C4  | 0.7916019179  | 1.3681612106  | 0.1866393200  |
| C5  | -0.5266674012 | -1.0194408800 | -0.2247032868 |
| H6  | -2.3660928136 | 0.0648084791  | 0.1047606926  |
| H7  | 1.3515993539  | 2.2934383576  | 0.3436049938  |
| C8  | 1.4687563037  | 0.1783981992  | -0.0963455878 |
| N9  | 0.8229325654  | -0.9869564381 | -0.2970086423 |
| H10 | -0.9730540284 | -2.0083222623 | -0.4001480210 |
| H11 | 2.5608361076  | 0.1444601182  | -0.1665617200 |
| H12 | 1.4062302036  | -2.2896652247 | -0.5911404075 |
| F13 | 1.6307564185  | -3.2752347438 | -0.7993214064 |
| H14 | 0.2171654537  | -3.8169702629 | -0.8274677549 |
| F15 | -0.7446609656 | -3.9607571682 | -0.8012752274 |

### Pyridine-(HF)<sub>2</sub>, acetonitrile solution

Time: pyridine\_HF2\_in\_MCN

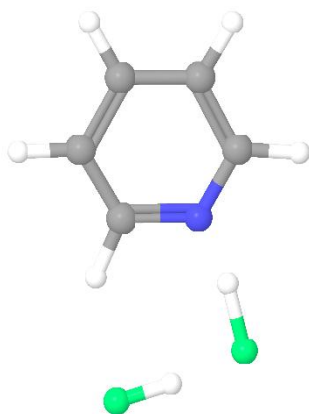

Total Gibbs free energy, Gtot (Htot - T\*S): -448.620652 hartrees

|    |               |              |              |
|----|---------------|--------------|--------------|
| C1 | -0.5949202932 | 1.3551747629 | 0.2697749578 |
| C2 | -1.2943888055 | 0.1557791436 | 0.0609080873 |
| H3 | -1.1373639895 | 2.2797836696 | 0.4952488273 |

|     |               |               |               |
|-----|---------------|---------------|---------------|
| C4  | 0.8075165953  | 1.3582372036  | 0.1869660850  |
| C5  | -0.5690239380 | -1.0031081127 | -0.2237524449 |
| H6  | -2.3864058159 | 0.1135374356  | 0.1179380630  |
| H7  | 1.3843908051  | 2.2744310950  | 0.3445824324  |
| C8  | 1.4701509772  | 0.1611361358  | -0.1016810528 |
| N9  | 0.7821503149  | -0.9847965312 | -0.3003305251 |
| H10 | -1.0254775088 | -1.9847224010 | -0.3970834099 |
| H11 | 2.5610879697  | 0.0979654072  | -0.1800161405 |
| H12 | 1.3005778125  | -2.0917406200 | -0.5470694359 |
| F13 | 1.5941981332  | -3.2140163590 | -0.7786762608 |
| H14 | 0.3012781742  | -3.7709531726 | -0.8182658772 |
| F15 | -0.6568445603 | -4.0595606882 | -0.8208964392 |

#### 4b, gas phase

Total Gibbs free energy, Gtot (Htot - T\*S): -2075.756885 hartrees

|     |               |               |               |
|-----|---------------|---------------|---------------|
| Pt1 | 8.0454877703  | 9.2165679353  | 4.2555212392  |
| P2  | 7.9591163806  | 8.2166426067  | 2.1363063340  |
| F3  | 6.1374329408  | 8.8238280725  | 5.0243670179  |
| F4  | 8.5613559611  | 7.4553583167  | 5.2505676791  |
| C5  | 8.6017245732  | 6.3967590815  | 2.2240321940  |
| C6  | 8.8206148889  | 5.7994655534  | 0.8183183561  |
| H7  | 9.2024430481  | 4.7714147754  | 0.9522398517  |
| H8  | 9.5896984303  | 6.3576057885  | 0.2606358730  |
| H9  | 7.9096134514  | 5.7313442279  | 0.2089955804  |
| C10 | 9.9685342064  | 6.3826309438  | 2.9439766112  |
| H11 | 9.8682437539  | 6.7605811627  | 3.9717950309  |
| H12 | 10.7343063648 | 6.9533437592  | 2.3961372771  |
| H13 | 10.3036509088 | 5.3299032134  | 2.9845066047  |
| C14 | 7.5933106686  | 5.5670763213  | 3.0439472907  |
| H15 | 7.9905898172  | 4.5403782426  | 3.1417891332  |
| H16 | 6.6066256845  | 5.4915259514  | 2.5606187719  |
| H17 | 7.4917696967  | 5.9972829540  | 4.0530579699  |
| C18 | 6.2022619835  | 8.3403690304  | 1.3219251378  |
| C19 | 5.1418886803  | 8.0108626342  | 2.4024555824  |
| H20 | 4.1648799917  | 8.3608671098  | 2.0219126013  |
| H21 | 5.3402052878  | 8.4756635064  | 3.3832710714  |
| H22 | 5.0571134303  | 6.9244735072  | 2.5637319759  |
| C23 | 5.9446193132  | 7.3773364868  | 0.1429245238  |
| H24 | 5.9788915862  | 6.3234962789  | 0.4574444856  |
| H25 | 6.6107657686  | 7.5149151859  | -0.7174629365 |
| H26 | 4.9142910399  | 7.5702115472  | -0.2063049526 |
| C27 | 6.0072011888  | 9.8022312402  | 0.8617178573  |
| H28 | 6.8133271717  | 10.1699576213 | 0.2088415061  |
| H29 | 5.9314209282  | 10.4849683722 | 1.7179749078  |
| H30 | 5.0593009923  | 9.8593342145  | 0.2976610949  |
| N31 | 8.2031630597  | 10.0672917949 | 6.2417595685  |
| C32 | 7.8176673999  | 9.2334528838  | 7.2322163554  |
| H33 | 7.6107891017  | 8.2106383687  | 6.9066878531  |
| C34 | 7.7350872309  | 9.6796344858  | 8.5535914021  |
| H35 | 7.4192835995  | 8.9831301818  | 9.3343689555  |
| C36 | 8.0537159248  | 11.0104462026 | 8.8482485221  |
| H37 | 7.9890192501  | 11.3838094475 | 9.8749332533  |
| C38 | 8.4563593831  | 11.8589107457 | 7.8084128488  |
| H39 | 8.7142198175  | 12.9049464084 | 7.9919901815  |
| C40 | 8.5156627249  | 11.3518458698 | 6.5084444513  |
| H41 | 8.8062673908  | 11.9636492667 | 5.6501837652  |
| C42 | 7.3886789138  | 11.0704575444 | 3.6231062273  |
| C43 | 6.1090085573  | 11.4449637757 | 4.0883082117  |
| H44 | 5.5173184468  | 10.7290667329 | 4.6660440304  |
| C45 | 5.6197968415  | 12.7187614994 | 3.7903598330  |
| C46 | 6.3385078390  | 13.6593254178 | 3.0453064472  |
| H47 | 5.9372795919  | 14.6493102440 | 2.8240836884  |

|     |               |               |               |
|-----|---------------|---------------|---------------|
| C48 | 7.6026987591  | 13.2600052179 | 2.6089918627  |
| C49 | 8.1440325817  | 11.9972803328 | 2.8785550514  |
| H50 | 9.1385338856  | 11.7724976711 | 2.4938817296  |
| F51 | 4.3885825602  | 13.0691960300 | 4.2405352909  |
| F52 | 8.3429873760  | 14.1398891136 | 1.8870086941  |
| C53 | 9.9429066598  | 9.6235314865  | 3.6727451910  |
| C54 | 10.9233817859 | 9.9629500393  | 4.5995157788  |
| H55 | 10.6987391031 | 9.9206781449  | 5.6681567604  |
| C56 | 12.2183772942 | 10.3764789816 | 4.1921307729  |
| H57 | 12.9580564658 | 10.6441796119 | 4.9539222344  |
| C58 | 12.5351055161 | 10.4666234003 | 2.8496485663  |
| H59 | 13.5169946057 | 10.8222429651 | 2.5211865292  |
| C60 | 11.5796654474 | 10.0830918214 | 1.8667757088  |
| C61 | 11.8646039598 | 10.1599785401 | 0.4786790898  |
| H62 | 12.8374682285 | 10.5467403336 | 0.1568490576  |
| C63 | 10.9301054919 | 9.7562569784  | -0.4524291772 |
| H64 | 11.1622412567 | 9.8361146952  | -1.5195854790 |
| C65 | 9.6682935196  | 9.1987875974  | -0.0847281723 |
| C66 | 9.3501133303  | 9.1190560082  | 1.2832113783  |
| C67 | 10.2791126533 | 9.6083596340  | 2.2745453939  |
| C68 | 8.7924972721  | 8.7407240771  | -1.2296573968 |
| H69 | 8.5911670335  | 7.6586509455  | -1.1933111553 |
| H70 | 9.2893294276  | 8.9451042520  | -2.1903813793 |
| H71 | 7.8213873683  | 9.2594218908  | -1.2484045262 |

#### 4b, acetonitrile solution

Totals: 2075.781772 hartrees

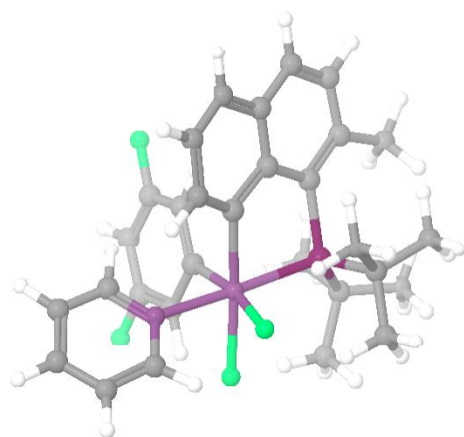

Total Gibbs free energy, Gtot (Htot - T\*S): -2075.781772 hartrees

|     |              |              |              |
|-----|--------------|--------------|--------------|
| Pt1 | 8.0350016631 | 9.1880121935 | 4.2809769573 |
| P2  | 7.9526824158 | 8.2171605155 | 2.1219640327 |
| F3  | 6.1041465663 | 8.7714548632 | 5.0673628510 |
| F4  | 8.5547796001 | 7.4138866736 | 5.2983785765 |
| C5  | 8.5975152549 | 6.3930672389 | 2.1704905771 |
| C6  | 8.8390658265 | 5.8282319842 | 0.7542179513 |
| H7  | 9.2286772012 | 4.8002797526 | 0.8722378250 |
| H8  | 9.6091908991 | 6.4044407032 | 0.2166576502 |
| H9  | 7.9359483241 | 5.7650245154 | 0.1329400006 |
| C10 | 9.9518820989 | 6.3687218959 | 2.9119565428 |

|     |               |               |               |
|-----|---------------|---------------|---------------|
| H11 | 9.8293768669  | 6.7275666436  | 3.9442436540  |
| H12 | 10.7199498930 | 6.9612394446  | 2.3911188811  |
| H13 | 10.2953664451 | 5.3179036506  | 2.9324287371  |
| C14 | 7.5852948751  | 5.5355214437  | 2.9569311120  |
| H15 | 7.9892017131  | 4.5089792241  | 3.0338151631  |
| H16 | 6.6043384847  | 5.4639487330  | 2.4612646799  |
| H17 | 7.4682436701  | 5.9405268893  | 3.9748296167  |
| C18 | 6.1975159854  | 8.3534439959  | 1.2934283837  |
| C19 | 5.1338342509  | 8.0143829590  | 2.3677096103  |
| H20 | 4.1557728497  | 8.3570892876  | 1.9822342606  |
| H21 | 5.3270093740  | 8.4816714383  | 3.3475242044  |
| H22 | 5.0583351639  | 6.9261514884  | 2.5243378610  |
| C23 | 5.9502179906  | 7.3985535245  | 0.1039410410  |
| H24 | 5.9861751642  | 6.3402245806  | 0.4043550658  |
| H25 | 6.6205613298  | 7.5508465059  | -0.7510219711 |
| H26 | 4.9212261556  | 7.5938332645  | -0.2503864331 |
| C27 | 5.9981741062  | 9.8165315808  | 0.8372348294  |
| H28 | 6.8025299590  | 10.1851774403 | 0.1832759211  |
| H29 | 5.9186068105  | 10.4984008529 | 1.6935814981  |
| H30 | 5.0506818478  | 9.8692411150  | 0.2708994652  |
| N31 | 8.2196720928  | 10.0942678712 | 6.2606034434  |
| C32 | 7.8493376233  | 9.3106687686  | 7.2987794020  |
| H33 | 7.6154196652  | 8.2773691839  | 7.0328807011  |
| C34 | 7.8104895954  | 9.8056026301  | 8.6061201511  |
| H35 | 7.5059393727  | 9.1429413021  | 9.4227370081  |
| C36 | 8.1630637682  | 11.1425377664 | 8.8421534694  |
| H37 | 8.1358521615  | 11.5559066687 | 9.8565420342  |
| C38 | 8.5554315667  | 11.9411598683 | 7.7573852150  |
| H39 | 8.8450191470  | 12.9883191247 | 7.8920513431  |
| C40 | 8.5690732814  | 11.3826812954 | 6.4759142085  |
| H41 | 8.8613786008  | 11.9610727368 | 5.5952991767  |
| C42 | 7.3731873189  | 11.0300806422 | 3.6268849378  |
| C43 | 6.0881632966  | 11.4031255528 | 4.0780698836  |
| H44 | 5.5001609214  | 10.6943307534 | 4.6674247892  |
| C45 | 5.5847363838  | 12.6632386376 | 3.7464354845  |
| C46 | 6.2885598016  | 13.5992572553 | 2.9812682370  |
| H47 | 5.8739806048  | 14.5799515837 | 2.7318021370  |
| C48 | 7.5599883931  | 13.1998029599 | 2.5643677745  |
| C49 | 8.1182551160  | 11.9515803178 | 2.8650698194  |
| H50 | 9.1165694374  | 11.7312977684 | 2.4871622085  |
| F51 | 4.3416192362  | 13.0031222171 | 4.1852443439  |
| F52 | 8.2965067576  | 14.0708179890 | 1.8222298944  |
| C53 | 9.9382389630  | 9.5986475936  | 3.7001860535  |
| C54 | 10.9185555370 | 9.9172865113  | 4.6367504641  |
| H55 | 10.6908010570 | 9.8707369594  | 5.7049797171  |
| C56 | 12.2226329752 | 10.3259164931 | 4.2423102768  |
| H57 | 12.9611942171 | 10.5765818526 | 5.0128792571  |
| C58 | 12.5416515148 | 10.4367548605 | 2.8998178634  |
| H59 | 13.5273836437 | 10.7918306861 | 2.5766895598  |
| C60 | 11.5820797272 | 10.0783046395 | 1.9077078476  |

|     |               |               |               |
|-----|---------------|---------------|---------------|
| C61 | 11.8746032263 | 10.1849199485 | 0.5203099036  |
| H62 | 12.8522937478 | 10.5728257470 | 0.2090145271  |
| C63 | 10.9390928320 | 9.8076158152  | -0.4226994296 |
| H64 | 11.1763053188 | 9.9101698327  | -1.4881798418 |
| C65 | 9.6711479046  | 9.2461954679  | -0.0721722092 |
| C66 | 9.3482115709  | 9.1375236402  | 1.2946359774  |
| C67 | 10.2760108650 | 9.6022082612  | 2.3011984111  |
| C68 | 8.8062849870  | 8.8170942549  | -1.2389301218 |
| H69 | 8.5866965447  | 7.7378316338  | -1.2236464727 |
| H70 | 9.3252153597  | 9.0258367791  | -2.1879045244 |
| H71 | 7.8439158301  | 9.3527747268  | -1.2733077293 |



#### 4c, gas phase

Total Gibbs free energy, Gtot (Htot - T\*S): -1991.807605 hartrees

|     |               |               |               |
|-----|---------------|---------------|---------------|
| Pt1 | -0.1383296831 | -0.1021379548 | 1.3976141363  |
| P2  | -0.2915956453 | -1.0355184472 | -0.7429037621 |
| F3  | -2.0361357771 | -0.4979035722 | 2.1906148530  |
| F4  | 0.3717323612  | -1.8969379814 | 2.3577912798  |
| C5  | 0.2826331504  | -2.8789071637 | -0.7066660334 |
| C6  | 0.4496673030  | -3.4674752122 | -2.1228425045 |
| H7  | 0.7913043514  | -4.5119273771 | -2.0077000675 |
| H8  | 1.2311362599  | -2.9352251628 | -2.6885384194 |
| H9  | -0.4741390512 | -3.4912322066 | -2.7159632035 |
| C10 | 1.6631560776  | -2.9553675549 | -0.0166090941 |
| H11 | 1.5974922447  | -2.5932901278 | 1.0201769294  |
| H12 | 2.4374155021  | -2.4026100680 | -0.5711930333 |
| H13 | 1.9608116395  | -4.0200562603 | -0.0013259690 |
| C14 | -0.7390337048 | -3.6794675713 | 0.1261102719  |
| H15 | -0.3869823052 | -4.7250943236 | 0.1925044544  |
| H16 | -1.7419958133 | -3.6993681674 | -0.3288411263 |
| H17 | -0.7911682121 | -3.2654741409 | 1.1460164863  |
| C18 | -2.0495041740 | -0.8224551291 | -1.5374628598 |
| C19 | -3.1130215483 | -1.1229724868 | -0.4513148734 |
| H20 | -4.0744487508 | -0.7096210375 | -0.8073800471 |
| H21 | -2.8765866009 | -0.7021858418 | 0.5408423986  |
| H22 | -3.2545426014 | -2.2078567027 | -0.3201269252 |
| C23 | -2.3610308166 | -1.7556284483 | -2.7273363747 |
| H24 | -2.3670140688 | -2.8148223549 | -2.4292714761 |
| H25 | -1.6997745735 | -1.6321026646 | -3.5935901257 |
| H26 | -3.3863553684 | -1.5146456226 | -3.0614904572 |
| C27 | -2.1832666700 | 0.6529882964  | -1.9774360006 |
| H28 | -1.3701328138 | 0.9891794186  | -2.6386067484 |
| H29 | -2.2116862375 | 1.3295574593  | -1.1136538711 |
| H30 | -3.1354202990 | 0.7599625835  | -2.5273779698 |
| N31 | 0.0720008924  | 0.7088680979  | 3.3925723181  |
| C32 | -0.2976762715 | -0.1357669442 | 4.3795743369  |
| H33 | -0.5227485186 | -1.1511637001 | 4.0419343290  |
| C34 | -0.3411520487 | 0.2915586222  | 5.7092219945  |
| H35 | -0.6457073635 | -0.4123937681 | 6.4878479523  |
| C36 | 0.0029474656  | 1.6136437317  | 6.0153150978  |
| H37 | -0.0290464609 | 1.9718471924  | 7.0490195180  |
| C38 | 0.3894541017  | 2.4728533612  | 4.9781718986  |
| H39 | 0.6672804674  | 3.5122522321  | 5.1706036894  |
| C40 | 0.4070537280  | 1.9854161385  | 3.6694005008  |
| H41 | 0.6782265135  | 2.6065146533  | 2.8115603454  |
| C42 | -0.7829730419 | 1.7795304995  | 0.8220219578  |
| C43 | -2.0473231145 | 2.1659928123  | 1.3095957045  |
| H44 | -2.6248426783 | 1.4298733698  | 1.8778102326  |
| C45 | -2.5685900817 | 3.4486761790  | 1.0707422361  |
| C46 | -1.8190731244 | 4.3847415468  | 0.3358489001  |
| O47 | -2.2261803607 | 5.6632425955  | 0.0383185207  |

|     |               |               |               |
|-----|---------------|---------------|---------------|
| C48 | -0.5485448127 | 4.0172187809  | -0.1438805617 |
| C49 | -0.0395013366 | 2.7341567729  | 0.0956444984  |
| H50 | 0.9490286200  | 2.4905844382  | -0.2997846856 |
| H51 | -3.5570339070 | 3.7001779361  | 1.4649779362  |
| H52 | 0.0293324542  | 4.7536884841  | -0.7109119295 |
| C53 | 1.7532908240  | 0.2864836514  | 0.7925775009  |
| C54 | 2.7561277085  | 0.5852862217  | 1.7102470807  |
| H55 | 2.5454763509  | 0.5304335047  | 2.7810901779  |
| C56 | 4.0568714004  | 0.9689009500  | 1.2926945309  |
| H57 | 4.8136397218  | 1.2030962853  | 2.0489104348  |
| C58 | 4.3599411653  | 1.0688569180  | -0.0522959263 |
| H59 | 5.3485868832  | 1.3977623289  | -0.3886876371 |
| C60 | 3.3811662089  | 0.7269748397  | -1.0275822095 |
| C61 | 3.6542641410  | 0.8099718984  | -2.4175048096 |
| H62 | 4.6364403967  | 1.1674928597  | -2.7453562494 |
| C63 | 2.6983723029  | 0.4444237848  | -3.3424646632 |
| H64 | 2.9231328066  | 0.5257182659  | -4.4111210387 |
| C65 | 1.4236989138  | -0.0769796094 | -2.9669519155 |
| C66 | 1.1171496991  | -0.1631756938 | -1.5967829243 |
| C67 | 2.0715097151  | 0.2855615243  | -0.6103470275 |
| C68 | 0.5247111270  | -0.4942159937 | -4.1102298534 |
| H69 | 0.2676737074  | -1.5639674349 | -4.0704860136 |
| H70 | 1.0314371691  | -0.3190938050 | -5.0718237291 |
| H71 | -0.4188124275 | 0.0737217514  | -4.1317048892 |
| C72 | -3.5131347401 | 6.0568450187  | 0.5004743328  |
| H73 | -3.6535811184 | 7.0928670237  | 0.1594064957  |
| H74 | -4.3153250670 | 5.4227731823  | 0.0766080925  |
| H75 | -3.5831962478 | 6.0256460980  | 1.6048130659  |

#### 4c, acetonitrile solution

Titled: rpl0\_Pf2\_06HOMe\_pfc\_MeCN

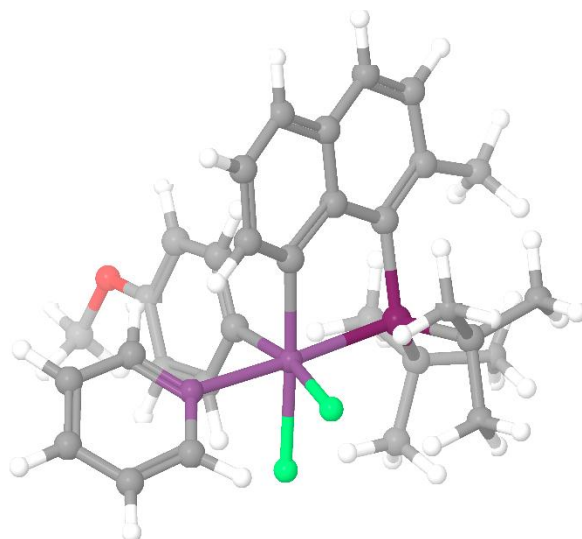

Total Gibbs free energy, Gtot (Htot - T\*S): -1991.836051 hartrees

|     |               |               |               |
|-----|---------------|---------------|---------------|
| Pt1 | -0.1522772157 | -0.1234628855 | 1.4148551663  |
| P2  | -0.3012623667 | -1.0273355747 | -0.7650673628 |
| F3  | -2.0699443695 | -0.5533509492 | 2.2292147247  |

|     |               |               |               |
|-----|---------------|---------------|---------------|
| F4  | 0.3619169198  | -1.9351199141 | 2.4024215767  |
| C5  | 0.2632115971  | -2.8781721611 | -0.7686489999 |
| C6  | 0.4507052645  | -3.4351948431 | -2.1958958290 |
| H7  | 0.7903719411  | -4.4828978474 | -2.0982293136 |
| H8  | 1.2396036359  | -2.8913251562 | -2.7399130985 |
| H9  | -0.4647334216 | -3.4451360705 | -2.8022004538 |
| C10 | 1.6296394291  | -2.9739212878 | -0.0553438441 |
| H11 | 1.5410039756  | -2.6317883657 | 0.9866787580  |
| H12 | 2.4115449325  | -2.4030473754 | -0.5800864549 |
| H13 | 1.9295338977  | -4.0383717241 | -0.0629103062 |
| C14 | -0.7707974647 | -3.6993011920 | 0.0283569411  |
| H15 | -0.4208735904 | -4.7474772307 | 0.0718857623  |
| H16 | -1.7678808402 | -3.7068026069 | -0.4399272382 |
| H17 | -0.8370050514 | -3.3108405564 | 1.0574400543  |
| C18 | -2.0525193231 | -0.7888951585 | -1.5779553519 |
| C19 | -3.1256019362 | -1.0894792107 | -0.5010807562 |
| H20 | -4.0820266085 | -0.6660083386 | -0.8596525757 |
| H21 | -2.8889369006 | -0.6773079475 | 0.4938653192  |
| H22 | -3.2745386063 | -2.1754592588 | -0.3835209744 |
| C23 | -2.3579180544 | -1.7105731494 | -2.7800797967 |
| H24 | -2.3713940968 | -2.7745045505 | -2.4980649730 |
| H25 | -1.6891079844 | -1.5761632420 | -3.6393350060 |
| H26 | -3.3791026139 | -1.4586184967 | -3.1210636077 |
| C27 | -2.1740504909 | 0.6887988392  | -2.0148076058 |
| H28 | -1.3565360373 | 1.0151348816  | -2.6753133875 |
| H29 | -2.2004817429 | 1.3653628343  | -1.1511089864 |
| H30 | -3.1230356260 | 0.8013783255  | -2.5699854086 |
| N31 | 0.0947854643  | 0.7524400389  | 3.3994126017  |
| C32 | -0.2514414303 | -0.0407850068 | 4.4380066348  |
| H33 | -0.5071282452 | -1.0668432827 | 4.1630951409  |
| C34 | -0.2382473775 | 0.4356132284  | 5.7529621980  |
| H35 | -0.5255990836 | -0.2336065284 | 6.5704194442  |
| C36 | 0.1449394175  | 1.7630024147  | 5.9949335111  |
| H37 | 0.1609580834  | 2.1614190592  | 7.0155117141  |
| C38 | 0.5119369365  | 2.5718067855  | 4.9085533727  |
| H39 | 0.8248514763  | 3.6114670183  | 5.0491444758  |
| C40 | 0.4702585021  | 2.0336808195  | 3.6190262343  |
| H41 | 0.7358114687  | 2.6185369190  | 2.7344678541  |
| C42 | -0.8080262293 | 1.7501210648  | 0.8239870866  |
| C43 | -2.0754465809 | 2.1313026156  | 1.3086939693  |
| H44 | -2.6446877394 | 1.3966274316  | 1.8861595643  |
| C45 | -2.6156792049 | 3.4045374290  | 1.0564277306  |
| C46 | -1.8792042555 | 4.3401480819  | 0.3055952709  |
| O47 | -2.3061039103 | 5.6103277776  | -0.0072073341 |
| C48 | -0.6039250486 | 3.9799543213  | -0.1730981104 |
| C49 | -0.0780041534 | 2.7046452332  | 0.0831907838  |
| H50 | 0.9122004477  | 2.4675578674  | -0.3122918302 |
| H51 | -3.6064992454 | 3.6494963442  | 1.4515415542  |
| H52 | -0.0307015256 | 4.7128296718  | -0.7531864874 |
| C53 | 1.7453302054  | 0.2627011043  | 0.8125483577  |

|     |               |               |               |
|-----|---------------|---------------|---------------|
| C54 | 2.7469408184  | 0.5324324782  | 1.7424931300  |
| H55 | 2.5306363591  | 0.4744858382  | 2.8123364953  |
| C56 | 4.0600464116  | 0.8992092564  | 1.3410092339  |
| H57 | 4.8149212901  | 1.1097551931  | 2.1081478677  |
| C58 | 4.3726111299  | 1.0143725291  | -0.0019757318 |
| H59 | 5.3694734185  | 1.3317860652  | -0.3289665113 |
| C60 | 3.3919447370  | 0.7044773775  | -0.9886939137 |
| C61 | 3.6818346299  | 0.8079636497  | -2.3762839691 |
| H62 | 4.6736657518  | 1.1556928876  | -2.6903300150 |
| C63 | 2.7272762800  | 0.4731806607  | -3.3158354232 |
| H64 | 2.9633855034  | 0.5700306607  | -4.3821916269 |
| C65 | 1.4399583389  | -0.0395321853 | -2.9608511474 |
| C66 | 1.1203954323  | -0.1469000333 | -1.5923215425 |
| C67 | 2.0713858502  | 0.2752321599  | -0.5893170556 |
| C68 | 0.5534803059  | -0.4215131732 | -4.1279236808 |
| H69 | 0.2562281412  | -1.4811161191 | -4.1024714291 |
| H70 | 1.0917146231  | -0.2612981731 | -5.0755584492 |
| H71 | -0.3675078158 | 0.1825149813  | -4.1750493527 |
| C72 | -3.6027908062 | 6.0043450020  | 0.4658991676  |
| H73 | -3.7528485443 | 7.0351396312  | 0.1115818024  |
| H74 | -4.3998926767 | 5.3573721861  | 0.0552025209  |
| H75 | -3.6559821703 | 5.9859988200  | 1.5702267525  |

## 5b, gas phase

Total Gibbs free energy, Gtot (Htot - T\*S): -1759.759898 hartrees

|     |               |               |              |
|-----|---------------|---------------|--------------|
| Pt1 | 0.3219128838  | 1.7190485523  | 2.6368652457 |
| P2  | -0.9410316860 | 2.3254215406  | 4.5542990134 |
| C3  | -0.9610133278 | 4.2377220892  | 4.8701409820 |
| C4  | -2.1547347488 | 4.8204578710  | 5.6504574931 |
| H5  | -2.2076258829 | 4.4770600909  | 6.6926825650 |
| H6  | -3.1193117931 | 4.6067944981  | 5.1625418575 |
| H7  | -2.0464411741 | 5.9204137545  | 5.6826419975 |
| C8  | 0.3656350717  | 4.5674941240  | 5.5865124188 |
| H9  | 0.4888754336  | 5.6649943420  | 5.6288147801 |
| H10 | 1.2290918622  | 4.1506278124  | 5.0409271063 |
| H11 | 0.3960866610  | 4.1802977555  | 6.6161870462 |
| C12 | -0.9338079955 | 4.9099061164  | 3.4785764799 |
| H13 | -0.8749407565 | 6.0058253707  | 3.6129142127 |
| H14 | -1.8397998426 | 4.6902443547  | 2.8909148058 |
| H15 | -0.0609105606 | 4.5805115505  | 2.8934011885 |
| C16 | -2.6868774345 | 1.5193146531  | 4.4726963630 |
| C17 | -3.5305989428 | 1.5414381699  | 5.7588208083 |
| H18 | -3.7664933018 | 2.5601052190  | 6.1047401516 |
| H19 | -3.0404653909 | 0.9902714893  | 6.5754738767 |
| H20 | -4.4926782238 | 1.0354346724  | 5.5555313793 |
| C21 | -2.4148595434 | 0.0441466392  | 4.0954525806 |
| H22 | -3.3806258595 | -0.4780263365 | 3.9652547486 |
| H23 | -1.8478869044 | -0.4782476276 | 4.8835175138 |
| H24 | -1.8377720934 | -0.0336643121 | 3.1585632322 |
| C25 | -3.4660285704 | 2.1966626669  | 3.3276337196 |
| H26 | -2.8956305523 | 2.1740129242  | 2.3864983315 |
| H27 | -3.7247003180 | 3.2441494429  | 3.5559497890 |
| H28 | -4.4138271322 | 1.6515266071  | 3.1660933732 |
| C29 | 1.3828154540  | 0.6794583090  | 3.9621206559 |
| C30 | 2.4547343326  | -0.0861321350 | 3.4633945873 |
| C31 | 3.2397207013  | -0.8842172484 | 4.3394731989 |
| H32 | 4.0664936780  | -1.4820456085 | 3.9419140574 |
| C33 | 2.9713423368  | -0.9111685423 | 5.6963889254 |
| H34 | 3.5783422762  | -1.5197712464 | 6.3752872954 |
| C35 | 1.9077591262  | -0.1381344073 | 6.2397052631 |
| C36 | 1.6311629302  | -0.1202652285 | 7.6311519304 |
| H37 | 2.2438642610  | -0.7316437951 | 8.3028501559 |
| C38 | 0.6159399156  | 0.6669152174  | 8.1345264474 |
| H39 | 0.4265550475  | 0.6857450773  | 9.2138751899 |
| C40 | -0.2089272751 | 1.4764815971  | 7.2962491028 |
| C41 | 0.0075729295  | 1.4569741487  | 5.9089366637 |
| C42 | 1.0884424180  | 0.6672915607  | 5.3620569243 |
| C43 | -1.2142008905 | 2.3345828024  | 8.0292476715 |
| H44 | -0.7059547281 | 3.1714137698  | 8.5436644452 |
| H45 | -1.7287753537 | 1.7514045975  | 8.8123430831 |
| H46 | -1.9798732908 | 2.7600744768  | 7.3751805893 |
| C47 | 2.6633510952  | 0.0291835540  | 2.0117074058 |

|     |               |               |               |
|-----|---------------|---------------|---------------|
| C48 | 3.6937787879  | -0.6361465920 | 1.3217327670  |
| H49 | 4.4049538894  | -1.2940643132 | 1.8268160615  |
| C50 | 3.8111377822  | -0.4414637749 | -0.0544739344 |
| C51 | 2.9406498153  | 0.3911430756  | -0.7546667660 |
| H52 | 3.0443656660  | 0.5439236454  | -1.8306905578 |
| C53 | 1.9265611465  | 1.0328881538  | -0.0251599073 |
| C54 | 1.7311425556  | 0.8925926743  | 1.3509823228  |
| F55 | 4.8025508862  | -1.0760079926 | -0.7332153895 |
| F56 | 1.1127037091  | 1.8452587579  | -0.7731135423 |
| N57 | -0.7501676351 | 2.6764001437  | 1.1060314026  |
| C58 | -1.2495944717 | 3.1029111126  | 0.1365117710  |
| C59 | -1.7771920601 | 3.5810773880  | -1.1299978181 |
| H60 | -1.7951100303 | 4.6826070315  | -1.1555693889 |
| H61 | -2.8001316485 | 3.2057479020  | -1.2947908821 |
| H62 | -1.1264874474 | 3.2149973024  | -1.9417996849 |

### 5b, acetonitrile solution

Title: nprth\_7\_CSHF92\_P1\_NCM6\_MeCN

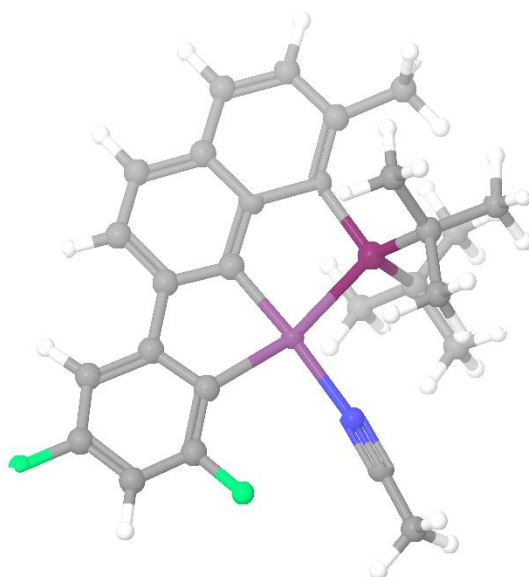

Total Gibbs free energy, Gtot (Htot - T\*S): -1759.780807 hartrees

|     |               |              |              |
|-----|---------------|--------------|--------------|
| Pt1 | 0.3511995849  | 1.7214251235 | 2.6288884399 |
| P2  | -0.9427837425 | 2.3338350880 | 4.5445377775 |
| C3  | -1.0187196850 | 4.2479480949 | 4.8539952549 |
| C4  | -2.2426835853 | 4.8026649330 | 5.6102584047 |
| H5  | -2.3046507881 | 4.4744250173 | 6.6571191751 |
| H6  | -3.1920432775 | 4.5549838305 | 5.1090429377 |
| H7  | -2.1639749893 | 5.9057959858 | 5.6267859278 |
| C8  | 0.2863435378  | 4.6253664062 | 5.5871364717 |
| H9  | 0.3777278847  | 5.7262551751 | 5.6192869339 |
| H10 | 1.1704245813  | 4.2294598404 | 5.0584536467 |
| H11 | 0.3132749259  | 4.2519171560 | 6.6218483189 |
| C12 | -0.9972134741 | 4.9087681787 | 3.4570435270 |
| H13 | -0.9552511895 | 6.0065416098 | 3.5789176295 |
| H14 | -1.8963772488 | 4.6684190221 | 2.8679387593 |

|     |               |               |               |
|-----|---------------|---------------|---------------|
| H15 | -0.1194669568 | 4.5840546422  | 2.8771512523  |
| C16 | -2.6671149308 | 1.4825861389  | 4.4567530709  |
| C17 | -3.5099447167 | 1.4959073700  | 5.7449305157  |
| H18 | -3.7681491109 | 2.5114513059  | 6.0835587736  |
| H19 | -3.0090301527 | 0.9599994584  | 6.5660542394  |
| H20 | -4.4600771624 | 0.9674173456  | 5.5407839909  |
| C21 | -2.3647517352 | 0.0113552052  | 4.0894351915  |
| H22 | -3.3195919893 | -0.5284134261 | 3.9530538693  |
| H23 | -1.7948477705 | -0.4981968095 | 4.8840680369  |
| H24 | -1.7809518209 | -0.0548557637 | 3.1555013067  |
| C25 | -3.4589663305 | 2.1366354867  | 3.3051344126  |
| H26 | -2.8820660668 | 2.1341682002  | 2.3671419346  |
| H27 | -3.7578196951 | 3.1739294265  | 3.5306579838  |
| H28 | -4.3855418899 | 1.5577362827  | 3.1373526800  |
| C29 | 1.3887421319  | 0.6715520441  | 3.9659129878  |
| C30 | 2.4448394345  | -0.1277048973 | 3.4765809677  |
| C31 | 3.2193680004  | -0.9321611616 | 4.3600493463  |
| H32 | 4.0333243659  | -1.5542203877 | 3.9697281895  |
| C33 | 2.9572371669  | -0.9300521928 | 5.7199766728  |
| H34 | 3.5560654683  | -1.5390499948 | 6.4072745498  |
| C35 | 1.9081112922  | -0.1267845432 | 6.2542393709  |
| C36 | 1.6433204435  | -0.0870328501 | 7.6508720075  |
| H37 | 2.2565846916  | -0.6935465891 | 8.3291521823  |
| C38 | 0.6342651498  | 0.7149425849  | 8.1457540089  |
| H39 | 0.4478311722  | 0.7500650733  | 9.2264230473  |
| C40 | -0.1958997171 | 1.5140565708  | 7.2974873246  |
| C41 | 0.0196504448  | 1.4822313807  | 5.9087032501  |
| C42 | 1.0956095704  | 0.6791378633  | 5.3696686937  |
| C43 | -1.2129513057 | 2.3625488585  | 8.0255334644  |
| H44 | -0.7112734906 | 3.1850390891  | 8.5699932088  |
| H45 | -1.7454486132 | 1.7635153618  | 8.7851004434  |
| H46 | -1.9631354923 | 2.8035580646  | 7.3638940436  |
| C47 | 2.6575411325  | -0.0349120660 | 2.0219203199  |
| C48 | 3.6636248616  | -0.7458696370 | 1.3363714144  |
| H49 | 4.3496623832  | -1.4295111870 | 1.8461687599  |
| C50 | 3.7854926464  | -0.5648445584 | -0.0426470319 |
| C51 | 2.9509080727  | 0.2941260560  | -0.7564959339 |
| H52 | 3.0614990240  | 0.4336917582  | -1.8360076030 |
| C53 | 1.9608815309  | 0.9780696029  | -0.0281424441 |
| C54 | 1.7555094037  | 0.8569013255  | 1.3510757090  |
| F55 | 4.7547602481  | -1.2455848101 | -0.7156663661 |
| F56 | 1.1741327797  | 1.8139567995  | -0.7738163042 |
| N57 | -0.7249570625 | 2.7270251341  | 1.0784675442  |
| C58 | -1.2451641171 | 3.2112928385  | 0.1469605617  |
| C59 | -1.8531822793 | 3.8038539097  | -1.0325789201 |
| H60 | -1.7077381613 | 4.8984412007  | -1.0256984076 |
| H61 | -2.9340020897 | 3.5810814783  | -1.0590054983 |
| H62 | -1.3814441291 | 3.3889618206  | -1.9411903601 |

## 8, gas phase

Total Gibbs free energy, Gtot (Htot - T\*S): -1827.823794 hartrees

|     |               |               |               |
|-----|---------------|---------------|---------------|
| Pt1 | 7.9702495933  | 9.1471781748  | 4.1634972855  |
| P2  | 7.9883568413  | 8.2178730776  | 2.0904172711  |
| F3  | 6.2401948122  | 8.9527109267  | 5.2009624912  |
| F4  | 8.5491071806  | 7.5148259758  | 5.2567333878  |
| C5  | 8.6275350950  | 6.4018684336  | 2.2387649506  |
| C6  | 8.8581565815  | 5.8095429093  | 0.8296788911  |
| H7  | 9.2462495538  | 4.7851761288  | 0.9693523879  |
| H8  | 9.6266052302  | 6.3725940126  | 0.2765196596  |
| H9  | 7.9509923419  | 5.7321881597  | 0.2156617022  |
| C10 | 9.9847079581  | 6.4020634928  | 2.9745769583  |
| H11 | 9.8640693748  | 6.7919100725  | 3.9973627594  |
| H12 | 10.7584542294 | 6.9657136754  | 2.4313919761  |
| H13 | 10.3180048604 | 5.3500905353  | 3.0327102983  |
| C14 | 7.6193224032  | 5.5708720003  | 3.0553869842  |
| H15 | 8.0254690879  | 4.5485694917  | 3.1565883663  |
| H16 | 6.6347237293  | 5.4834961260  | 2.5703323910  |
| H17 | 7.5139604323  | 5.9994853165  | 4.0654145565  |
| C18 | 6.2079901168  | 8.3507463020  | 1.3525069453  |
| C19 | 5.1792770830  | 8.0462304254  | 2.4707095641  |
| H20 | 4.1849800013  | 8.3264604962  | 2.0794222633  |
| H21 | 5.3566317603  | 8.5927019702  | 3.4109945119  |
| H22 | 5.1466047947  | 6.9735743316  | 2.7149910139  |
| C23 | 5.9498951751  | 7.3530348894  | 0.2006458407  |
| H24 | 5.9951961841  | 6.3067703150  | 0.5373440346  |
| H25 | 6.6172521085  | 7.4826129209  | -0.6617028867 |
| H26 | 4.9191652326  | 7.5311539269  | -0.1531492164 |
| C27 | 6.0005400110  | 9.7961131707  | 0.8537434387  |
| H28 | 6.7780860209  | 10.1328111670 | 0.1513687255  |
| H29 | 5.9664677572  | 10.5087412094 | 1.6880671494  |
| H30 | 5.0295909766  | 9.8368707351  | 0.3298800759  |
| C42 | 7.3506948292  | 11.0357488590 | 3.5974282829  |
| C43 | 6.1494540481  | 11.4855257089 | 4.1893707602  |
| H44 | 5.5698328685  | 10.8131154335 | 4.8257508294  |
| C45 | 5.7250262226  | 12.7981641805 | 3.9680419280  |
| C46 | 6.4258488558  | 13.7028647139 | 3.1659672767  |
| H47 | 6.0750353117  | 14.7229753948 | 3.0041263360  |
| C48 | 7.6068667356  | 13.2277173406 | 2.5919546639  |
| C49 | 8.0800301389  | 11.9265378269 | 2.7817808215  |
| H50 | 9.0106410733  | 11.6492475517 | 2.2879116823  |
| F51 | 4.5731986995  | 13.2161768650 | 4.5472487105  |
| F52 | 8.3253355862  | 14.0689054659 | 1.8056845495  |
| C53 | 9.8713257548  | 9.5703658336  | 3.6262897172  |
| C54 | 10.7774848903 | 9.9355709645  | 4.6116415143  |
| H55 | 10.4907024581 | 9.8830112075  | 5.6669529161  |
| C56 | 12.0714302536 | 10.4056542892 | 4.2593031656  |
| H57 | 12.7620326615 | 10.7091082271 | 5.0524762552  |
| C58 | 12.4556263680 | 10.4979952470 | 2.9318234243  |



|     |               |               |               |
|-----|---------------|---------------|---------------|
| H59 | 13.4429397767 | 10.8839699408 | 2.6594914071  |
| C60 | 11.5665818486 | 10.0899660352 | 1.8977236557  |
| C61 | 11.8874304337 | 10.1723665905 | 0.5164902396  |
| H62 | 12.8614765863 | 10.5747952647 | 0.2184881039  |
| C63 | 10.9808310404 | 9.7634554567  | -0.4445775323 |
| H64 | 11.2448278000 | 9.8509036532  | -1.5036836355 |
| C65 | 9.7072728251  | 9.2039029367  | -0.1212835014 |
| C66 | 9.3671136082  | 9.1130869580  | 1.2378978920  |
| C67 | 10.2674365323 | 9.5884329680  | 2.2519556697  |
| C68 | 8.8444928922  | 8.7536876259  | -1.2780989690 |
| H69 | 8.6415032132  | 7.6708598883  | -1.2499477092 |
| H70 | 9.3485582778  | 8.9638071769  | -2.2334881087 |
| H71 | 7.8732297610  | 9.2730040116  | -1.3011043151 |

## 8, acetonitrile solution

Title: rpt0\_Pf2\_OHf\_a\_MeCN

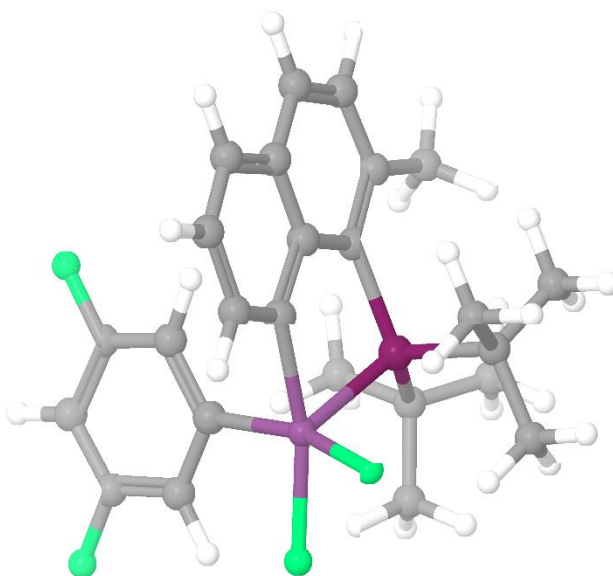

Total Gibbs free energy, Gtot (Htot - T\*S): -1827.851932 hartrees

|     |               |              |              |
|-----|---------------|--------------|--------------|
| Pt1 | 7.9898519763  | 9.1370483250 | 4.1808069757 |
| P2  | 7.9823388094  | 8.2158323496 | 2.0655583735 |
| F3  | 6.2860494975  | 8.9635994742 | 5.3297262961 |
| F4  | 8.5914349703  | 7.5260777711 | 5.3378610164 |
| C5  | 8.6139763702  | 6.3938387832 | 2.2153188383 |
| C6  | 8.8492513482  | 5.8050087656 | 0.8031354352 |
| H7  | 9.2238281864  | 4.7752416695 | 0.9480116938 |
| H8  | 9.6305331510  | 6.3569536587 | 0.2564055349 |
| H9  | 7.9463790834  | 5.7366499604 | 0.1817727836 |
| C10 | 9.9669062550  | 6.3830365404 | 2.9585789800 |
| H11 | 9.8496178193  | 6.7660650064 | 3.9834510093 |
| H12 | 10.7442247944 | 6.9501774970 | 2.4237749908 |
| H13 | 10.2959732456 | 5.3290298196 | 3.0076252437 |
| C14 | 7.5957030266  | 5.5599868160 | 3.0173058102 |
| H15 | 7.9971017855  | 4.5342093635 | 3.1080392981 |
| H16 | 6.6125029966  | 5.4829658476 | 2.5272244068 |

|     |               |               |               |
|-----|---------------|---------------|---------------|
| H17 | 7.4844615822  | 5.9744271842  | 4.0322002775  |
| C18 | 6.1981760181  | 8.3661088919  | 1.3300049450  |
| C19 | 5.1742904344  | 8.0853678570  | 2.4596816523  |
| H20 | 4.1791213694  | 8.3645406803  | 2.0681493014  |
| H21 | 5.3584188653  | 8.6543361781  | 3.3841118346  |
| H22 | 5.1368180051  | 7.0167137359  | 2.7236097017  |
| C23 | 5.9270141264  | 7.3553785887  | 0.1901363318  |
| H24 | 5.9607792866  | 6.3104095798  | 0.5336995082  |
| H25 | 6.5903668832  | 7.4727145471  | -0.6776332846 |
| H26 | 4.8964658371  | 7.5454768414  | -0.1612335386 |
| C27 | 6.0024419320  | 9.8056100557  | 0.8075228154  |
| H28 | 6.7690710754  | 10.1172965871 | 0.0820199705  |
| H29 | 5.9867188656  | 10.5367256345 | 1.6259670470  |
| H30 | 5.0236472559  | 9.8445858880  | 0.2969086994  |
| C42 | 7.3545521458  | 11.0111460905 | 3.5969974855  |
| C43 | 6.1417741792  | 11.4562018141 | 4.1708032238  |
| H44 | 5.5568662280  | 10.7856621066 | 4.8044843258  |
| C45 | 5.7023469792  | 12.7608531933 | 3.9271792742  |
| C46 | 6.3971440406  | 13.6724207473 | 3.1271622830  |
| H47 | 6.0328946082  | 14.6876667028 | 2.9470949018  |
| C48 | 7.5918267477  | 13.2007254016 | 2.5769013752  |
| C49 | 8.0812786506  | 11.9075601205 | 2.7845715810  |
| H50 | 9.0182553759  | 11.6362939669 | 2.2995353741  |
| F51 | 4.5328266159  | 13.1637405336 | 4.4902820642  |
| F52 | 8.3144554405  | 14.0423466578 | 1.7921037092  |
| C53 | 9.8815867342  | 9.5664137597  | 3.6125879521  |
| C54 | 10.7834605384 | 9.9485968952  | 4.5970935214  |
| H55 | 10.4974808524 | 9.9106959852  | 5.6544843865  |
| C56 | 12.0754245423 | 10.4302914078 | 4.2423882843  |
| H57 | 12.7630608525 | 10.7474493092 | 5.0351371497  |
| C58 | 12.4549108570 | 10.5151520819 | 2.9112836163  |
| H59 | 13.4403282028 | 10.9060970717 | 2.6328532763  |
| C60 | 11.5640836792 | 10.0951609233 | 1.8800013450  |
| C61 | 11.8848235060 | 10.1808564122 | 0.4964681408  |
| H62 | 12.8592725992 | 10.5865532176 | 0.1967298315  |
| C63 | 10.9771247225 | 9.7699371811  | -0.4645295985 |
| H64 | 11.2428436337 | 9.8570617801  | -1.5248623764 |
| C65 | 9.7006288162  | 9.2090464235  | -0.1425064098 |
| C66 | 9.3637341882  | 9.1132700798  | 1.2205582294  |
| C67 | 10.2677843615 | 9.5836785133  | 2.2352938130  |
| C68 | 8.8437535397  | 8.7646872343  | -1.3073273042 |
| H69 | 8.5993007768  | 7.6909469600  | -1.2643232126 |
| H70 | 9.3767572568  | 8.9360755720  | -2.2555678182 |
| H71 | 7.8937589964  | 9.3215967384  | -1.3654842747 |

## 9, gas phase

Total Gibbs free energy, Gtot (Htot - T\*S): -1827.833866 hartrees

|     |               |               |               |
|-----|---------------|---------------|---------------|
| Pt1 | 8.2790136371  | 9.0836984783  | 4.0860203668  |
| P2  | 8.0303022825  | 8.2831663197  | 1.9340511360  |
| F3  | 8.7843518970  | 9.4919259641  | 5.9826011785  |
| F4  | 6.6347179269  | 8.0620104047  | 4.8453992601  |
| C5  | 8.4028215254  | 6.4199708280  | 2.2404250407  |
| C6  | 8.7873174454  | 5.6546681117  | 0.9637678861  |
| H7  | 9.0394193951  | 4.6160376868  | 1.2444815771  |
| H8  | 9.6716995307  | 6.0906287059  | 0.4724593406  |
| H9  | 7.9618272909  | 5.6030801705  | 0.2374555831  |
| C10 | 9.6115780103  | 6.4155770029  | 3.2092404070  |
| H11 | 9.3536924216  | 6.8321093329  | 4.2051294350  |
| H12 | 10.4802503326 | 6.9674858913  | 2.8170479883  |
| H13 | 9.9173554651  | 5.3692051778  | 3.3902503901  |
| C14 | 7.2034759819  | 5.7607751137  | 2.9539549413  |
| H15 | 7.5190996067  | 4.7612499513  | 3.3037375649  |
| H16 | 6.3445378355  | 5.6113884023  | 2.2818117515  |
| H17 | 6.8774791216  | 6.3579931318  | 3.8248852565  |
| C18 | 6.3426741238  | 8.6155774030  | 1.0640444422  |
| C19 | 5.2912479733  | 8.7950643356  | 2.1926472233  |
| H20 | 4.2863894070  | 8.6196721592  | 1.7706746636  |
| H21 | 5.3210739452  | 9.8217797511  | 2.5840076341  |
| H22 | 5.4460454638  | 8.1374390788  | 3.0630383060  |
| C23 | 5.8652574799  | 7.4844141730  | 0.1280649662  |
| H24 | 5.6841522229  | 6.5419723053  | 0.6644475829  |
| H25 | 6.5397683544  | 7.2844188735  | -0.7168607457 |
| H26 | 4.9002270953  | 7.8012036291  | -0.3059118499 |
| C27 | 6.4632165076  | 9.9327338436  | 0.2696474956  |
| H28 | 7.1391678545  | 9.8520271668  | -0.5947409985 |
| H29 | 6.8070245355  | 10.7622274689 | 0.9070958042  |
| H30 | 5.4596986219  | 10.1987387663 | -0.1077224467 |
| C42 | 7.3288745887  | 10.8512290466 | 3.9536118336  |
| C43 | 6.2478812555  | 10.9620409257 | 4.8398487945  |
| H44 | 5.9376765964  | 10.1192378909 | 5.4593217770  |
| C45 | 5.5567126220  | 12.1786939331 | 4.8592083687  |
| C46 | 5.8944758778  | 13.2643908735 | 4.0452181768  |
| H47 | 5.3369830336  | 14.2011219355 | 4.0812325177  |
| C48 | 6.9831343308  | 13.0923504970 | 3.1892060446  |
| C49 | 7.7249246711  | 11.9047524226 | 3.1203347941  |
| H50 | 8.5799712573  | 11.8439342011 | 2.4478017109  |
| F51 | 4.5033385270  | 12.3074674951 | 5.6963773132  |
| F52 | 7.3469065818  | 14.1198701051 | 2.3861226254  |
| C53 | 10.0007842673 | 9.8789644240  | 3.4136651667  |
| C54 | 10.8430968877 | 10.5487735747 | 4.2937173951  |
| H55 | 10.5364264750 | 10.6183045938 | 5.3419260315  |
| C56 | 12.0580736012 | 11.1181120281 | 3.8399167588  |
| H57 | 12.7037546315 | 11.6434204459 | 4.5512578420  |
| C58 | 12.4210547903 | 11.0230614788 | 2.5066918072  |

|     |               |               |               |
|-----|---------------|---------------|---------------|
| H59 | 13.3514130178 | 11.4720107248 | 2.1441399369  |
| C60 | 11.5882755642 | 10.3377276344 | 1.5784923588  |
| C61 | 11.9347602469 | 10.2184447263 | 0.2055499612  |
| H62 | 12.8665376014 | 10.6740144133 | -0.1467296967 |
| C63 | 11.1163556478 | 9.5353789497  | -0.6698009999 |
| H64 | 11.4009226466 | 9.4473578854  | -1.7239730935 |
| C65 | 9.8987574926  | 8.9190286804  | -0.2520585021 |
| C66 | 9.5141995802  | 9.0296676668  | 1.0927933559  |
| C67 | 10.3522932584 | 9.7452297366  | 2.0294005457  |
| C68 | 9.1276861879  | 8.1976235738  | -1.3310115655 |
| H69 | 8.3153422493  | 7.5794529585  | -0.9360745985 |
| H70 | 9.7981693904  | 7.5374608256  | -1.9071878389 |
| H71 | 8.6920549525  | 8.9126011241  | -2.0520989688 |

## 9, acetonitrile solution

Title: nqth\_Pf2\_O5H4F\_b\_MeCN

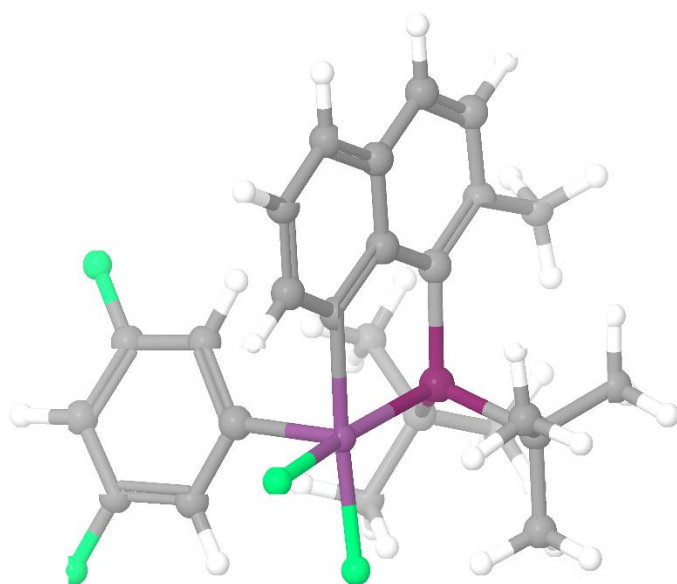

Total Gibbs free energy, Gtot (Htot - T\*S): -1827.860665 hartrees

|     |               |              |              |
|-----|---------------|--------------|--------------|
| Pt1 | 8.2592339309  | 9.0705232924 | 4.0925912093 |
| P2  | 8.0116201640  | 8.2833922886 | 1.9182597926 |
| F3  | 8.7749568115  | 9.4542320288 | 6.0361851819 |
| F4  | 6.6185908558  | 8.0496146397 | 4.9220355284 |
| C5  | 8.4068200386  | 6.4262547397 | 2.2390083369 |
| C6  | 8.8126433063  | 5.6667221677 | 0.9643591775 |
| H7  | 9.0748166944  | 4.6320577209 | 1.2532552745 |
| H8  | 9.6978133522  | 6.1108605558 | 0.4811934222 |
| H9  | 7.9938120462  | 5.6036152722 | 0.2309318356 |
| C10 | 9.6048687783  | 6.4377564890 | 3.2228850227 |
| H11 | 9.3361399372  | 6.8627188582 | 4.2165191119 |
| H12 | 10.4772906107 | 6.9869157638 | 2.8344921526 |
| H13 | 9.9111116389  | 5.3942186901 | 3.4243925369 |
| C14 | 7.2053941055  | 5.7513541101 | 2.9347044789 |
| H15 | 7.5298656532  | 4.7533174835 | 3.2814846298 |

|     |               |               |               |
|-----|---------------|---------------|---------------|
| H16 | 6.3556338198  | 5.5981829772  | 2.2518043001  |
| H17 | 6.8679466226  | 6.3386902353  | 3.8063111984  |
| C18 | 6.3171340276  | 8.6122101259  | 1.0487421271  |
| C19 | 5.2652540249  | 8.7977512363  | 2.1727126197  |
| H20 | 4.2601345764  | 8.6845607916  | 1.7296816881  |
| H21 | 5.3351634849  | 9.8051809105  | 2.6066295645  |
| H22 | 5.3775108269  | 8.0883228556  | 3.0069217309  |
| C23 | 5.8441779361  | 7.4672961696  | 0.1241136525  |
| H24 | 5.6403627165  | 6.5357994627  | 0.6724425444  |
| H25 | 6.5287123635  | 7.2437793226  | -0.7067562099 |
| H26 | 4.8903773587  | 7.7914962242  | -0.3308369334 |
| C27 | 6.4333277685  | 9.9229126921  | 0.2411450444  |
| H28 | 7.1021490366  | 9.8325284928  | -0.6277409491 |
| H29 | 6.7802874087  | 10.7605273786 | 0.8667003643  |
| H30 | 5.4264737246  | 10.1824559471 | -0.1339515560 |
| C42 | 7.3225417400  | 10.8474968315 | 3.9593416757  |
| C43 | 6.2373192406  | 10.9853072915 | 4.8407598947  |
| H44 | 5.8980656302  | 10.1539637895 | 5.4609206809  |
| C45 | 5.5687122652  | 12.2159856674 | 4.8520254863  |
| C46 | 5.9221997907  | 13.2964710442 | 4.0376219596  |
| H47 | 5.3804185095  | 14.2460271816 | 4.0688506434  |
| C48 | 7.0081955689  | 13.0942806486 | 3.1835462177  |
| C49 | 7.7301518689  | 11.8938374523 | 3.1193111817  |
| H50 | 8.5781320082  | 11.8156682160 | 2.4395345508  |
| F51 | 4.5144059839  | 12.3612997829 | 5.6905405292  |
| F52 | 7.3951187828  | 14.1103629201 | 2.3745400293  |
| C53 | 9.9832280243  | 9.8702297761  | 3.4098019122  |
| C54 | 10.8285813541 | 10.5371873899 | 4.2911620048  |
| H55 | 10.5339415632 | 10.6063184461 | 5.3428498612  |
| C56 | 12.0442834754 | 11.1132979971 | 3.8397197500  |
| H57 | 12.6912468294 | 11.6345173619 | 4.5549898857  |
| C58 | 12.4034254397 | 11.0275018133 | 2.5033007317  |
| H59 | 13.3342866267 | 11.4788091489 | 2.1398475746  |
| C60 | 11.5655359772 | 10.3472749007 | 1.5729233949  |
| C61 | 11.9121641642 | 10.2389352302 | 0.1963105668  |
| H62 | 12.8453584040 | 10.6960099032 | -0.1552987010 |
| C63 | 11.0903397876 | 9.5616314936  | -0.6820463019 |
| H64 | 11.3739917990 | 9.4787604374  | -1.7383126934 |
| C65 | 9.8702427540  | 8.9414898731  | -0.2671433914 |
| C66 | 9.4888699506  | 9.0442414066  | 1.0818227628  |
| C67 | 10.3297075717 | 9.7501396466  | 2.0223510263  |
| C68 | 9.1076550479  | 8.2237975399  | -1.3545706143 |
| H69 | 8.2852533051  | 7.6092753950  | -0.9744634858 |
| H70 | 9.7852820519  | 7.5605551665  | -1.9202679598 |
| H71 | 8.6905153529  | 8.9441881230  | -2.0826471989 |

## 10, gas phase

Total Gibbs free energy, Gtot (Htot - T\*S): -1827.811182 hartrees

|     |               |               |               |
|-----|---------------|---------------|---------------|
| Pt1 | 0.1756009483  | -0.7895306430 | 1.8882434429  |
| P2  | 0.2134616470  | -0.5925698111 | -0.3854851395 |
| F3  | 0.4779625236  | -0.9559169359 | 3.8957900117  |
| F4  | 0.5005179232  | -2.7467508770 | 1.8134577746  |
| C5  | 1.9036235171  | -1.3099050018 | -0.9966348043 |
| C6  | 2.2325239781  | -0.9484556146 | -2.4569385171 |
| H7  | 3.2147391365  | -1.3906945348 | -2.7031618734 |
| H8  | 2.3188704949  | 0.1394127482  | -2.6038235926 |
| H9  | 1.5061562650  | -1.3520804378 | -3.1774798991 |
| C10 | 2.9894226976  | -0.6928214437 | -0.0853414053 |
| H11 | 2.8312596746  | -0.9530058923 | 0.9730507837  |
| H12 | 3.0349877389  | 0.4046582208  | -0.1688380701 |
| H13 | 3.9686830403  | -1.0967804838 | -0.3984757449 |
| C14 | 1.9162170401  | -2.8410785545 | -0.7974806449 |
| H15 | 2.9436222675  | -3.2017655503 | -0.9850058969 |
| H16 | 1.2550414532  | -3.3676868931 | -1.5031744874 |
| H17 | 1.6219689208  | -3.1055589023 | 0.2302085727  |
| C18 | -1.3175743526 | -1.4078464005 | -1.2455291684 |
| C19 | -1.7683395987 | -2.5179056553 | -0.2618508195 |
| H20 | -2.5506540977 | -3.1259365485 | -0.7500508946 |
| H21 | -2.1908128855 | -2.0762395681 | 0.6544953680  |
| H22 | -0.9471520755 | -3.1748482183 | 0.0619263639  |
| C23 | -1.0498432452 | -2.0466916081 | -2.6234782748 |
| H24 | -0.2862508142 | -2.8361669961 | -2.5854090587 |
| H25 | -0.7639336523 | -1.3228397941 | -3.4021545180 |
| H26 | -1.9899128384 | -2.5179302683 | -2.9615086428 |
| C27 | -2.4575263838 | -0.3792120148 | -1.3754142004 |
| H28 | -2.2182301344 | 0.4480113493  | -2.0616539778 |
| H29 | -2.7386057864 | 0.0436530110  | -0.4002087565 |
| H30 | -3.3459899103 | -0.8985954435 | -1.7776510248 |
| C31 | -1.0789428642 | 1.0241231401  | 2.2857008595  |
| C32 | -1.5469982512 | 0.8302333463  | 3.6184372415  |
| H33 | -0.9115617803 | 0.3091988562  | 4.3401762193  |
| C34 | -2.8469025273 | 1.1898173605  | 3.9514659341  |
| C35 | -3.7524247358 | 1.7580168087  | 3.0456448007  |
| H36 | -4.7656467073 | 2.0361563432  | 3.3370660662  |
| C37 | -3.2730519928 | 1.9433176048  | 1.7487045150  |
| C38 | -1.9815955971 | 1.6026021456  | 1.3512975809  |
| H39 | -1.6754823676 | 1.8617966584  | 0.3394288670  |
| F40 | -3.2716158394 | 0.9692912276  | 5.2166664218  |
| F41 | -4.0957556485 | 2.4949292275  | 0.8220895486  |
| C42 | 0.5463912231  | 1.2779575190  | 1.9453503975  |
| C43 | 1.2877226201  | 1.7502624405  | 3.0614841344  |
| H44 | 1.1680747754  | 1.2060664754  | 4.0021666390  |
| C45 | 2.0862742450  | 2.8989402189  | 2.9778918444  |
| H46 | 2.6188481022  | 3.2489032888  | 3.8672368304  |
| C47 | 2.1466557985  | 3.6253111269  | 1.7921886636  |

|     |               |              |               |
|-----|---------------|--------------|---------------|
| H48 | 2.6876788251  | 4.5758435122 | 1.7424247392  |
| C49 | 1.5337509735  | 3.1256640196 | 0.6079941391  |
| C50 | 1.6294031301  | 3.8204450562 | -0.6295042637 |
| H51 | 2.1417070019  | 4.7881485642 | -0.6538327851 |
| C52 | 1.0872748170  | 3.2849742222 | -1.7799128334 |
| H53 | 1.1392252590  | 3.8444328053 | -2.7199894374 |
| C54 | 0.5200430254  | 1.9770412438 | -1.8032167883 |
| C55 | 0.4391770959  | 1.2503251852 | -0.5996284156 |
| C56 | 0.8345838636  | 1.8718639465 | 0.6373570094  |
| C57 | 0.0283738647  | 1.4853152943 | -3.1426130197 |
| H58 | -0.1455577804 | 0.4044210970 | -3.1633886269 |
| H59 | 0.7445328576  | 1.7301237838 | -3.9444963259 |
| H60 | -0.9237744954 | 1.9831403375 | -3.4026398906 |

## 10, acetonitrile solution

TiSe: opt63 8 CBHF2 PF2 c c sigma complex MeCN

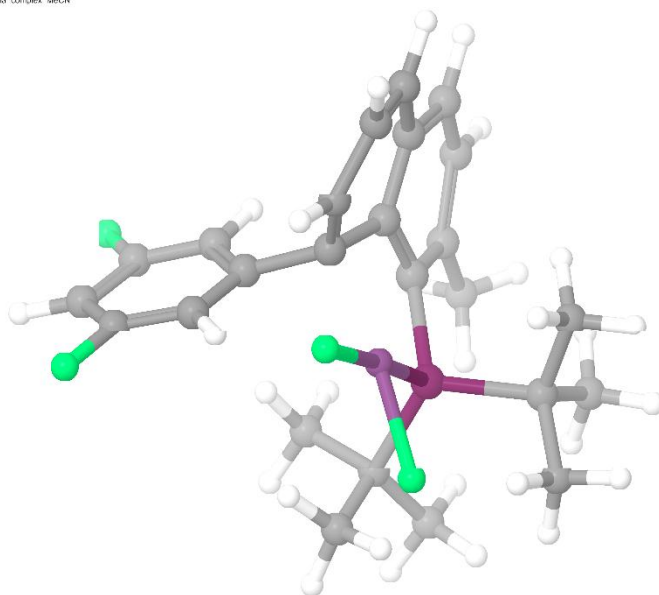

Total Gibbs free energy, Gtot (Htot - T\*S): -1827.846614 hartrees

|     |              |               |               |
|-----|--------------|---------------|---------------|
| Pt1 | 0.5307518907 | -0.7986810439 | 1.9228925472  |
| P2  | 0.2742309904 | -0.6285541036 | -0.3442991333 |
| F3  | 0.5953455007 | -0.9533234183 | 3.9971161138  |
| F4  | 0.6733319340 | -2.8418763086 | 1.9592317670  |
| C5  | 1.8971089341 | -1.2783917622 | -1.1642333054 |
| C6  | 2.0438283593 | -1.0435122100 | -2.6791870539 |
| H7  | 2.9991031299 | -1.5016040314 | -2.9970058132 |
| H8  | 2.1020441555 | 0.0267328633  | -2.9294877073 |
| H9  | 1.2454644247 | -1.5101611530 | -3.2748958936 |
| C10 | 3.0441538090 | -0.5346514654 | -0.4420817840 |
| H11 | 2.9821114109 | -0.6775769946 | 0.6497859946  |
| H12 | 3.0314337325 | 0.5479675719  | -0.6484695885 |
| H13 | 4.0080214066 | -0.9367802607 | -0.8022521491 |
| C14 | 1.9856064865 | -2.7890816998 | -0.8419957926 |
| H15 | 3.0167793221 | -3.1275242754 | -1.0521862240 |
| H16 | 1.3109610788 | -3.3872175724 | -1.4759563700 |

|     |               |               |               |
|-----|---------------|---------------|---------------|
| H17 | 1.7450335336  | -2.9974673876 | 0.2146984339  |
| C18 | -1.3481097346 | -1.4650139693 | -0.9844775040 |
| C19 | -1.7469295797 | -2.5115195309 | 0.0824916058  |
| H20 | -2.6015126216 | -3.0998791762 | -0.2976359274 |
| H21 | -2.0529495778 | -2.0083674520 | 1.0151541273  |
| H22 | -0.9227188588 | -3.1905662411 | 0.3483686681  |
| C23 | -1.2232543932 | -2.1557025873 | -2.3573103016 |
| H24 | -0.4943509619 | -2.9802269989 | -2.3564858627 |
| H25 | -0.9685130637 | -1.4615567817 | -3.1741213329 |
| H26 | -2.2089174072 | -2.5910146333 | -2.6047882721 |
| C27 | -2.4466932493 | -0.3850890689 | -1.0548339332 |
| H28 | -2.2609389480 | 0.3589100493  | -1.8456893857 |
| H29 | -2.5603685748 | 0.1470191023  | -0.0978608377 |
| H30 | -3.4082943029 | -0.8810907189 | -1.2820780557 |
| C31 | -1.3951162447 | 1.4137003845  | 2.1846576845  |
| C32 | -1.9874524752 | 0.7182074821  | 3.2616762068  |
| H33 | -1.3865857621 | 0.0332149119  | 3.8719524649  |
| C34 | -3.3432589856 | 0.9145996167  | 3.5255019277  |
| C35 | -4.1633023949 | 1.7643537275  | 2.7720884096  |
| H36 | -5.2249944361 | 1.8972011505  | 2.9997072194  |
| C37 | -3.5395050016 | 2.4382946968  | 1.7208030668  |
| C38 | -2.1831609660 | 2.2885259926  | 1.4086789618  |
| H39 | -1.7645170078 | 2.8701555685  | 0.5848746466  |
| F40 | -3.9048137759 | 0.2391388045  | 4.5595847351  |
| F41 | -4.2804432262 | 3.2869865983  | 0.9651047061  |
| C42 | 0.1100368228  | 1.2927493771  | 1.9264441789  |
| C43 | 0.9316540233  | 1.6461420578  | 3.0711204581  |
| H44 | 0.6695421182  | 1.2010440732  | 4.0379282603  |
| C45 | 1.9488598651  | 2.6159027609  | 3.0024242377  |
| H46 | 2.5457766894  | 2.8456320288  | 3.8911564731  |
| C47 | 2.0637231800  | 3.3989006709  | 1.8534610250  |
| H48 | 2.7192783029  | 4.2793232326  | 1.8521633074  |
| C49 | 1.3943100206  | 3.0411585224  | 0.6415453214  |
| C50 | 1.5956212989  | 3.7414280732  | -0.5830523044 |
| H51 | 2.1986356616  | 4.6575951991  | -0.5871686707 |
| C52 | 1.0408810033  | 3.2502543063  | -1.7552975282 |
| H53 | 1.1464629176  | 3.8158934303  | -2.6886942105 |
| C54 | 0.4261476313  | 1.9621456051  | -1.8096904665 |
| C55 | 0.3005718857  | 1.2209852728  | -0.6097018176 |
| C56 | 0.6015517681  | 1.8527171412  | 0.6285574443  |
| C57 | -0.0806976004 | 1.5014222739  | -3.1539966312 |
| H58 | -0.3050928929 | 0.4283599296  | -3.1880863967 |
| H59 | 0.6333919793  | 1.7375842243  | -3.9610455642 |
| H60 | -1.0161468402 | 2.0443416490  | -3.3906386733 |



## 11, gas phase

Total Gibbs free energy, Gtot (Htot - T\*S): -1827.816800 hartrees

|     |               |               |               |
|-----|---------------|---------------|---------------|
| Pt1 | 8.1931178502  | 8.8264038704  | 4.3122434147  |
| P2  | 8.0181452106  | 8.2060202560  | 2.0837136895  |
| F3  | 8.0361478055  | 9.4586744941  | 6.2392176671  |
| F4  | 6.8965065695  | 7.4022496837  | 4.8229814008  |
| C5  | 8.7695089279  | 6.4358477723  | 1.9232835165  |
| C6  | 9.0035450399  | 5.9220158495  | 0.4922653528  |
| H7  | 9.3969734540  | 4.8916492773  | 0.5633474265  |
| H8  | 9.7563476179  | 6.5192905577  | -0.0437642972 |
| H9  | 8.0836793775  | 5.8757005108  | -0.1087773545 |
| C10 | 10.1334536755 | 6.5043811868  | 2.6482935996  |
| H11 | 10.0172233677 | 6.8191391931  | 3.6982347919  |
| H12 | 10.8339372599 | 7.1965252599  | 2.1529465545  |
| H13 | 10.5850086337 | 5.4961304709  | 2.6326774041  |
| C14 | 7.8345224324  | 5.4762010989  | 2.6944995885  |
| H15 | 8.3691286240  | 4.5206798048  | 2.8433256294  |
| H16 | 6.9163790926  | 5.2498824637  | 2.1287691156  |
| H17 | 7.5456528350  | 5.8864646096  | 3.6766145154  |
| C18 | 6.2278298270  | 8.4082593034  | 1.3914341260  |
| C19 | 5.2473858081  | 8.3524688755  | 2.5833176282  |
| H20 | 4.2154057114  | 8.3672896189  | 2.1898124501  |
| H21 | 5.3815878901  | 9.2270763120  | 3.2396796142  |
| H22 | 5.3889651451  | 7.4663876424  | 3.2174592944  |
| C23 | 5.8328687803  | 7.3433531203  | 0.3512383494  |
| H24 | 5.8271444755  | 6.3256792742  | 0.7686019132  |
| H25 | 6.4739908034  | 7.3518226894  | -0.5446138945 |
| H26 | 4.8055216362  | 7.5636637514  | 0.0100279579  |
| C27 | 6.1483751040  | 9.8077735245  | 0.7478404878  |
| H28 | 6.7787486323  | 9.8987286967  | -0.1512819988 |
| H29 | 6.4385867922  | 10.6019873646 | 1.4529031855  |
| H30 | 5.1020011381  | 9.9938173847  | 0.4456058319  |
| C42 | 8.2137598204  | 11.6508845777 | 3.3507733067  |
| C43 | 7.3327024636  | 11.9351285810 | 4.4178487384  |
| H44 | 7.3026696025  | 11.2884972265 | 5.3046262134  |
| C45 | 6.4973299719  | 13.0458701540 | 4.3136662882  |
| C46 | 6.4852064473  | 13.8916811068 | 3.1978118441  |
| H47 | 5.8176459674  | 14.7526774957 | 3.1410847299  |
| C48 | 7.3708523080  | 13.5822031727 | 2.1656710258  |
| C49 | 8.2345866214  | 12.4840499043 | 2.2146017383  |
| H50 | 8.9169314207  | 12.3022543764 | 1.3820032457  |
| F51 | 5.6484092236  | 13.3207031831 | 5.3290254324  |
| F52 | 7.3993306256  | 14.3808711058 | 1.0721934414  |
| C53 | 9.1923990453  | 10.5100307975 | 3.4669110896  |
| C54 | 9.9615185696  | 10.3588328816 | 4.6674875162  |
| H55 | 9.5216882183  | 10.6790541908 | 5.6185831727  |
| C56 | 11.3867734363 | 10.1546726957 | 4.6195554666  |
| H57 | 11.9345849569 | 10.0788186655 | 5.5628762768  |
| C58 | 12.0532061570 | 10.2504566429 | 3.4217232232  |

|     |               |               |               |
|-----|---------------|---------------|---------------|
| H59 | 13.1480080083 | 10.2737792328 | 3.3884349966  |
| C60 | 11.3252347966 | 10.1763579168 | 2.1749227350  |
| C61 | 11.9436735474 | 9.9836063846  | 0.9148861073  |
| H62 | 13.0299179103 | 10.0904892961 | 0.8254835218  |
| C63 | 11.1780795125 | 9.6185803161  | -0.1894348104 |
| H64 | 11.6526545108 | 9.5298161705  | -1.1725195668 |
| C65 | 9.8231240907  | 9.2182989727  | -0.0535978677 |
| C66 | 9.2258862318  | 9.3351548602  | 1.2242306365  |
| C67 | 9.9129760388  | 10.0407838273 | 2.2450073200  |
| C68 | 9.0912292441  | 8.7369722441  | -1.2832260422 |
| H69 | 8.2289125261  | 8.1019328985  | -1.0430799895 |
| H70 | 9.7538257181  | 8.1788394459  | -1.9641892876 |
| H71 | 8.7061130243  | 9.6072651599  | -1.8465389812 |

## 11, acetonitrile solution

Title: nphh\_8\_C6H12F2\_Pf2\_u\_pi\_complex\_MeCN

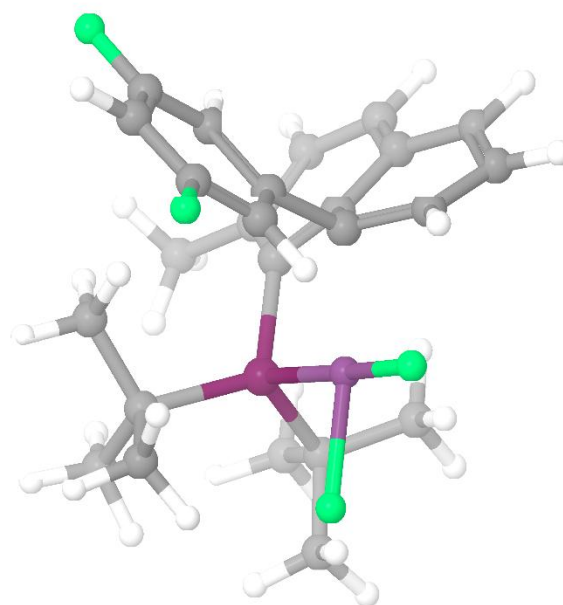

Total Gibbs free energy, Gtot (Htot - T\*S): -1827.846906 hartrees

|     |               |              |               |
|-----|---------------|--------------|---------------|
| Pt1 | 8.1423003660  | 8.7800470381 | 4.2835049774  |
| P2  | 8.0026171471  | 8.2042248701 | 2.0729229669  |
| F3  | 8.1496605320  | 9.4099507065 | 6.2650500352  |
| F4  | 6.8308529776  | 7.3537342972 | 4.9408433380  |
| C5  | 8.7095168976  | 6.4149867969 | 1.8965578802  |
| C6  | 8.9344821155  | 5.9007873114 | 0.4625521594  |
| H7  | 9.3085580688  | 4.8624834630 | 0.5352149661  |
| H8  | 9.7023246649  | 6.4817544459 | -0.0707703263 |
| H9  | 8.0168129550  | 5.8740135212 | -0.1434564427 |
| C10 | 10.0741732652 | 6.4387014992 | 2.6226525832  |
| H11 | 9.9654255379  | 6.7973351852 | 3.6599439786  |
| H12 | 10.8040976756 | 7.0851515769 | 2.1092076510  |
| H13 | 10.4834135719 | 5.4126832927 | 2.6384322460  |
| C14 | 7.7414343497  | 5.4781647949 | 2.6569183434  |
| H15 | 8.2486813702  | 4.5082449112 | 2.8111947580  |
| H16 | 6.8236242692  | 5.2773310917 | 2.0804867863  |

|     |               |               |               |
|-----|---------------|---------------|---------------|
| H17 | 7.4525633416  | 5.8953045311  | 3.6368906761  |
| C18 | 6.2358708720  | 8.4517627944  | 1.3277341982  |
| C19 | 5.2515229352  | 8.4111945291  | 2.5196905152  |
| H20 | 4.2180318254  | 8.4265566831  | 2.1289795205  |
| H21 | 5.3968352930  | 9.2937353359  | 3.1645395580  |
| H22 | 5.3886262973  | 7.5267184433  | 3.1599408001  |
| C23 | 5.8213313189  | 7.3939145432  | 0.2851890908  |
| H24 | 5.7839407180  | 6.3755924681  | 0.7010584303  |
| H25 | 6.4658271177  | 7.3855019994  | -0.6084057427 |
| H26 | 4.8014418860  | 7.6440287123  | -0.0604310185 |
| C27 | 6.1813488119  | 9.8524306520  | 0.6836166855  |
| H28 | 6.8066591652  | 9.9281050051  | -0.2201414216 |
| H29 | 6.4907855543  | 10.6415610007 | 1.3864100916  |
| H30 | 5.1369224317  | 10.0568902839 | 0.3843315403  |
| C42 | 8.2730011939  | 11.5866995979 | 3.4090098929  |
| C43 | 7.3791740658  | 11.8959114979 | 4.4575857770  |
| H44 | 7.3571301315  | 11.2786275479 | 5.3632768694  |
| C45 | 6.5259696628  | 12.9895381275 | 4.3124232311  |
| C46 | 6.5040915831  | 13.8066875362 | 3.1758864938  |
| H47 | 5.8187988628  | 14.6544835019 | 3.0854765018  |
| C48 | 7.4115747736  | 13.4779211316 | 2.1681383440  |
| C49 | 8.2963842424  | 12.3972489859 | 2.2562595544  |
| H50 | 8.9893564276  | 12.2133288497 | 1.4322591921  |
| F51 | 5.6622871512  | 13.2744112124 | 5.3193330298  |
| F52 | 7.4452974159  | 14.2459073621 | 1.0504395567  |
| C53 | 9.2790526011  | 10.4441095039 | 3.5705613299  |
| C54 | 10.1436648395 | 10.5886648487 | 4.7262734183  |
| H55 | 9.6747079015  | 10.8519786695 | 5.6805680216  |
| C56 | 11.5470439516 | 10.5282646662 | 4.6355626333  |
| H57 | 12.1573305569 | 10.6364756921 | 5.5379710553  |
| C58 | 12.1457208633 | 10.5121796345 | 3.3764814142  |
| H59 | 13.2304583570 | 10.6500465446 | 3.2810875899  |
| C60 | 11.3832410411 | 10.2508537792 | 2.1955774109  |
| C61 | 11.9855208500 | 10.0936819698 | 0.9142424836  |
| H62 | 13.0592335673 | 10.2832131716 | 0.7955263707  |
| C63 | 11.2122425796 | 9.6894581320  | -0.1635380165 |
| H64 | 11.6607144040 | 9.6233023053  | -1.1620367787 |
| C65 | 9.8651606770  | 9.2478169530  | 0.0026655286  |
| C66 | 9.2897954663  | 9.3093366005  | 1.2946840498  |
| C67 | 9.9835038664  | 9.9965953880  | 2.3298160075  |
| C68 | 9.1361309362  | 8.7811648050  | -1.2331547625 |
| H69 | 8.2420098630  | 8.1858011282  | -1.0106667408 |
| H70 | 9.7933857552  | 8.1942085934  | -1.8965325947 |
| H71 | 8.8081164976  | 9.6661149336  | -1.8124633942 |

## 12, gas phase

Total Gibbs free energy, Gtot (Htot - T\*S): -1827.839494 hartrees

|     |               |               |               |
|-----|---------------|---------------|---------------|
| Pt1 | 1.8373932546  | 0.5607515022  | -1.1764819704 |
| P2  | -0.0781902882 | -0.6001252693 | -0.8577365368 |
| F3  | 3.4570028665  | 1.7315291588  | -1.5962440478 |
| F4  | 2.9642819531  | -1.0351148400 | -1.6765136254 |
| C5  | -0.5065551442 | -1.4985824668 | -2.4983337131 |
| C6  | -1.9105345025 | -2.1219340865 | -2.5820247283 |
| H7  | -1.9950722505 | -2.6347712023 | -3.5571248871 |
| H8  | -2.7058937991 | -1.3616389601 | -2.5454225579 |
| H9  | -2.0965792570 | -2.8768066000 | -1.8030697535 |
| C10 | -0.3814832676 | -0.4183852764 | -3.5984152141 |
| H11 | 0.6334723115  | 0.0084854081  | -3.6354717094 |
| H12 | -1.0985993319 | 0.4069647478  | -3.4523787792 |
| H13 | -0.5983003918 | -0.8881969381 | -4.5744700278 |
| C14 | 0.5800445085  | -2.5761841548 | -2.7153625742 |
| H15 | 0.4988854239  | -2.9447214257 | -3.7538987163 |
| H16 | 0.4390873388  | -3.4438872774 | -2.0498596462 |
| H17 | 1.5942477978  | -2.1672011652 | -2.5552807773 |
| C18 | 0.0160653240  | -1.7154042090 | 0.7053204051  |
| C19 | 1.5113356672  | -2.0870970156 | 0.8649382772  |
| H20 | 1.6039689727  | -2.8453750775 | 1.6629420212  |
| H21 | 2.1023318394  | -1.2033230216 | 1.1530493875  |
| H22 | 1.9685592959  | -2.4719185196 | -0.0589387579 |
| C23 | -0.8227580324 | -3.0058974529 | 0.6534523836  |
| H24 | -0.5153669507 | -3.6714965228 | -0.1674044751 |
| H25 | -1.9052558890 | -2.8235007148 | 0.5713956197  |
| H26 | -0.6635693388 | -3.5572428109 | 1.5974358241  |
| C27 | -0.4102471081 | -0.8484068194 | 1.9079833474  |
| H28 | -1.4885329262 | -0.6234491706 | 1.9080129827  |
| H29 | 0.1437614116  | 0.1048385565  | 1.9373642089  |
| H30 | -0.1779549634 | -1.3968533004 | 2.8380407554  |
| C31 | 2.1185705420  | 3.4518659412  | 0.8631836433  |
| C32 | 3.3926601345  | 2.8962019964  | 1.0722582951  |
| H33 | 3.9228082183  | 2.4276221790  | 0.2341479897  |
| C34 | 3.9196584229  | 2.9220984156  | 2.3649838307  |
| C35 | 3.2366737139  | 3.4703109788  | 3.4559264389  |
| H36 | 3.6737625887  | 3.4823980784  | 4.4556853795  |
| C37 | 1.9701076961  | 4.0004763265  | 3.2054378563  |
| C38 | 1.3918107867  | 4.0028061537  | 1.9336568569  |
| H39 | 0.4018579757  | 4.4417083167  | 1.7931839385  |
| F40 | 5.1461158512  | 2.3951085442  | 2.5829816493  |
| F41 | 1.2748469489  | 4.5389017341  | 4.2371741028  |
| C42 | 0.8153595246  | 2.1104971432  | -0.7747920325 |
| C43 | 1.5098380307  | 3.4332132111  | -0.5683861551 |
| H44 | 2.3927602959  | 3.3956547189  | -1.2461950633 |
| C45 | 0.6601638565  | 4.6438769645  | -0.7905358117 |
| H46 | 1.1704307943  | 5.6118955009  | -0.8386039832 |
| C47 | -0.6909226471 | 4.5664375798  | -0.8486395195 |

|     |               |               |               |
|-----|---------------|---------------|---------------|
| H48 | -1.3041542677 | 5.4648176583  | -0.9759307917 |
| C49 | -1.3783915384 | 3.2910899022  | -0.7072053817 |
| C50 | -2.7813180920 | 3.2135504324  | -0.5926350873 |
| H51 | -3.3759497136 | 4.1329338558  | -0.6110076327 |
| C52 | -3.4037145258 | 1.9819707644  | -0.4247833081 |
| H53 | -4.4910739119 | 1.9454780500  | -0.2919633901 |
| C54 | -2.6888213855 | 0.7552032105  | -0.4167912747 |
| C55 | -1.2967700109 | 0.8030735269  | -0.6142125830 |
| C56 | -0.6355271156 | 2.0715562853  | -0.6998670955 |
| C57 | -3.4908278884 | -0.4931871974 | -0.1356231631 |
| H58 | -2.9021281279 | -1.4104253948 | -0.2384829880 |
| H59 | -4.3606766700 | -0.5711977220 | -0.8099094383 |
| H60 | -3.8882180474 | -0.4622308175 | 0.8947311744  |

## 12, acetonitrile solution

Title: nphb\_h\_h7\_C0H9F2\_Pf2\_MeCN

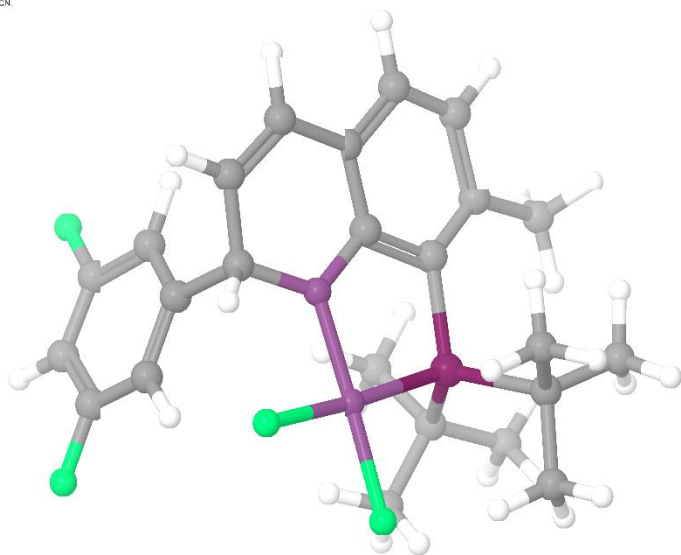

Total Gibbs free energy, Gtot (Htot - T\*S): -1827.870346 hartrees

|     |               |               |               |
|-----|---------------|---------------|---------------|
| Pt1 | 1.8426041901  | 0.6081069728  | -1.2313171594 |
| P2  | -0.0771464532 | -0.5679180993 | -0.8504098539 |
| F3  | 3.4928132737  | 1.7854869471  | -1.6967094883 |
| F4  | 3.0475684453  | -0.9487389389 | -1.7927586592 |
| C5  | -0.5047003381 | -1.5386566793 | -2.4531801622 |
| C6  | -1.8953842601 | -2.1984082620 | -2.4990049972 |
| H7  | -1.9674470297 | -2.7523062912 | -3.4533723278 |
| H8  | -2.7081628604 | -1.4562127498 | -2.4937052619 |
| H9  | -2.0616514356 | -2.9245952545 | -1.6888334080 |
| C10 | -0.4186997617 | -0.5007974323 | -3.5958777891 |
| H11 | 0.5781013290  | -0.0325827270 | -3.6389815738 |
| H12 | -1.1705793667 | 0.2984746941  | -3.4852275596 |
| H13 | -0.6093519548 | -1.0162909873 | -4.5543408459 |
| C14 | 0.6005028039  | -2.6041731825 | -2.6387569772 |
| H15 | 0.5059536539  | -3.0224702872 | -3.6576578988 |
| H16 | 0.4900354621  | -3.4418784114 | -1.9301544342 |
| H17 | 1.6082335778  | -2.1685108644 | -2.5215914283 |

|     |               |               |               |
|-----|---------------|---------------|---------------|
| C18 | 0.0518990642  | -1.6264542000 | 0.7558365057  |
| C19 | 1.5484850286  | -1.9904514558 | 0.9078464497  |
| H20 | 1.6596646676  | -2.6696075760 | 1.7721508139  |
| H21 | 2.1510869848  | -1.0860047188 | 1.0919261818  |
| H22 | 1.9650891036  | -2.4823941218 | 0.0158369997  |
| C23 | -0.7847207472 | -2.9217660301 | 0.7640669100  |
| H24 | -0.4879807372 | -3.6208127944 | -0.0332373922 |
| H25 | -1.8691913564 | -2.7457823686 | 0.6937739900  |
| H26 | -0.6060357052 | -3.4325412252 | 1.7281269916  |
| C27 | -0.3615244651 | -0.7196209683 | 1.9344497682  |
| H28 | -1.4415096539 | -0.5017540294 | 1.9392003551  |
| H29 | 0.1864548958  | 0.2380884340  | 1.9266406861  |
| H30 | -0.1155192939 | -1.2382752969 | 2.8788202532  |
| C31 | 2.0853843476  | 3.4045567590  | 0.9028545298  |
| C32 | 3.3565205710  | 2.8328104100  | 1.0932456873  |
| H33 | 3.8989729520  | 2.4225234405  | 0.2337525815  |
| C34 | 3.8687168472  | 2.7684612125  | 2.3909392817  |
| C35 | 3.1795900061  | 3.2424575467  | 3.5122060956  |
| H36 | 3.6048864171  | 3.1845019880  | 4.5184403917  |
| C37 | 1.9177773815  | 3.7938081411  | 3.2757361673  |
| C38 | 1.3506376899  | 3.8862947850  | 2.0011293826  |
| H39 | 0.3633321154  | 4.3400901910  | 1.8829471312  |
| F40 | 5.0952587718  | 2.2189193900  | 2.5796062213  |
| F41 | 1.2111384156  | 4.2663993459  | 4.3336324456  |
| C42 | 0.8005461081  | 2.1438576008  | -0.7862481186 |
| C43 | 1.4931980126  | 3.4651859599  | -0.5354070568 |
| H44 | 2.3765377867  | 3.4856669968  | -1.2076534639 |
| C45 | 0.6446541038  | 4.6875833817  | -0.7090411499 |
| H46 | 1.1601979104  | 5.6551481911  | -0.7179939812 |
| C47 | -0.7063776629 | 4.6093980813  | -0.7803816001 |
| H48 | -1.3223212841 | 5.5108715321  | -0.8784714903 |
| C49 | -1.3887278553 | 3.3272873617  | -0.6813086043 |
| C50 | -2.7941532022 | 3.2472383405  | -0.5742506516 |
| H51 | -3.3928280390 | 4.1659397417  | -0.5797868463 |
| C52 | -3.4133873260 | 2.0105191283  | -0.4239347493 |
| H53 | -4.5027272825 | 1.9705513366  | -0.2950013469 |
| C54 | -2.6963988775 | 0.7792857062  | -0.4211791662 |
| C55 | -1.3047883822 | 0.8313668463  | -0.6260120880 |
| C56 | -0.6437848048 | 2.1041885387  | -0.7013965491 |
| C57 | -3.5082578870 | -0.4620523050 | -0.1389224008 |
| H58 | -2.9221657321 | -1.3852787485 | -0.1955848022 |
| H59 | -4.3550972986 | -0.5504016887 | -0.8422799670 |
| H60 | -3.9434769777 | -0.3981567099 | 0.8754840183  |

### 13, gas phase

Total Gibbs free energy, Gtot (Htot - T\*S): -1827.891255 hartrees

|     |               |               |               |
|-----|---------------|---------------|---------------|
| Pt1 | 1.4712264069  | -0.1463177329 | -0.4685376678 |
| P2  | -0.4857748351 | -1.1435178871 | -0.1432198910 |
| F3  | 3.5249929724  | 0.3295980263  | -1.2727644167 |
| F4  | 2.8667030678  | -1.7941630771 | -0.9003024193 |
| C5  | -0.8472061175 | -2.1140155419 | -1.7617907743 |
| C6  | -2.2613162666 | -2.7170315882 | -1.8522861867 |
| H7  | -2.3383813260 | -3.2558575189 | -2.8138486011 |
| H8  | -3.0400928957 | -1.9395782189 | -1.8519838736 |
| H9  | -2.4776625761 | -3.4449236219 | -1.0555734812 |
| C10 | -0.6865297336 | -1.0846793134 | -2.9047188023 |
| H11 | 0.3344693589  | -0.6710806565 | -2.9345159365 |
| H12 | -1.3927390894 | -0.2443126142 | -2.8033607587 |
| H13 | -0.8914875885 | -1.5911341091 | -3.8649721227 |
| C14 | 0.2159768734  | -3.2224450299 | -1.9157905009 |
| H15 | 0.1058525043  | -3.6700233349 | -2.9199173672 |
| H16 | 0.0813882309  | -4.0344843226 | -1.1821715741 |
| H17 | 1.2424066106  | -2.8320754123 | -1.8223019184 |
| C18 | -0.4220135155 | -2.2204875574 | 1.4517962430  |
| C19 | 1.0420620946  | -2.6920172769 | 1.6188225196  |
| H20 | 1.1024933278  | -3.3294844096 | 2.5195720368  |
| H21 | 1.7237970020  | -1.8368115393 | 1.7486347291  |
| H22 | 1.4084589837  | -3.2728416267 | 0.7593110988  |
| C23 | -1.3370324215 | -3.4604328333 | 1.4606151651  |
| H24 | -1.0920456892 | -4.1682805510 | 0.6536903908  |
| H25 | -2.4079955824 | -3.2168415697 | 1.4040882725  |
| H26 | -1.1812740645 | -3.9924641613 | 2.4163420868  |
| C27 | -0.7793006142 | -1.2804838621 | 2.6214688039  |
| H28 | -1.8352716553 | -0.9685957559 | 2.6037345458  |
| H29 | -0.1531129109 | -0.3726731748 | 2.6136386611  |
| H30 | -0.5939159391 | -1.8108464957 | 3.5723006852  |
| C31 | 2.5884044012  | 2.9204847417  | -0.0074415444 |
| C32 | 3.3143147661  | 3.8226403131  | -0.8117042285 |
| H33 | 2.8282666376  | 4.3898211250  | -1.6087157221 |
| C34 | 4.6887803532  | 3.9569550094  | -0.6116351736 |
| C35 | 5.3843796882  | 3.2378622281  | 0.3639502745  |
| H36 | 6.4603956246  | 3.3548133639  | 0.5006284313  |
| C37 | 4.6376961533  | 2.3570232993  | 1.1489928108  |
| C38 | 3.2609165364  | 2.1928712850  | 0.9959229474  |
| H39 | 2.7196329084  | 1.5025733352  | 1.6474569569  |
| F40 | 5.3818392352  | 4.8185968785  | -1.3936986117 |
| F41 | 5.2778441903  | 1.6428546975  | 2.1050183239  |
| C42 | 0.4606169059  | 1.5399186210  | -0.2157163850 |
| C43 | 1.1146144406  | 2.7869592299  | -0.1606255779 |
| C44 | 0.3504670889  | 3.9922253704  | -0.1980008301 |
| H45 | 0.8922722023  | 4.9435963623  | -0.1803929892 |
| C46 | -1.0299500159 | 3.9824938996  | -0.2046974698 |
| H47 | -1.5990387826 | 4.9174744025  | -0.2155826796 |

|     |               |               |               |
|-----|---------------|---------------|---------------|
| C48 | -1.7256488906 | 2.7462213207  | -0.1281547196 |
| C49 | -3.1397638258 | 2.6826688289  | -0.0046069479 |
| H50 | -3.7133519389 | 3.6159042130  | -0.0136750241 |
| C51 | -3.7797706979 | 1.4718071775  | 0.1638054053  |
| H52 | -4.8670564567 | 1.4436278180  | 0.2958878907  |
| C53 | -3.0670201815 | 0.2361901116  | 0.1934679295  |
| C54 | -1.6798822491 | 0.2647839323  | -0.0041711856 |
| C55 | -0.9790963614 | 1.5157803764  | -0.1374138910 |
| C56 | -3.8890595457 | -0.9910980452 | 0.5094307438  |
| H57 | -3.3365298759 | -1.9277377719 | 0.3858079902  |
| H58 | -4.7859524865 | -1.0436701696 | -0.1315692936 |
| H59 | -4.2497361187 | -0.9484631154 | 1.5534344970  |
| H60 | 3.4673216972  | -0.7634225931 | -1.2022218021 |

### 13, acetonitrile solution

Title: n0th\_7\_C0H3F2\_Pf\_a\_McCN

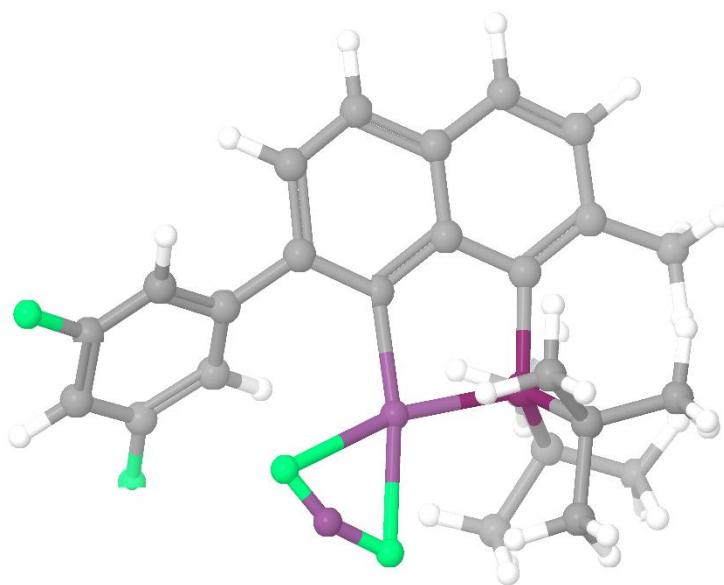

Total Gibbs free energy, Gtot (Htot - T\*S): -1827.908637 hartrees

|     |               |               |               |
|-----|---------------|---------------|---------------|
| Pt1 | 1.4671391425  | -0.1398737163 | -0.4856237072 |
| P2  | -0.4963423083 | -1.1516365262 | -0.1289179175 |
| F3  | 3.5320689304  | 0.3497793771  | -1.3817572308 |
| F4  | 2.9171446186  | -1.7767690908 | -0.9360817519 |
| C5  | -0.8550524092 | -2.1428842300 | -1.7402982655 |
| C6  | -2.2650940399 | -2.7591167268 | -1.8245898308 |
| H7  | -2.3275905857 | -3.3117401419 | -2.7803330388 |
| H8  | -3.0511345940 | -1.9888586642 | -1.8428878524 |
| H9  | -2.4792305617 | -3.4780027656 | -1.0189879901 |
| C10 | -0.7009179473 | -1.1282304834 | -2.8965123560 |
| H11 | 0.3130242154  | -0.6954218360 | -2.9101189954 |
| H12 | -1.4258117541 | -0.3013773673 | -2.8183336766 |
| H13 | -0.8793903683 | -1.6509966849 | -3.8533944850 |
| C14 | 0.2141508790  | -3.2486078661 | -1.8814124481 |
| H15 | 0.1043277887  | -3.7061692046 | -2.8814671540 |



|     |               |               |               |
|-----|---------------|---------------|---------------|
| H16 | 0.0856474494  | -4.0540240958 | -1.1394542693 |
| H17 | 1.2376840725  | -2.8497718547 | -1.7961737922 |
| C18 | -0.4173777105 | -2.2127612076 | 1.4800223594  |
| C19 | 1.0448313788  | -2.6938741264 | 1.6330592122  |
| H20 | 1.1180290622  | -3.2947309171 | 2.5575238162  |
| H21 | 1.7364102974  | -1.8395459036 | 1.7116065980  |
| H22 | 1.3771720027  | -3.3207871226 | 0.7918713465  |
| C23 | -1.3401550388 | -3.4486425691 | 1.5054723622  |
| H24 | -1.1092358671 | -4.1641474174 | 0.7005852214  |
| H25 | -2.4112759656 | -3.2014585012 | 1.4645888458  |
| H26 | -1.1696697102 | -3.9729507096 | 2.4637643450  |
| C27 | -0.7565092848 | -1.2639221207 | 2.6486722252  |
| H28 | -1.8106931144 | -0.9448334895 | 2.6370363624  |
| H29 | -0.1207178985 | -0.3617833691 | 2.6400703968  |
| H30 | -0.5709953314 | -1.7977211063 | 3.5981766738  |
| C31 | 2.5996099716  | 2.9199264419  | 0.0111144365  |
| C32 | 3.3264313345  | 3.8563538416  | -0.7566918012 |
| H33 | 2.8421815748  | 4.4584414364  | -1.5314527869 |
| C34 | 4.6988366177  | 3.9946052833  | -0.5373180768 |
| C35 | 5.4017521170  | 3.2500223589  | 0.4153413162  |
| H36 | 6.4767110179  | 3.3790686084  | 0.5701951983  |
| C37 | 4.6518152317  | 2.3355044183  | 1.1589690295  |
| C38 | 3.2770331023  | 2.1624568509  | 0.9916105860  |
| H39 | 2.7392166685  | 1.4486658797  | 1.6219061653  |
| F40 | 5.3884958208  | 4.8951047714  | -1.2833160160 |
| F41 | 5.2903135737  | 1.5910113874  | 2.0982181086  |
| C42 | 0.4610666148  | 1.5447835968  | -0.2098168874 |
| C43 | 1.1229146458  | 2.7900644406  | -0.1438460043 |
| C44 | 0.3611197104  | 4.0008844017  | -0.1623818156 |
| H45 | 0.9017364917  | 4.9541815630  | -0.1330363457 |
| C46 | -1.0210754617 | 3.9932860211  | -0.1656499266 |
| H47 | -1.5877657836 | 4.9312915258  | -0.1647190045 |
| C48 | -1.7215954560 | 2.7558474906  | -0.1029009600 |
| C49 | -3.1392065484 | 2.6975333151  | 0.0178364639  |
| H50 | -3.7120063690 | 3.6329898614  | 0.0146854363  |
| C51 | -3.7808596730 | 1.4845655107  | 0.1750046468  |
| H52 | -4.8700168558 | 1.4564437234  | 0.3027545158  |
| C53 | -3.0704427931 | 0.2439227219  | 0.1995920237  |
| C54 | -1.6818461353 | 0.2700878706  | 0.0026759128  |
| C55 | -0.9797372278 | 1.5221120390  | -0.1248553540 |
| C56 | -3.9004336890 | -0.9809920269 | 0.5020930227  |
| H57 | -3.3457751273 | -1.9197556114 | 0.4034475751  |
| H58 | -4.7790397839 | -1.0359413844 | -0.1647847227 |
| H59 | -4.2905501035 | -0.9255877971 | 1.5355400980  |
| H60 | 3.4689449453  | -0.7446537715 | -1.2723963641 |

## 14, gas phase

Total Gibbs free energy, Gtot (Htot - T\*S): -1727.534057 hartrees

|     |               |               |               |
|-----|---------------|---------------|---------------|
| Pt1 | 1.4546989970  | 0.2175686769  | 0.2347590622  |
| P2  | -0.4778979630 | -0.9014443552 | 0.1585449125  |
| F3  | 2.7834099792  | -1.3192041729 | -0.0054220557 |
| C4  | -0.5624223183 | -1.7760799432 | -1.5440753414 |
| C5  | -1.9091609839 | -2.4446602501 | -1.8741266101 |
| H6  | -1.8195064239 | -2.9227698335 | -2.8663436370 |
| H7  | -2.7287872919 | -1.7120507260 | -1.9369429255 |
| H8  | -2.1868594224 | -3.2335813842 | -1.1590071460 |
| C9  | -0.2948506033 | -0.6643433789 | -2.5844613725 |
| H10 | 0.6944477379  | -0.2039177784 | -2.4298800399 |
| H11 | -1.0563449842 | 0.1323031491  | -2.5453833844 |
| H12 | -0.3211414061 | -1.1147917892 | -3.5931570745 |
| C13 | 0.5908401748  | -2.8040155182 | -1.5875590239 |
| H14 | 0.7153094888  | -3.1417714752 | -2.6324868745 |
| H15 | 0.3685179877  | -3.6981872305 | -0.9820409330 |
| H16 | 1.5453245812  | -2.3700355191 | -1.2328670456 |
| C17 | -0.5924998017 | -2.0747988367 | 1.6867597236  |
| C18 | 0.8616899834  | -2.4142480966 | 2.1006376071  |
| H19 | 0.8350994963  | -3.2343845685 | 2.8408080950  |
| H20 | 1.3403576195  | -1.5390545201 | 2.5677459972  |
| H21 | 1.5119832147  | -2.6963887855 | 1.2587063941  |
| C22 | -1.3617798707 | -3.3886334506 | 1.4464961882  |
| H23 | -0.8850519518 | -4.0188381631 | 0.6804714609  |
| H24 | -2.4168641925 | -3.2380511457 | 1.1720583168  |
| H25 | -1.3567201985 | -3.9634924871 | 2.3900529388  |
| C26 | -1.2534096224 | -1.2730682394 | 2.8266462639  |
| H27 | -2.3236767125 | -1.0839804044 | 2.6518254836  |
| H28 | -0.7516350201 | -0.3030179001 | 2.9782429603  |
| H29 | -1.1571355835 | -1.8516004509 | 3.7627141260  |
| C30 | 2.4086540763  | 3.0486215541  | 0.0446743705  |
| C31 | 3.1127974779  | 3.9160092782  | -0.8079652961 |
| H32 | 2.6091402011  | 4.7279487196  | -1.3371240123 |
| C33 | 4.4688726514  | 3.6768334724  | -1.0498174182 |
| C34 | 5.1772566690  | 2.6038566001  | -0.4932260879 |
| H35 | 6.2337951133  | 2.4438274988  | -0.7120096791 |
| C36 | 4.4736078033  | 1.7704625559  | 0.3743682486  |
| C37 | 3.1099392527  | 1.9634114589  | 0.6660594349  |
| H38 | 2.7057607002  | 1.4891679257  | 1.5813549525  |
| F39 | 5.1302535221  | 4.5077733298  | -1.8825558213 |
| F40 | 5.1295708276  | 0.7706252935  | 0.9844324750  |
| C41 | 0.3253665650  | 1.8290180410  | 0.2739675385  |
| C42 | 0.9436615005  | 3.0934461980  | 0.1944936676  |
| C43 | 0.1668405876  | 4.2855606464  | 0.1450680868  |
| H44 | 0.6707475102  | 5.2572172126  | 0.0936573502  |
| C45 | -1.2159315747 | 4.2230991584  | 0.1854899879  |
| H46 | -1.8163919412 | 5.1383407356  | 0.1755788268  |
| C47 | -1.8838328682 | 2.9619497925  | 0.2359284098  |

|     |               |               |               |
|-----|---------------|---------------|---------------|
| C48 | -3.2995674069 | 2.8392859810  | 0.2643767802  |
| H49 | -3.9146819418 | 3.7458626262  | 0.2563130633  |
| C50 | -3.8972166034 | 1.5933005627  | 0.3039693390  |
| H51 | -4.9902367262 | 1.5189682331  | 0.3343705468  |
| C52 | -3.1456991732 | 0.3785589078  | 0.3001765611  |
| C53 | -1.7484934849 | 0.4665500816  | 0.2527924857  |
| C54 | -1.1064937034 | 1.7538539081  | 0.2556553929  |
| C55 | -3.9429419838 | -0.9018095923 | 0.3838374386  |
| H56 | -3.3208673868 | -1.7998827913 | 0.3025333749  |
| H57 | -4.7043936177 | -0.9485674347 | -0.4141094884 |
| H58 | -4.4880351258 | -0.9547203845 | 1.3436078039  |

#### 14, acetonitrile solution

Title: mpth\_7\_08H9F2\_PIF\_MoCN

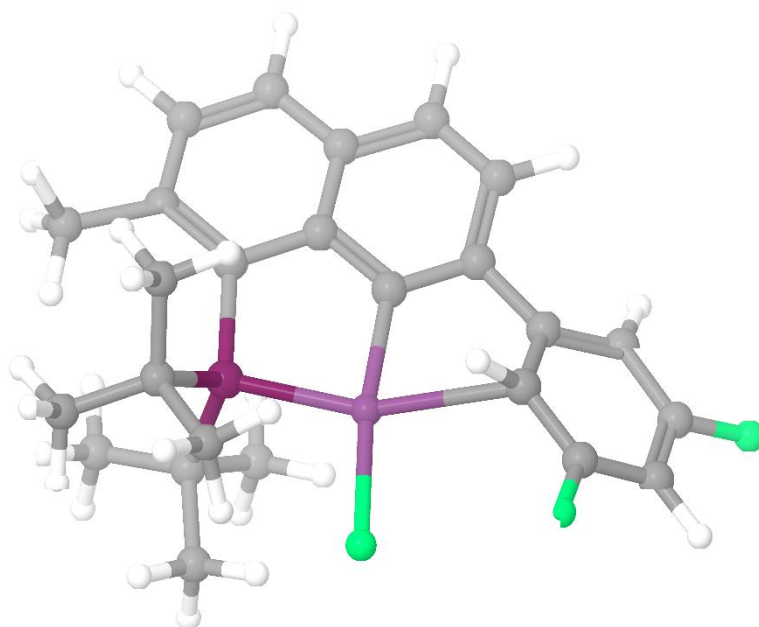

Total Gibbs free energy, Gtot (Htot - T\*S): -1727.553372 hartrees

|     |               |               |               |
|-----|---------------|---------------|---------------|
| Pt1 | 1.4586886235  | 0.2023023709  | 0.2192556697  |
| P2  | -0.4956070235 | -0.9149447546 | 0.1570794009  |
| F3  | 2.8587033236  | -1.3127266281 | -0.0520993254 |
| C4  | -0.5945899859 | -1.7830996806 | -1.5496980598 |
| C5  | -1.9393031566 | -2.4636826310 | -1.8678783559 |
| H6  | -1.8517772584 | -2.9329973217 | -2.8653184026 |
| H7  | -2.7652804507 | -1.7371280913 | -1.9201276327 |
| H8  | -2.2035686551 | -3.2591853917 | -1.1546724150 |
| C9  | -0.3530683518 | -0.6637453830 | -2.5878250915 |
| H10 | 0.6194979056  | -0.1726192630 | -2.4189243213 |
| H11 | -1.1395806822 | 0.1083016719  | -2.5538658012 |
| H12 | -0.3572143604 | -1.1115575551 | -3.5976924984 |
| C13 | 0.5658701840  | -2.8027246673 | -1.6112741988 |
| H14 | 0.6803769995  | -3.1342282711 | -2.6597767914 |
| H15 | 0.3580220555  | -3.7007712732 | -1.0056275771 |
| H16 | 1.5197157767  | -2.3615653542 | -1.2664238398 |
| C17 | -0.6070603545 | -2.0852753810 | 1.6905799689  |
| C18 | 0.8460856797  | -2.4370330538 | 2.0916827302  |

|     |               |               |               |
|-----|---------------|---------------|---------------|
| H19 | 0.8164195150  | -3.2095957242 | 2.8813625198  |
| H20 | 1.3594961421  | -1.5462577881 | 2.4884077064  |
| H21 | 1.4561219035  | -2.8013089211 | 1.2516887357  |
| C22 | -1.3875977794 | -3.3946961560 | 1.4573469354  |
| H23 | -0.9227936211 | -4.0284430439 | 0.6860557581  |
| H24 | -2.4444216886 | -3.2375284991 | 1.1937301072  |
| H25 | -1.3753601203 | -3.9686021847 | 2.4021963351  |
| C26 | -1.2499352690 | -1.2749000794 | 2.8355850289  |
| H27 | -2.3175508950 | -1.0696483096 | 2.6625269131  |
| H28 | -0.7328543534 | -0.3123500914 | 2.9891096587  |
| H29 | -1.1624380473 | -1.8568341488 | 3.7709979173  |
| C30 | 2.4087066091  | 3.0459896453  | 0.0302890545  |
| C31 | 3.1142489897  | 3.9253732389  | -0.8119042271 |
| H32 | 2.6119555003  | 4.7346517750  | -1.3505070207 |
| C33 | 4.4816612236  | 3.7118383366  | -1.0166570390 |
| C34 | 5.2040632523  | 2.6551336102  | -0.4425377716 |
| H35 | 6.2732697193  | 2.5216476520  | -0.6313075507 |
| C36 | 4.4902123111  | 1.8119402274  | 0.4066680666  |
| C37 | 3.1165212422  | 1.9757966408  | 0.6702584323  |
| H38 | 2.7085194639  | 1.5040405787  | 1.5848015792  |
| F39 | 5.1466257202  | 4.5587534307  | -1.8319258819 |
| F40 | 5.1496838084  | 0.8186656621  | 1.0360415571  |
| C41 | 0.3196531751  | 1.8129832477  | 0.2556258472  |
| C42 | 0.9404739739  | 3.0772124931  | 0.1673096620  |
| C43 | 0.1649544967  | 4.2725469930  | 0.1107420666  |
| H44 | 0.6710776337  | 5.2441870000  | 0.0518487749  |
| C45 | -1.2187872911 | 4.2142079478  | 0.1540253440  |
| H46 | -1.8175073643 | 5.1321077616  | 0.1375962652  |
| C47 | -1.8890895447 | 2.9532543554  | 0.2172768715  |
| C48 | -3.3077506715 | 2.8391508913  | 0.2527746664  |
| H49 | -3.9199411133 | 3.7494520078  | 0.2395988093  |
| C50 | -3.9092426600 | 1.5942866812  | 0.3058792428  |
| H51 | -5.0036723516 | 1.5235992760  | 0.3410248772  |
| C52 | -3.1615441638 | 0.3739863466  | 0.3083205049  |
| C53 | -1.7621105072 | 0.4571590636  | 0.2537505040  |
| C54 | -1.1141863390 | 1.7415996969  | 0.2435883463  |
| C55 | -3.9705998200 | -0.8981812655 | 0.4003114493  |
| H56 | -3.3607237393 | -1.8052023456 | 0.3237589494  |
| H57 | -4.7331951422 | -0.9373123842 | -0.3978970232 |
| H58 | -4.5170301270 | -0.9357299437 | 1.3610131809  |

## 15, gas phase

Total Gibbs free energy, Gtot (Htot - T\*S): -1727.512258 hartrees

|     |               |               |               |
|-----|---------------|---------------|---------------|
| Pt1 | 1.5803834345  | 0.0887643930  | -0.0719700199 |
| P2  | -0.4905050716 | -1.1484989944 | -0.0565178023 |
| F3  | 2.6274761638  | -1.2208065424 | 1.0483352885  |
| C4  | -0.6778165385 | -2.1699632141 | -1.6798023369 |
| C5  | -1.6071654251 | -3.3976926414 | -1.6248692592 |
| H6  | -1.5516302086 | -3.9192012914 | -2.5977065050 |
| H7  | -2.6627365061 | -3.1354153012 | -1.4640344081 |
| H8  | -1.3029013078 | -4.1205540856 | -0.8523888332 |
| C9  | -1.1640830717 | -1.1922692680 | -2.7702442086 |
| H10 | -0.5227579646 | -0.2971821747 | -2.8361007860 |
| H11 | -2.1981370864 | -0.8545765656 | -2.5988631438 |
| H12 | -1.1280012440 | -1.7013417244 | -3.7499732772 |
| C13 | 0.7476720552  | -2.6544577801 | -2.0400271435 |
| H14 | 0.7080471523  | -3.2055863360 | -2.9970735819 |
| H15 | 1.1685513636  | -3.3279305866 | -1.2778085412 |
| H16 | 1.4462002619  | -1.8102143595 | -2.1608180911 |
| C17 | -0.6352610145 | -2.1627198721 | 1.5602404691  |
| C18 | 0.4126117288  | -3.2942094013 | 1.4725985834  |
| H19 | 0.4564912188  | -3.8041858358 | 2.4521982937  |
| H20 | 1.4097323829  | -2.8725572919 | 1.2592037712  |
| H21 | 0.1518731108  | -4.0575414249 | 0.7214800906  |
| C22 | -2.0268159239 | -2.7259518565 | 1.8893282561  |
| H23 | -2.4020136570 | -3.4231154481 | 1.1235881109  |
| H24 | -2.7690065293 | -1.9268842926 | 2.0416417168  |
| H25 | -1.9543404391 | -3.2913291837 | 2.8363423397  |
| C26 | -0.2049724783 | -1.1826605282 | 2.6782767933  |
| H27 | -0.8269486858 | -0.2721709002 | 2.7005021428  |
| H28 | 0.8535316253  | -0.9019269304 | 2.5604717345  |
| H29 | -0.3184487206 | -1.6911357000 | 3.6528488220  |
| C30 | 2.5377637167  | 2.8471970568  | 0.0780607079  |
| C31 | 3.4023581061  | 3.9567504674  | 0.1465077209  |
| H32 | 3.0382495794  | 4.9800546874  | 0.2647701235  |
| C33 | 4.7770245617  | 3.7300570201  | 0.0541702307  |
| C34 | 5.3196671007  | 2.4525079894  | -0.1089635329 |
| H35 | 6.3982506615  | 2.3041182098  | -0.1898473114 |
| C36 | 4.4292346365  | 1.3707640510  | -0.1702420013 |
| C37 | 3.0486809730  | 1.5264468690  | -0.0642376848 |
| F38 | 5.6216991978  | 4.7894054529  | 0.1155560719  |
| F39 | 4.9552288404  | 0.1368112756  | -0.3531313353 |
| C40 | 0.3996120152  | 1.6949036207  | 0.0381957960  |
| C41 | 1.0684833176  | 2.9222747953  | 0.1532208161  |
| C42 | 0.2929567110  | 4.0979183313  | 0.3543370177  |
| H43 | 0.7927935165  | 5.0646159569  | 0.4684555119  |
| C44 | -1.0880041406 | 4.0262279874  | 0.4020248342  |
| H45 | -1.6838771812 | 4.9343802118  | 0.5382511398  |
| C46 | -1.7702902515 | 2.7823034961  | 0.2720719808  |
| C47 | -3.1863277616 | 2.6906215154  | 0.2906951260  |

|     |               |               |               |
|-----|---------------|---------------|---------------|
| H48 | -3.7755657118 | 3.6047203355  | 0.4226930180  |
| C49 | -3.8138042503 | 1.4714910954  | 0.1327852906  |
| H50 | -4.9082078372 | 1.4215162275  | 0.1286235774  |
| C51 | -3.0875320847 | 0.2519578099  | -0.0230945206 |
| C52 | -1.6846691755 | 0.2870702688  | -0.0072630548 |
| C53 | -1.0133512252 | 1.5650287501  | 0.1004962526  |
| C54 | -3.9278026027 | -0.9826561566 | -0.2447341196 |
| H55 | -3.3541966426 | -1.9114569048 | -0.1735468947 |
| H56 | -4.3986592135 | -0.9496831145 | -1.2444416947 |
| H57 | -4.7499108561 | -1.0371132600 | 0.4891696789  |
| H58 | 1.2346390004  | 0.6343722089  | -1.4837264220 |

## 15, acetonitrile solution

Title: nphh\_7\_C8H2F2\_PLH\_F\_MeCN

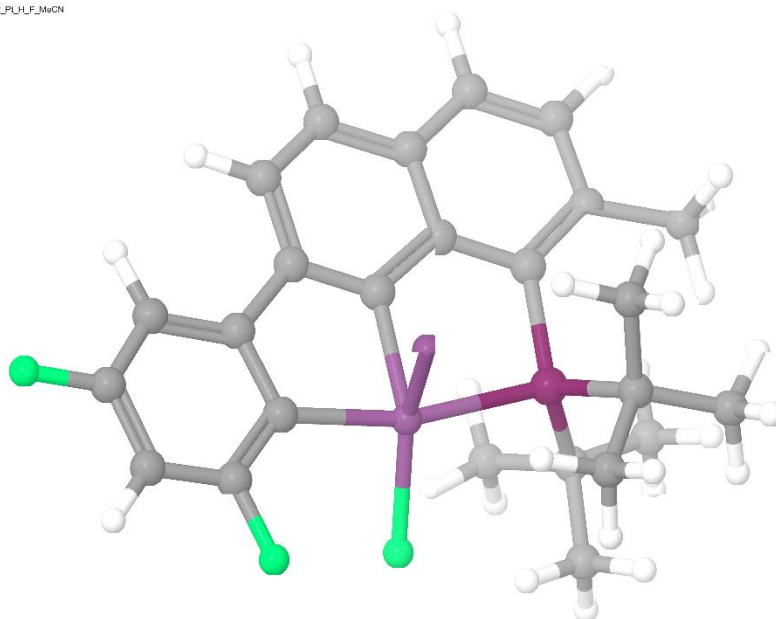

Total Gibbs free energy, Gtot (Htot - T\*S): -1727.531243 hartrees

|     |               |               |               |
|-----|---------------|---------------|---------------|
| Pt1 | 1.5788966129  | 0.0833484192  | -0.0258107707 |
| P2  | -0.5012603960 | -1.1561446770 | -0.0485018502 |
| F3  | 2.6465111400  | -1.1893611184 | 1.1668843858  |
| C4  | -0.6530094232 | -2.1453980538 | -1.6995956722 |
| C5  | -1.5917301895 | -3.3689583698 | -1.6823931713 |
| H6  | -1.5136845550 | -3.8715629104 | -2.6640918292 |
| H7  | -2.6501669019 | -3.1045325520 | -1.5415417258 |
| H8  | -1.3069225128 | -4.1084610086 | -0.9173776195 |
| C9  | -1.1121688135 | -1.1463291568 | -2.7839366283 |
| H10 | -0.4597143351 | -0.2569676786 | -2.8380323716 |
| H11 | -2.1460751397 | -0.8019794435 | -2.6225186504 |
| H12 | -1.0682142134 | -1.6489987342 | -3.7671626776 |
| C13 | 0.7759562964  | -2.6349695275 | -2.0400595324 |
| H14 | 0.7556123263  | -3.1448837183 | -3.0202073195 |
| H15 | 1.1625583805  | -3.3493733248 | -1.2968413679 |
| H16 | 1.4871332752  | -1.7939740807 | -2.1053005489 |
| C17 | -0.6610853742 | -2.2047688223 | 1.5491294423  |
| C18 | 0.3951012208  | -3.3289115329 | 1.4506605515  |

|     |               |               |               |
|-----|---------------|---------------|---------------|
| H19 | 0.4301514455  | -3.8558560841 | 2.4220637459  |
| H20 | 1.3918987170  | -2.8996990850 | 1.2553065287  |
| H21 | 0.1475634468  | -4.0802419696 | 0.6833016899  |
| C22 | -2.0511317656 | -2.7912837937 | 1.8481676706  |
| H23 | -2.4149370214 | -3.4656829532 | 1.0568906716  |
| H24 | -2.8021682007 | -2.0056102931 | 2.0258368857  |
| H25 | -1.9738759599 | -3.3877094455 | 2.7762758870  |
| C26 | -0.2551122558 | -1.2477977189 | 2.6954439208  |
| H27 | -0.8921818506 | -0.3481349221 | 2.7340361148  |
| H28 | 0.7991709087  | -0.9463550850 | 2.5885160494  |
| H29 | -0.3665841190 | -1.7821521942 | 3.6569136925  |
| C30 | 2.5400804922  | 2.8538247619  | 0.0315746344  |
| C31 | 3.4024787100  | 3.9692360735  | 0.0364350159  |
| H32 | 3.0374252584  | 4.9986872641  | 0.1107847093  |
| C33 | 4.7771285094  | 3.7380563097  | -0.0689229460 |
| C34 | 5.3303481648  | 2.4586115136  | -0.1809632865 |
| H35 | 6.4106852185  | 2.3106281199  | -0.2742309954 |
| C36 | 4.4353455894  | 1.3777453669  | -0.1768770694 |
| C37 | 3.0548996039  | 1.5270990171  | -0.0609655390 |
| F38 | 5.6189565383  | 4.8055513786  | -0.0717587940 |
| F39 | 4.9660087202  | 0.1298657526  | -0.3092510884 |
| C40 | 0.3990328088  | 1.6964732486  | 0.0371733823  |
| C41 | 1.0688720618  | 2.9277103888  | 0.1170324259  |
| C42 | 0.2960195083  | 4.1115442817  | 0.2962411736  |
| H43 | 0.7951678427  | 5.0827484361  | 0.3862676245  |
| C44 | -1.0862618958 | 4.0387467374  | 0.3562770813  |
| H45 | -1.6821101855 | 4.9503526904  | 0.4791424701  |
| C46 | -1.7697928862 | 2.7904209553  | 0.2533761263  |
| C47 | -3.1897313478 | 2.7044621443  | 0.2804787784  |
| H48 | -3.7777114819 | 3.6221605470  | 0.4055258465  |
| C49 | -3.8179645358 | 1.4826643673  | 0.1342014244  |
| H50 | -4.9137587203 | 1.4329183481  | 0.1331452675  |
| C51 | -3.0933379054 | 0.2575511069  | -0.0188950314 |
| C52 | -1.6891785619 | 0.2890925588  | 0.0015251358  |
| C53 | -1.0153522104 | 1.5672160085  | 0.0996060211  |
| C54 | -3.9387457832 | -0.9727532828 | -0.2432004360 |
| H55 | -3.3641238519 | -1.9038758709 | -0.2162354649 |
| H56 | -4.4403760145 | -0.9107223831 | -1.2272821394 |
| H57 | -4.7383234172 | -1.0443150567 | 0.5149820615  |
| H58 | 1.2413959038  | 0.5668405175  | -1.4593602196 |

### TS<sub>Pt-C8</sub>, gas phase

Total Gibbs free energy, G<sub>tot</sub> (H<sub>tot</sub> - T\*S): -1827.809325 hartrees

|     |               |               |               |
|-----|---------------|---------------|---------------|
| Pt1 | 0.3571679267  | -0.5964633776 | 1.9318272841  |
| P2  | 0.2608364263  | -0.5970728906 | -0.3508417162 |
| F3  | 0.7766893356  | -0.5514423516 | 3.9243384917  |
| F4  | 0.9211243115  | -2.4990282171 | 1.9937627397  |
| C5  | 1.9961212327  | -1.1573308646 | -1.0004064074 |
| C6  | 2.2040414059  | -0.8849758357 | -2.5018198571 |
| H7  | 3.2202187936  | -1.2253691868 | -2.7709509591 |
| H8  | 2.1465226557  | 0.1888809957  | -2.7383531651 |
| H9  | 1.4985758711  | -1.4327294676 | -3.1436897027 |
| C10 | 3.0394931156  | -0.3370728796 | -0.2073178216 |
| H11 | 2.9704394158  | -0.5249094201 | 0.8756839530  |
| H12 | 2.9406448409  | 0.7467309375  | -0.3774767720 |
| H13 | 4.0449396440  | -0.6426105158 | -0.5477465711 |
| C14 | 2.2107806086  | -2.6526761480 | -0.6816742348 |
| H15 | 3.2651778416  | -2.9006304207 | -0.8998253641 |
| H16 | 1.5880098084  | -3.3147026084 | -1.3032031672 |
| H17 | 2.0024384330  | -2.8614984018 | 0.3792153409  |
| C18 | -1.1943616791 | -1.6675906059 | -1.0507723575 |
| C19 | -1.4488882385 | -2.7363394257 | 0.0428039461  |
| H20 | -2.1692009742 | -3.4766193164 | -0.3486243196 |
| H21 | -1.8798015532 | -2.2738689985 | 0.9448006482  |
| H22 | -0.5351265011 | -3.2560736342 | 0.3677477051  |
| C23 | -0.9128224521 | -2.3845063295 | -2.3872021012 |
| H24 | -0.0509786936 | -3.0641542970 | -2.3329030471 |
| H25 | -0.7639140908 | -1.7003462989 | -3.2367856352 |
| H26 | -1.7982372686 | -2.9989256033 | -2.6291508463 |
| C27 | -2.4645443469 | -0.8072067160 | -1.1958145926 |
| H28 | -2.3677943525 | -0.0158745856 | -1.9553462846 |
| H29 | -2.7561198694 | -0.3450940710 | -0.2418696914 |
| H30 | -3.2931266363 | -1.4680475546 | -1.5083490548 |
| C31 | -1.1043088374 | 1.0391700390  | 2.2612888564  |
| C32 | -1.4790612593 | 0.9241132045  | 3.6308402026  |
| H33 | -0.7532116432 | 0.5451676821  | 4.3557398280  |
| C34 | -2.7914737728 | 1.1808536363  | 4.0087661355  |
| C35 | -3.7969594535 | 1.5662325934  | 3.1124293611  |
| H36 | -4.8182117159 | 1.7655396098  | 3.4383421844  |
| C37 | -3.4060355576 | 1.6774509106  | 1.7779989616  |
| C38 | -2.1071961006 | 1.4330068434  | 1.3350339671  |
| H39 | -1.8823279740 | 1.6259974922  | 0.2877344065  |
| F40 | -3.1254999923 | 1.0378766134  | 5.3118736981  |
| F41 | -4.3284897648 | 2.0528027630  | 0.8570193821  |
| C42 | 0.4869096950  | 1.4876024501  | 1.7978734960  |
| C43 | 1.1904678844  | 2.1532672659  | 2.8329129972  |
| H44 | 1.1912148189  | 1.6787023072  | 3.8179252008  |
| C45 | 1.8076906549  | 3.3941107784  | 2.6164096227  |
| H46 | 2.3173669052  | 3.8918831685  | 3.4468210841  |
| C47 | 1.7194762410  | 4.0146643893  | 1.3743695011  |



|     |               |              |               |
|-----|---------------|--------------|---------------|
| H48 | 2.1188063528  | 5.0223891312 | 1.2202820977  |
| C49 | 1.1348532813  | 3.3353824805 | 0.2679813065  |
| C50 | 1.0770794636  | 3.9265081089 | -1.0247331069 |
| H51 | 1.4499868769  | 4.9476200298 | -1.1569859048 |
| C52 | 0.5582084980  | 3.2250096665 | -2.0937693105 |
| H53 | 0.4893083543  | 3.7023154707 | -3.0772305397 |
| C54 | 0.1664889961  | 1.8588084670 | -1.9797781107 |
| C55 | 0.2440761426  | 1.2340274984 | -0.7212980513 |
| C56 | 0.6183385329  | 2.0047781746 | 0.4365711654  |
| C57 | -0.3232950283 | 1.1964153658 | -3.2443842767 |
| H58 | -0.3638902923 | 0.1048886223 | -3.1668917050 |
| H59 | 0.3188806322  | 1.4528321843 | -4.1033502674 |
| H60 | -1.3405442755 | 1.5530765132 | -3.4894367219 |

### TS<sub>Pt-C8</sub>, acetonitrile solution

Title: nphh\_u\_06H3F2\_Pf2\_pLd\_C8\_ar\_migration\_c\_c\_sigma\_TS\_MeCN

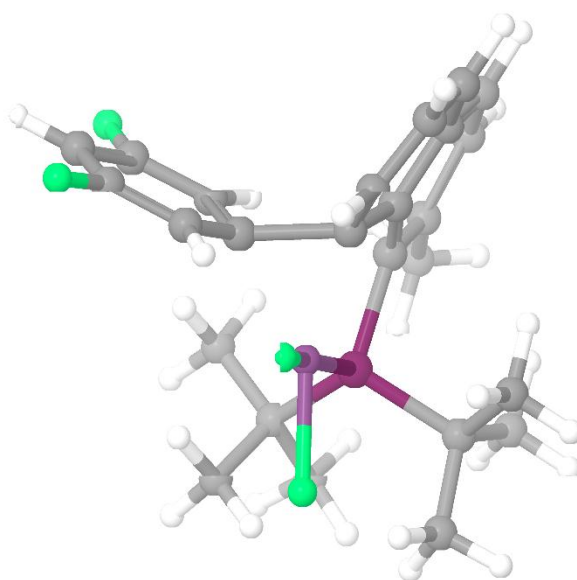

Total Gibbs free energy, G<sub>tot</sub> (H<sub>tot</sub> - T\*S): -1827.836675 hartrees

|     |              |               |               |
|-----|--------------|---------------|---------------|
| Pt1 | 0.3651718158 | -0.6057515706 | 1.9281263101  |
| P2  | 0.2634005173 | -0.5904599028 | -0.3739287007 |
| F3  | 0.8015753425 | -0.6276877471 | 3.9587763400  |
| F4  | 0.8683106117 | -2.5492375865 | 2.0298561612  |
| C5  | 2.0035856507 | -1.1643603018 | -1.0044559035 |
| C6  | 2.2180108119 | -0.9083977451 | -2.5091240474 |
| H7  | 3.2398701351 | -1.2467174174 | -2.7617271741 |
| H8  | 2.1587152496 | 0.1623470223  | -2.7595770697 |
| H9  | 1.5220069960 | -1.4684239390 | -3.1508051834 |
| C10 | 3.0456390830 | -0.3345716982 | -0.2193617366 |
| H11 | 2.9519972738 | -0.4856074568 | 0.8684053330  |
| H12 | 2.9608719048 | 0.7444206160  | -0.4236530537 |
| H13 | 4.0533282434 | -0.6619459694 | -0.5328120209 |
| C14 | 2.2111540420 | -2.6584011558 | -0.6724369460 |
| H15 | 3.2690615072 | -2.9072227308 | -0.8732748273 |
| H16 | 1.5965322339 | -3.3232329364 | -1.2993051962 |

|     |               |               |               |
|-----|---------------|---------------|---------------|
| H17 | 1.9884966924  | -2.8646425535 | 0.3855105655  |
| C18 | -1.1983255435 | -1.6638261235 | -1.0770178915 |
| C19 | -1.4686809997 | -2.7292489303 | 0.0138595474  |
| H20 | -2.2160854327 | -3.4450066530 | -0.3721032984 |
| H21 | -1.8735679163 | -2.2549407120 | 0.9222431105  |
| H22 | -0.5658905671 | -3.2812155792 | 0.3140888036  |
| C23 | -0.9009742953 | -2.3857623596 | -2.4096026252 |
| H24 | -0.0419593467 | -3.0691984956 | -2.3465221088 |
| H25 | -0.7470019853 | -1.7053632903 | -3.2615870091 |
| H26 | -1.7877242965 | -2.9995166389 | -2.6523084656 |
| C27 | -2.4685054648 | -0.8052435869 | -1.2421828704 |
| H28 | -2.3586197068 | -0.0056997756 | -1.9908184302 |
| H29 | -2.7905505005 | -0.3599445613 | -0.2899367206 |
| H30 | -3.2828965661 | -1.4692043040 | -1.5850778708 |
| C31 | -1.1024417794 | 0.9943519849  | 2.2743643774  |
| C32 | -1.4636857071 | 0.9308837275  | 3.6497206243  |
| H33 | -0.7402945596 | 0.5802046664  | 4.3891939050  |
| C34 | -2.7658093963 | 1.2384351359  | 4.0309652352  |
| C35 | -3.7745159718 | 1.6252240534  | 3.1390611516  |
| H36 | -4.7881260040 | 1.8667016420  | 3.4699673951  |
| C37 | -3.3891980826 | 1.6816850338  | 1.7989046829  |
| C38 | -2.1017826136 | 1.3864850525  | 1.3485243784  |
| H39 | -1.8845754642 | 1.5347461825  | 0.2922214115  |
| F40 | -3.0822300431 | 1.1481952877  | 5.3479769163  |
| F41 | -4.3098557755 | 2.0532547008  | 0.8727550141  |
| C42 | 0.5324012317  | 1.4710263991  | 1.7834468266  |
| C43 | 1.1980584355  | 2.1570469104  | 2.8286161039  |
| H44 | 1.1990700791  | 1.7015001835  | 3.8232467746  |
| C45 | 1.7776889659  | 3.4210064808  | 2.6228550344  |
| H46 | 2.2610507207  | 3.9352780264  | 3.4607650977  |
| C47 | 1.6800508836  | 4.0397259393  | 1.3789620068  |
| H48 | 2.0524981034  | 5.0603758545  | 1.2301738877  |
| C49 | 1.1135648400  | 3.3500582965  | 0.2676639800  |
| C50 | 1.0364789677  | 3.9556322137  | -1.0205762242 |
| H51 | 1.3877272293  | 4.9875928675  | -1.1443612682 |
| C52 | 0.5255434100  | 3.2529708957  | -2.0947389361 |
| H53 | 0.4438405158  | 3.7367063630  | -3.0756170175 |
| C54 | 0.1551211788  | 1.8762577037  | -1.9888452272 |
| C55 | 0.2499135030  | 1.2418927338  | -0.7329757683 |
| C56 | 0.6306300008  | 2.0042235620  | 0.4281815934  |
| C57 | -0.3221067956 | 1.2194329437  | -3.2611337766 |
| H58 | -0.3509529286 | 0.1261067873  | -3.1984720509 |
| H59 | 0.3222967857  | 1.4954706529  | -4.1133790323 |
| H60 | -1.3414802972 | 1.5716523158  | -3.5087257463 |

**TS<sub>σ-π</sub>, gas phase**

Total Gibbs free energy, Gtot (Htot - T\*S): -1827.808221 hartrees

|     |               |               |               |
|-----|---------------|---------------|---------------|
| Pt1 | 0.3348348806  | -0.8097850313 | 1.8935817423  |
| P2  | 0.2367982172  | -0.6242952100 | -0.3545561080 |
| F3  | 0.5064629201  | -0.8929575470 | 3.9239895201  |
| F4  | 0.6022338869  | -2.8049724077 | 1.8533429802  |
| C5  | 1.8922733576  | -1.3123231209 | -1.0789806661 |
| C6  | 2.1439360107  | -1.0034190627 | -2.5647127018 |
| H7  | 3.1031233135  | -1.4709328940 | -2.8526137618 |
| H8  | 2.2419549316  | 0.0770911646  | -2.7518371116 |
| H9  | 1.3710145934  | -1.4153907420 | -3.2302132186 |
| C10 | 3.0183019712  | -0.6596681283 | -0.2440787674 |
| H11 | 2.9065846788  | -0.8820882495 | 0.8295803706  |
| H12 | 3.0511780725  | 0.4350763374  | -0.3690287829 |
| H13 | 3.9855323903  | -1.0688746625 | -0.5874545146 |
| C14 | 1.9150925406  | -2.8366327050 | -0.8277480203 |
| H15 | 2.9376794069  | -3.2036770322 | -1.0300791330 |
| H16 | 1.2361333186  | -3.3823635994 | -1.5021511160 |
| H17 | 1.6438119905  | -3.0721221538 | 0.2159429419  |
| C18 | -1.3476688456 | -1.4235657250 | -1.1132999865 |
| C19 | -1.7762528759 | -2.5056527724 | -0.0896297325 |
| H20 | -2.5849838620 | -3.1144786345 | -0.5322116924 |
| H21 | -2.1555917982 | -2.0359212213 | 0.8320884699  |
| H22 | -0.9494129664 | -3.1616721434 | 0.2237088751  |
| C23 | -1.1716417294 | -2.0815889551 | -2.4956027837 |
| H24 | -0.4373467873 | -2.9000654919 | -2.4849680393 |
| H25 | -0.8915278127 | -1.3735246427 | -3.2914869056 |
| H26 | -2.1433895639 | -2.5176049798 | -2.7890007714 |
| C27 | -2.4505469750 | -0.3501525216 | -1.1896767438 |
| H28 | -2.2453268070 | 0.4225079836  | -1.9477238763 |
| H29 | -2.6011378849 | 0.1473550566  | -0.2194043751 |
| H30 | -3.4009846580 | -0.8429929885 | -1.4640768527 |
| C31 | -1.1869539451 | 1.2975405527  | 2.2379818887  |
| C32 | -1.7233932562 | 0.7643641357  | 3.4373318973  |
| H33 | -1.0928883544 | 0.1528944663  | 4.0961961533  |
| C34 | -3.0762514330 | 0.9470888308  | 3.7137796198  |
| C35 | -3.9511761033 | 1.6467102559  | 2.8735452590  |
| H36 | -5.0054713461 | 1.7790704913  | 3.1189272241  |
| C37 | -3.3907317505 | 2.1700518807  | 1.7087767652  |
| C38 | -2.0438250393 | 2.0167587302  | 1.3716640759  |
| H39 | -1.6793893075 | 2.4979808863  | 0.4641144853  |
| F40 | -3.5798435497 | 0.4128134375  | 4.8492731079  |
| F41 | -4.1802998179 | 2.8813916247  | 0.8676028249  |
| C42 | 0.3445180042  | 1.3339658590  | 1.9461855845  |
| C43 | 1.1370405410  | 1.7475425094  | 3.0706126051  |
| H44 | 0.9312411553  | 1.2480369462  | 4.0225827351  |
| C45 | 2.0905136475  | 2.7664996912  | 2.9716718228  |
| H46 | 2.6720237095  | 3.0557099056  | 3.8515861277  |
| C47 | 2.2066902579  | 3.4855326882  | 1.7818505731  |

|     |               |              |               |
|-----|---------------|--------------|---------------|
| H48 | 2.8422451721  | 4.3766954251 | 1.7332430441  |
| C49 | 1.5486969777  | 3.0562843830 | 0.5922887600  |
| C50 | 1.7320573457  | 3.7211901359 | -0.6515091815 |
| H51 | 2.3315047390  | 4.6368801621 | -0.6846431313 |
| C52 | 1.1631040234  | 3.2071589448 | -1.8007505879 |
| H53 | 1.2673044456  | 3.7458216792 | -2.7486127172 |
| C54 | 0.5180760242  | 1.9362842137 | -1.8129917735 |
| C55 | 0.3864285647  | 1.2263217998 | -0.6012627711 |
| C56 | 0.7506408500  | 1.8682889017 | 0.6265105614  |
| C57 | -0.0099990350 | 1.4573725603 | -3.1421525304 |
| H58 | -0.2211871433 | 0.3827601136 | -3.1551197789 |
| H59 | 0.6915306110  | 1.6827037868 | -3.9617860286 |
| H60 | -0.9539748096 | 1.9839368892 | -3.3742732726 |

### TS<sub>σ-π</sub>, acetonitrile solution

Title: nphh\_8\_C043FZ\_Pf2\_c\_c\_egme\_complex

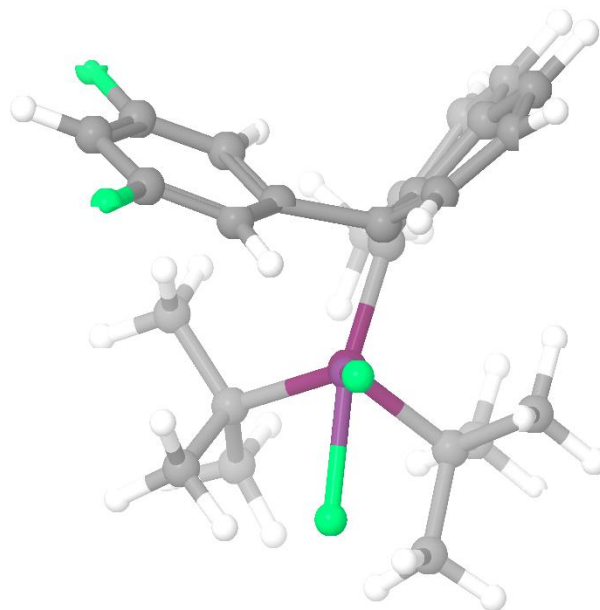

Total Gibbs free energy, Gtot (Htot - T\*S): -1827.839456 hartrees

|     |              |               |               |
|-----|--------------|---------------|---------------|
| Pt1 | 0.3547510884 | -0.7924296249 | 1.9099744899  |
| P2  | 0.2787573229 | -0.5770884761 | -0.3572435456 |
| F3  | 0.6083545918 | -0.9497372852 | 3.9703316878  |
| F4  | 0.5620906984 | -2.8196748899 | 1.9222694979  |
| C5  | 1.9404783836 | -1.2881089131 | -1.0507678605 |
| C6  | 2.2067607066 | -0.9965354342 | -2.5394892242 |
| H7  | 3.1764353036 | -1.4586499105 | -2.8029319345 |
| H8  | 2.2988449723 | 0.0820457801  | -2.7411268756 |
| H9  | 1.4489041366 | -1.4259837114 | -3.2113566979 |
| C10 | 3.0632951062 | -0.6287196913 | -0.2173244606 |
| H11 | 2.9196772116 | -0.8071614427 | 0.8612361381  |
| H12 | 3.1194222136 | 0.4597254970  | -0.3806059710 |
| H13 | 4.0295363440 | -1.0675266984 | -0.5251429306 |
| C14 | 1.9514936018 | -2.8112352827 | -0.7873199447 |
| H15 | 2.9758498711 | -3.1837154664 | -0.9719685120 |
| H16 | 1.2795790603 | -3.3595216859 | -1.4672365945 |

|     |               |               |               |
|-----|---------------|---------------|---------------|
| H17 | 1.6636563617  | -3.0412878582 | 0.2520817254  |
| C18 | -1.3038453255 | -1.3645924457 | -1.1568305928 |
| C19 | -1.7794592506 | -2.4255138160 | -0.1340246439 |
| H20 | -2.6134692882 | -2.9988316228 | -0.5771512052 |
| H21 | -2.1376197758 | -1.9336858107 | 0.7853511441  |
| H22 | -0.9815004221 | -3.1201534910 | 0.1700647498  |
| C23 | -1.0925424164 | -2.0477805925 | -2.5240277023 |
| H24 | -0.3689121440 | -2.8752634601 | -2.4826422321 |
| H25 | -0.7877885759 | -1.3551526340 | -3.3244244933 |
| H26 | -2.0631799226 | -2.4785858717 | -2.8315517366 |
| C27 | -2.3998761499 | -0.2889878767 | -1.2914158174 |
| H28 | -2.1601375276 | 0.4766626481  | -2.0452460182 |
| H29 | -2.6011815753 | 0.2122334088  | -0.3329824360 |
| H30 | -3.3338581172 | -0.7873612253 | -1.6101080027 |
| C31 | -1.0941051018 | 1.2614523964  | 2.2835620815  |
| C32 | -1.5965896482 | 0.8258611543  | 3.5397989026  |
| H33 | -0.9464054129 | 0.2865228042  | 4.2368899029  |
| C34 | -2.9482216412 | 0.9948883643  | 3.8308518700  |
| C35 | -3.8692323767 | 1.5946226536  | 2.9621731849  |
| H36 | -4.9242966136 | 1.7176875569  | 3.2208575239  |
| C37 | -3.3405818721 | 2.0273511625  | 1.7461234269  |
| C38 | -1.9968665993 | 1.8863293734  | 1.3904273412  |
| H39 | -1.6695344080 | 2.3082828180  | 0.4407794473  |
| F40 | -3.4048317829 | 0.5418061665  | 5.0265381405  |
| F41 | -4.1666227269 | 2.6355776614  | 0.8570840531  |
| C42 | 0.4480365769  | 1.3387656499  | 1.9739463131  |
| C43 | 1.2119016583  | 1.8111371133  | 3.1049808373  |
| H44 | 1.0336670938  | 1.3272028560  | 4.0705243959  |
| C45 | 2.0896647507  | 2.8934245837  | 3.0128042600  |
| H46 | 2.6355259300  | 3.2329407629  | 3.8994109593  |
| C47 | 2.1780303476  | 3.6085999022  | 1.8132532690  |
| H48 | 2.7592850072  | 4.5380280278  | 1.7658384633  |
| C49 | 1.5527132521  | 3.1359350611  | 0.6239206467  |
| C50 | 1.7086216165  | 3.8217231380  | -0.6156702918 |
| H51 | 2.2653270572  | 4.7664132150  | -0.6379577108 |
| C52 | 1.1672575082  | 3.2919483257  | -1.7718335774 |
| H53 | 1.2536535835  | 3.8397722751  | -2.7176568808 |
| C54 | 0.5648931720  | 1.9974619039  | -1.7918955513 |
| C55 | 0.4537666786  | 1.2735157185  | -0.5805322943 |
| C56 | 0.8151602772  | 1.9056048658  | 0.6521558190  |
| C57 | 0.0686930386  | 1.5166288030  | -3.1329677110 |
| H58 | -0.1207167251 | 0.4378958980  | -3.1657639979 |
| H59 | 0.7836435490  | 1.7668865551  | -3.9350870693 |
| H60 | -0.8782274405 | 2.0333907838  | -3.3817688873 |

**TS<sub>C8-c7</sub> (Ar = 3,5-difluorophenyl), gas phase**

Total Gibbs free energy, G<sub>tot</sub> (H<sub>tot</sub> - T\*S): -1827.795683 hartrees

|     |               |               |               |
|-----|---------------|---------------|---------------|
| Pt1 | 7.9264768571  | 8.7178641207  | 4.1633781746  |
| P2  | 7.9434586586  | 8.0126886549  | 2.0466453476  |
| F3  | 8.0486268742  | 9.4690320190  | 6.0774584191  |
| F4  | 6.6961363393  | 7.2491352544  | 4.8411309835  |
| C5  | 8.6151228456  | 6.2103181629  | 1.9905422845  |
| C6  | 8.9442255118  | 5.6438581443  | 0.5987119513  |
| H7  | 9.2842566869  | 4.6000548624  | 0.7270282550  |
| H8  | 9.7642052050  | 6.1923600549  | 0.1090823809  |
| H9  | 8.0744680444  | 5.6187465436  | -0.0753449150 |
| C10 | 9.9137750469  | 6.2345014369  | 2.8305234688  |
| H11 | 9.7207842232  | 6.5844623414  | 3.8574078793  |
| H12 | 10.6859016733 | 6.8826866336  | 2.3826131965  |
| H13 | 10.3192540292 | 5.2074820794  | 2.8768226544  |
| C14 | 7.5702613161  | 5.3241946405  | 2.7054771530  |
| H15 | 8.0321631758  | 4.3416789227  | 2.9130190680  |
| H16 | 6.6852758943  | 5.1403170522  | 2.0739733072  |
| H17 | 7.2381446506  | 5.7806050865  | 3.6570280126  |
| C18 | 6.2366364048  | 8.2807696328  | 1.1963336502  |
| C19 | 5.1967376229  | 8.2295795519  | 2.3456862462  |
| H20 | 4.1826874706  | 8.1889562984  | 1.9086167764  |
| H21 | 5.2744856854  | 9.1317629319  | 2.9731356582  |
| H22 | 5.3416188260  | 7.3806945786  | 3.0323906115  |
| C23 | 5.8427928555  | 7.2505901838  | 0.1213902406  |
| H24 | 5.7812941788  | 6.2294000419  | 0.5268182455  |
| H25 | 6.5143149421  | 7.2393890947  | -0.7511553945 |
| H26 | 4.8380750301  | 7.5130615613  | -0.2559712182 |
| C27 | 6.2429241215  | 9.7026520185  | 0.5982285714  |
| H28 | 6.8914413927  | 9.7903696324  | -0.2881792271 |
| H29 | 6.5677516536  | 10.4512415538 | 1.3404176858  |
| H30 | 5.2142924208  | 9.9634406128  | 0.2908531328  |
| C42 | 8.4844301720  | 11.6037413816 | 3.6846945515  |
| C43 | 7.5307713305  | 11.8498607270 | 4.6981584924  |
| H44 | 7.4207761135  | 11.1208417493 | 5.5190268069  |
| C45 | 6.7569970574  | 13.0031461304 | 4.6064420766  |
| C46 | 6.8823523989  | 13.9300952954 | 3.5643001573  |
| H47 | 6.2549027276  | 14.8211748236 | 3.5111052064  |
| C48 | 7.8508097122  | 13.6574324157 | 2.5955431124  |
| C49 | 8.6740011073  | 12.5314628541 | 2.6374661775  |
| H50 | 9.4112193768  | 12.3914278431 | 1.8474898836  |
| F51 | 5.8381497655  | 13.2462184357 | 5.5652744891  |
| F52 | 8.0037228609  | 14.5263839062 | 1.5696206879  |
| C53 | 9.2644229032  | 10.0992059442 | 3.5948220654  |
| C54 | 10.0459649341 | 10.8154958711 | 4.5858409600  |
| H55 | 9.6494764645  | 10.7580836423 | 5.6065000835  |
| C56 | 11.3187882379 | 11.3902313217 | 4.2953272968  |
| H57 | 11.8656245672 | 11.9147349170 | 5.0838161868  |
| C58 | 11.8455957427 | 11.2643676870 | 3.0305870568  |

|     |               |               |               |
|-----|---------------|---------------|---------------|
| H59 | 12.8210118259 | 11.7038480362 | 2.7918064694  |
| C60 | 11.1608935969 | 10.5416005643 | 1.9880772486  |
| C61 | 11.7168953694 | 10.4265846472 | 0.6902506840  |
| H62 | 12.6781395183 | 10.9030741348 | 0.4702438309  |
| C63 | 11.0279378664 | 9.7384004312  | -0.2952253177 |
| H64 | 11.4357771648 | 9.6928043783  | -1.3109600315 |
| C65 | 9.8073420446  | 9.0633060261  | -0.0291098008 |
| C66 | 9.2842354141  | 9.0883526976  | 1.2850194164  |
| C67 | 9.9133095623  | 9.9064293090  | 2.2639950107  |
| C68 | 9.1302771140  | 8.4129756850  | -1.2102899915 |
| H69 | 8.3118120313  | 7.7464417600  | -0.9214233665 |
| H70 | 9.8475772040  | 7.8355643328  | -1.8169577756 |
| H71 | 8.7103757307  | 9.1933907458  | -1.8705721441 |

### TS<sub>C8-C7</sub> (Ar = 3,5-difluorophenyl), acetonitrile solution

TIN: P/F2\_rpf/h/ORH/F2\_C8\_Iu\_C7\_ury\_mrg/atom\_TS\_MvCN - TS G0603

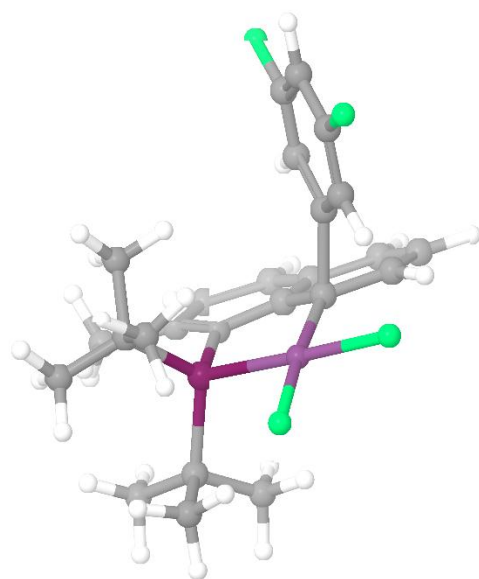

Total Gibbs free energy, G<sub>tot</sub> (H<sub>tot</sub> - T\*S): -1827.831917 hartrees

|     |               |              |               |
|-----|---------------|--------------|---------------|
| Pt1 | 7.9474114989  | 8.7019700819 | 4.1888276845  |
| P2  | 7.9503003643  | 8.0255996925 | 2.0395158643  |
| F3  | 8.0443887983  | 9.4122290452 | 6.1546642051  |
| F4  | 6.6789342525  | 7.2492762921 | 4.9460671730  |
| C5  | 8.5987071287  | 6.2126864646 | 1.9633250794  |
| C6  | 8.8901363485  | 5.6428485304 | 0.5628400333  |
| H7  | 9.2252599627  | 4.5966948745 | 0.6898480327  |
| H8  | 9.7055334640  | 6.1819106909 | 0.0564689173  |
| H9  | 8.0077528745  | 5.6239659652 | -0.0942602393 |
| C10 | 9.9193719604  | 6.2237155578 | 2.7666427502  |
| H11 | 9.7570423727  | 6.6104464345 | 3.7864485303  |
| H12 | 10.6910339962 | 6.8450541475 | 2.2823960169  |
| H13 | 10.3055706154 | 5.1905883485 | 2.8295160701  |
| C14 | 7.5601795889  | 5.3342387633 | 2.6980284159  |
| H15 | 8.0183659130  | 4.3480996259 | 2.8980582551  |
| H16 | 6.6627872872  | 5.1576425468 | 2.0820607789  |

|     |               |               |               |
|-----|---------------|---------------|---------------|
| H17 | 7.2461462980  | 5.7912201688  | 3.6540592159  |
| C18 | 6.2389076645  | 8.3129612837  | 1.1939566885  |
| C19 | 5.2003163130  | 8.2827981873  | 2.3426684407  |
| H20 | 4.1850176431  | 8.3086884152  | 1.9070399424  |
| H21 | 5.3308080263  | 9.1612426200  | 2.9957205596  |
| H22 | 5.2981817615  | 7.3974794743  | 2.9901840243  |
| C23 | 5.8276535945  | 7.2781681303  | 0.1274068178  |
| H24 | 5.7465997494  | 6.2602431528  | 0.5389975959  |
| H25 | 6.4963081501  | 7.2492448918  | -0.7468473473 |
| H26 | 4.8267496008  | 7.5589552268  | -0.2485005875 |
| C27 | 6.2570897301  | 9.7293304656  | 0.5808175646  |
| H28 | 6.9058272762  | 9.7988038592  | -0.3066215380 |
| H29 | 6.5886439986  | 10.4858351084 | 1.3122978714  |
| H30 | 5.2299626896  | 9.9925590273  | 0.2684400070  |
| C42 | 8.5088493144  | 11.6273433916 | 3.6764014260  |
| C43 | 7.5097522966  | 11.8410596588 | 4.6550181465  |
| H44 | 7.3972802426  | 11.1190654029 | 5.4765690075  |
| C45 | 6.7004881451  | 12.9683648195 | 4.5388728021  |
| C46 | 6.8268700023  | 13.9014077799 | 3.5035754061  |
| H47 | 6.1703419552  | 14.7725893583 | 3.4279805886  |
| C48 | 7.8424108143  | 13.6613530474 | 2.5709794125  |
| C49 | 8.6993245466  | 12.5630993273 | 2.6364559341  |
| H50 | 9.4739706495  | 12.4544614264 | 1.8756422550  |
| F51 | 5.7414536620  | 13.1718645582 | 5.4722959398  |
| F52 | 8.0037331317  | 14.5384092142 | 1.5535538963  |
| C53 | 9.2724121247  | 10.0976049033 | 3.5972924413  |
| C54 | 10.0368893210 | 10.8642451849 | 4.5711353314  |
| H55 | 9.6683258374  | 10.8476726279 | 5.6025792370  |
| C56 | 11.3087241298 | 11.4481253125 | 4.2731059616  |
| H57 | 11.8386643733 | 12.0013434308 | 5.0549000530  |
| C58 | 11.8484198486 | 11.2926858278 | 3.0164049919  |
| H59 | 12.8255513326 | 11.7300893647 | 2.7756611309  |
| C60 | 11.1646900376 | 10.5540237826 | 1.9829587615  |
| C61 | 11.7163379043 | 10.4455706298 | 0.6806243841  |
| H62 | 12.6742421351 | 10.9300620590 | 0.4567096702  |
| C63 | 11.0239771121 | 9.7599724393  | -0.3053910926 |
| H64 | 11.4268003769 | 9.7214087943  | -1.3249887544 |
| C65 | 9.8040604306  | 9.0794541215  | -0.0381016404 |
| C66 | 9.2912588157  | 9.0945937380  | 1.2831186981  |
| C67 | 9.9220542124  | 9.9074474793  | 2.2651725689  |
| C68 | 9.1354901003  | 8.4336753010  | -1.2272494169 |
| H69 | 8.2865655334  | 7.7966623463  | -0.9573800112 |
| H70 | 9.8534981588  | 7.8276485838  | -1.8072415590 |
| H71 | 8.7642390374  | 9.2212788475  | -1.9109246815 |



**TS<sub>C8-c7</sub> (Ar = 4-methoxyphenyl), gas phase**

Total Gibbs free energy, G<sub>tot</sub> (H<sub>tot</sub> - T\*S): -1743.853758 hartrees

|     |               |               |               |
|-----|---------------|---------------|---------------|
| Pt1 | -0.3250472185 | -0.4036042256 | 2.1383071324  |
| P2  | -0.3841592146 | -1.0864014014 | 0.0206005809  |
| F3  | -0.1624611963 | 0.3584381119  | 4.0416274544  |
| F4  | -1.5764368509 | -1.8606049364 | 2.8379266270  |
| C5  | 0.2297439475  | -2.9090620164 | -0.0763195706 |
| C6  | 0.5060577712  | -3.4738061210 | -1.4800245305 |
| H7  | 0.8134247883  | -4.5298403503 | -1.3690938580 |
| H8  | 1.3323907777  | -2.9489234484 | -1.9847408735 |
| H9  | -0.3796979209 | -3.4630039030 | -2.1333486472 |
| C10 | 1.5487401993  | -2.9322169346 | 0.7308078470  |
| H11 | 1.3911025265  | -2.5819318410 | 1.7637381144  |
| H12 | 2.3293546466  | -2.3047346826 | 0.2682012571  |
| H13 | 1.9229939782  | -3.9717987927 | 0.7611828565  |
| C14 | -0.8228657093 | -3.7684512525 | 0.6597834799  |
| H15 | -0.3853316882 | -4.7653531123 | 0.8516003779  |
| H16 | -1.7280641914 | -3.9229943166 | 0.0493096580  |
| H17 | -1.1175235366 | -3.3064394329 | 1.6218111618  |
| C18 | -2.1006187539 | -0.7593296845 | -0.7903804641 |
| C19 | -3.1110854239 | -0.7675634367 | 0.3859458677  |
| H20 | -4.1378581133 | -0.7781686143 | -0.0229660107 |
| H21 | -2.9850469296 | 0.1366864695  | 1.0027292660  |
| H22 | -2.9731900759 | -1.6149453051 | 1.0767314596  |
| C23 | -2.5578862153 | -1.7783805084 | -1.8505462981 |
| H24 | -2.6490314252 | -2.7947694415 | -1.4389343316 |
| H25 | -1.9055933356 | -1.8198748722 | -2.7370403875 |
| H26 | -3.5595451373 | -1.4793590825 | -2.2087909052 |
| C27 | -2.0601905894 | 0.6581130227  | -1.3985911607 |
| H28 | -1.4320668452 | 0.7164285079  | -2.3022596524 |
| H29 | -1.6903791903 | 1.4010520068  | -0.6721519520 |
| H30 | -3.0865295136 | 0.9527033977  | -1.6835804411 |
| C42 | 0.2255239909  | 2.4299034338  | 1.5249038640  |
| C43 | -0.6675106353 | 2.7653895223  | 2.5681842250  |
| H44 | -0.7728205434 | 2.0548366983  | 3.4027222378  |
| C45 | -1.3987432935 | 3.9540109789  | 2.5311888103  |
| C46 | -1.2387934845 | 4.8481855170  | 1.4533087458  |
| O47 | -1.9111208644 | 6.0266951670  | 1.3057171527  |
| C48 | -0.3211152280 | 4.5396087720  | 0.4287552806  |
| C49 | 0.4206895640  | 3.3601984195  | 0.4763818223  |
| H50 | 1.1182012241  | 3.1479557642  | -0.3364626501 |
| H51 | -2.0918411000 | 4.1706583712  | 3.3472573892  |
| H52 | -0.2128133794 | 5.2384938154  | -0.4055759231 |
| C53 | 1.0113579459  | 1.0052390639  | 1.5248235854  |
| C54 | 1.8886117749  | 1.5861100852  | 2.5326453511  |
| H55 | 1.4648148323  | 1.5997402551  | 3.5442436057  |
| C56 | 3.1921270215  | 2.0492752748  | 2.2454971405  |
| H57 | 3.7971004865  | 2.5072496909  | 3.0331848416  |
| C58 | 3.6845234177  | 1.9244609272  | 0.9584401823  |

|     |               |               |               |
|-----|---------------|---------------|---------------|
| H59 | 4.6835822038  | 2.3041679632  | 0.7127555011  |
| C60 | 2.9377959222  | 1.2802136756  | -0.0849103778 |
| C61 | 3.4710615318  | 1.1409595283  | -1.3917020137 |
| H62 | 4.4627665492  | 1.5484600804  | -1.6162834738 |
| C63 | 2.7268178315  | 0.5118420739  | -2.3747076914 |
| H64 | 3.1177218920  | 0.4474467974  | -3.3960135717 |
| C65 | 1.4713062220  | -0.0919149582 | -2.0931178270 |
| C66 | 0.9688138047  | -0.0494271781 | -0.7713897928 |
| C67 | 1.6503561876  | 0.7323135198  | 0.2014139445  |
| C68 | 0.7437878699  | -0.6997034337 | -3.2668976824 |
| H69 | -0.1091778093 | -1.3175555200 | -2.9688391175 |
| H70 | 1.4192733377  | -1.3163891998 | -3.8831861747 |
| H71 | 0.3629080839  | 0.1058181549  | -3.9213173522 |
| C72 | -2.8604338136 | 6.3765892373  | 2.3137911597  |
| H73 | -3.2907902716 | 7.3373797938  | 1.9983141048  |
| H74 | -3.6649394567 | 5.6227753091  | 2.3934512622  |
| H75 | -2.3794017099 | 6.4979958661  | 3.3016342156  |

### TS<sub>C8-C7</sub> (Ar = 4-methoxyphenyl), acetonitrile solution

Title: Pff2\_nphn\_C8H4OMe\_migration\_TS\_MeCN

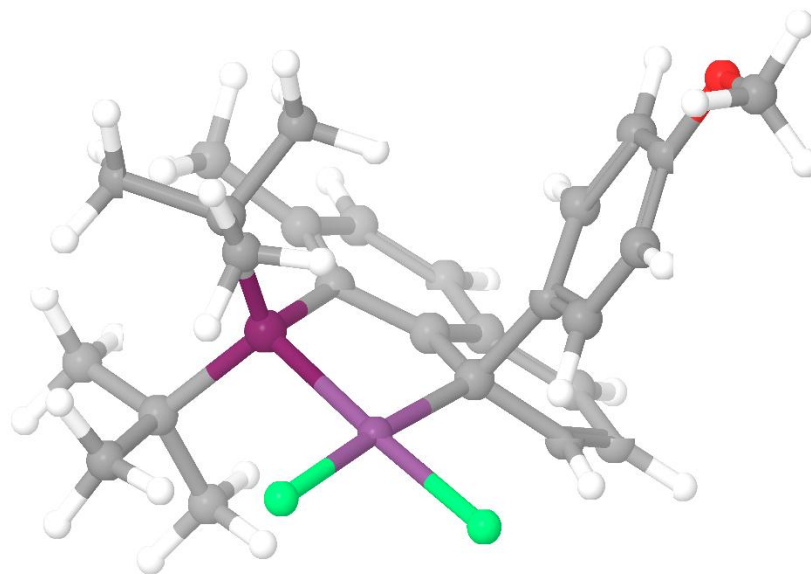

Total Gibbs free energy, G<sub>tot</sub> (H<sub>tot</sub> - T\*S): -1743.892514 hartrees

|     |               |               |               |
|-----|---------------|---------------|---------------|
| Pt1 | -0.3035355130 | -0.4300503019 | 2.1562919678  |
| P2  | -0.3731746098 | -1.0799859354 | 0.0067463901  |
| F3  | -0.1528035920 | 0.2752477459  | 4.1183390800  |
| F4  | -1.5853724253 | -1.8747485168 | 2.9590379680  |
| C5  | 0.2061664086  | -2.9148497862 | -0.1033139241 |
| C6  | 0.4342565460  | -3.4981036814 | -1.5099853824 |
| H7  | 0.7255392166  | -4.5585575774 | -1.3907794959 |
| H8  | 1.2587401310  | -2.9968560108 | -2.0400255823 |
| H9  | -0.4656701312 | -3.4779916705 | -2.1432387071 |
| C10 | 1.5494168085  | -2.9565539770 | 0.6612166443  |
| H11 | 1.4323413630  | -2.5503112810 | 1.6795538292  |

|     |               |               |               |
|-----|---------------|---------------|---------------|
| H12 | 2.3330200467  | -2.3740443122 | 0.1485690334  |
| H13 | 1.8921169762  | -4.0051706694 | 0.7244635844  |
| C14 | -0.8444530969 | -3.7538830995 | 0.6602017201  |
| H15 | -0.4221100918 | -4.7596705773 | 0.8426433915  |
| H16 | -1.7662754797 | -3.8898657477 | 0.0697771314  |
| H17 | -1.1123045481 | -3.2880109548 | 1.6269067232  |
| C18 | -2.0883244963 | -0.7242040400 | -0.8074777337 |
| C19 | -3.1016227072 | -0.7061361316 | 0.3632117286  |
| H20 | -4.1245699774 | -0.6328863760 | -0.0481633947 |
| H21 | -2.9129542002 | 0.1643270133  | 1.0128560255  |
| H22 | -3.0280510235 | -1.5954612461 | 1.0088911756  |
| C23 | -2.5644465388 | -1.7417664733 | -1.8630442577 |
| H24 | -2.6798512050 | -2.7553000772 | -1.4485758658 |
| H25 | -1.9132599881 | -1.7992320869 | -2.7491796480 |
| H26 | -3.5595696572 | -1.4197142367 | -2.2216563966 |
| C27 | -2.0237680099 | 0.6875696013  | -1.4278135820 |
| H28 | -1.3894857203 | 0.7252832347  | -2.3276658437 |
| H29 | -1.6461764131 | 1.4326567249  | -0.7076387706 |
| H30 | -3.0445984972 | 0.9924071693  | -1.7233990064 |
| C42 | 0.2362112773  | 2.4523690946  | 1.5087062007  |
| C43 | -0.6766861278 | 2.7721609902  | 2.5467198799  |
| H44 | -0.7815244452 | 2.0597641083  | 3.3763850453  |
| C45 | -1.4250937925 | 3.9500944047  | 2.5203165157  |
| C46 | -1.2660801431 | 4.8556149544  | 1.4483077050  |
| O47 | -1.9491870716 | 6.0230553087  | 1.3074047945  |
| C48 | -0.3371599342 | 4.5644759446  | 0.4205950241  |
| C49 | 0.4178309459  | 3.3957998084  | 0.4625468860  |
| H50 | 1.1198830219  | 3.2026260072  | -0.3524361901 |
| H51 | -2.1265946236 | 4.1540700628  | 3.3339120788  |
| H52 | -0.2308214725 | 5.2687747744  | -0.4121721220 |
| C53 | 0.9896866366  | 1.0182399764  | 1.5098787872  |
| C54 | 1.8514595721  | 1.6729086556  | 2.5009424369  |
| H55 | 1.4635637557  | 1.7097221561  | 3.5243738278  |
| C56 | 3.1465413193  | 2.1660392887  | 2.2024834766  |
| H57 | 3.7293805781  | 2.6683637369  | 2.9814278554  |
| C58 | 3.6602131896  | 1.9983787403  | 0.9289905307  |
| H59 | 4.6606947341  | 2.3786821149  | 0.6836933958  |
| C60 | 2.9279514402  | 1.3126569095  | -0.1010616948 |
| C61 | 3.4773733598  | 1.1562646357  | -1.4009929560 |
| H62 | 4.4659804027  | 1.5754493255  | -1.6247304616 |
| C63 | 2.7479209411  | 0.5025751114  | -2.3816550140 |
| H64 | 3.1475728666  | 0.4291418173  | -3.4005736441 |
| C65 | 1.4921101613  | -0.1041869923 | -2.1044353602 |
| C66 | 0.9844926117  | -0.0535699918 | -0.7796919058 |
| C67 | 1.6487786176  | 0.7433087596  | 0.1893005292  |
| C68 | 0.7783789895  | -0.7155963169 | -3.2850766511 |
| H69 | -0.0925681988 | -1.3173694703 | -3.0049912370 |
| H70 | 1.4604267129  | -1.3466710509 | -3.8810604531 |
| H71 | 0.4299042887  | 0.0916476341  | -3.9571296045 |
| C72 | -2.8973576144 | 6.3857251470  | 2.3314203109  |

|     |               |              |              |
|-----|---------------|--------------|--------------|
| H73 | -3.3172046135 | 7.3514664488 | 2.0153678911 |
| H74 | -3.7057687017 | 5.6375069812 | 2.4090670149 |
| H75 | -2.4009663612 | 6.5005477675 | 3.3110477795 |

### TS<sub>CHF</sub>, gas phase

Total Gibbs free energy, G<sub>tot</sub> (H<sub>tot</sub> - T\*S): -1827.834699 hartrees

|     |               |               |               |
|-----|---------------|---------------|---------------|
| Pt1 | 1.7367543420  | 0.5857221749  | -0.9368471399 |
| P2  | -0.1399553633 | -0.5991307583 | -0.6851869401 |
| F3  | 3.0949736876  | 2.2190111965  | -1.5144934587 |
| F4  | 2.9813945568  | -0.8163116499 | -1.6901600754 |
| C5  | -0.4386449284 | -1.5448455802 | -2.3254373086 |
| C6  | -1.8196950553 | -2.2082359841 | -2.4722187309 |
| H7  | -1.8254440405 | -2.7577005766 | -3.4306456142 |
| H8  | -2.6331434361 | -1.4685999727 | -2.5175578907 |
| H9  | -2.0396917907 | -2.9393952129 | -1.6796576837 |
| C10 | -0.2818979295 | -0.4895192227 | -3.4450596325 |
| H11 | 0.7243618487  | -0.0420870125 | -3.4438050936 |
| H12 | -1.0241069465 | 0.3212618785  | -3.3550370748 |
| H13 | -0.4401541859 | -0.9895459648 | -4.4173154980 |
| C14 | 0.6853400927  | -2.5965586186 | -2.4497687033 |
| H15 | 0.6466749631  | -3.0209388480 | -3.4692408694 |
| H16 | 0.5488764797  | -3.4333407258 | -1.7445423751 |
| H17 | 1.6801653243  | -2.1385866916 | -2.2922745011 |
| C18 | -0.0850473260 | -1.6827506221 | 0.8988033896  |
| C19 | 1.3956790208  | -2.0941118200 | 1.0830484176  |
| H20 | 1.4683520014  | -2.7710688402 | 1.9534156274  |
| H21 | 2.0278274370  | -1.2115971390 | 1.2697022386  |
| H22 | 1.8133785649  | -2.6076310722 | 0.2037995830  |
| C23 | -0.9632322688 | -2.9473745126 | 0.8651951083  |
| H24 | -0.6703129230 | -3.6396531397 | 0.0609823648  |
| H25 | -2.0376284549 | -2.7277967920 | 0.7690076281  |
| H26 | -0.8312052860 | -3.4841056755 | 1.8217216512  |
| C27 | -0.5037957460 | -0.7726478750 | 2.0713819633  |
| H28 | -1.5719898517 | -0.5050158121 | 2.0331449236  |
| H29 | 0.0867281788  | 0.1585565031  | 2.0925708198  |
| H30 | -0.3192520374 | -1.3079766837 | 3.0195097925  |
| C31 | 2.2665210324  | 3.3834739491  | 1.1666726567  |
| C32 | 3.6064414035  | 2.9549602277  | 1.1782451564  |
| H33 | 4.0772071602  | 2.5738417280  | 0.2706007953  |
| C34 | 4.3262316332  | 3.0274760830  | 2.3731808735  |
| C35 | 3.7828092669  | 3.5146569172  | 3.5646073805  |
| H36 | 4.3692573405  | 3.5648650228  | 4.4832636865  |
| C37 | 2.4518897792  | 3.9331925961  | 3.5193246670  |
| C38 | 1.6852708589  | 3.8786464273  | 2.3537458399  |
| H39 | 0.6450504974  | 4.2110953349  | 2.3785121617  |
| F40 | 5.6153188219  | 2.6168782872  | 2.3803102951  |
| F41 | 1.8808046278  | 4.4063451232  | 4.6535991093  |
| C42 | 0.6835520805  | 2.0886572547  | -0.3845042432 |
| C43 | 1.3691101995  | 3.3490202173  | -0.0778390942 |

|     |               |               |               |
|-----|---------------|---------------|---------------|
| C44 | 0.5693570469  | 4.5684077929  | -0.2421500937 |
| H45 | 1.0758160130  | 5.5273352939  | -0.0849255128 |
| C46 | -0.7721264965 | 4.5399224216  | -0.5163848365 |
| H47 | -1.3401665926 | 5.4684682985  | -0.6340809887 |
| C48 | -1.4846388906 | 3.2872657038  | -0.5614255491 |
| C49 | -2.8972667356 | 3.2003454069  | -0.6156989381 |
| H50 | -3.4934377334 | 4.1168880558  | -0.6708141500 |
| C51 | -3.5219875725 | 1.9644865556  | -0.5415954374 |
| H52 | -4.6169575534 | 1.9190381751  | -0.5228899069 |
| C53 | -2.8055573787 | 0.7335097662  | -0.4707518884 |
| C54 | -1.4045411880 | 0.7863914101  | -0.5351568583 |
| C55 | -0.7488223461 | 2.0633650447  | -0.5230229191 |
| C56 | -3.6296194420 | -0.5136138806 | -0.2554018554 |
| H57 | -3.0314150878 | -1.4307121655 | -0.2738565600 |
| H58 | -4.4240087766 | -0.6108668787 | -1.0152543150 |
| H59 | -4.1337714588 | -0.4625675455 | 0.7263829710  |
| H60 | 2.2905064963  | 3.0654364999  | -0.9916842857 |

### TS<sub>CHF</sub>, acetonitrile solution

file: nptc1\_7\_OHQP2\_Pf2\_H1transfer\_to\_P\_TS\_MeCN - TS Gauss

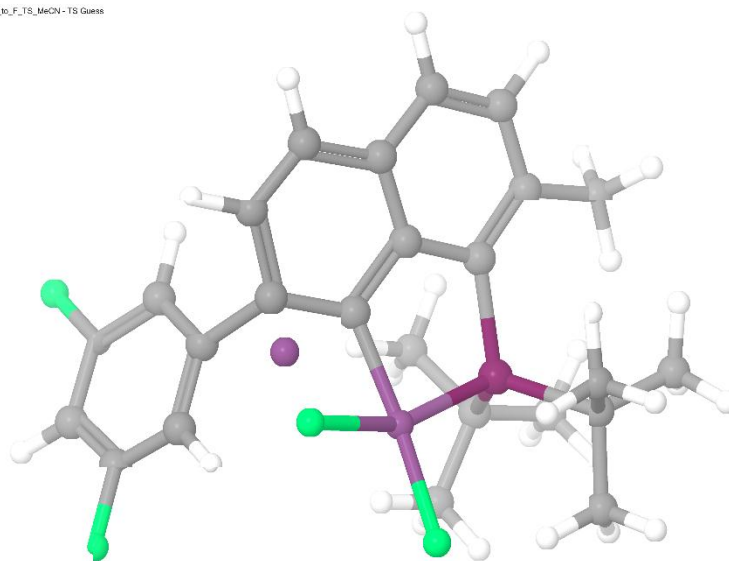

Total Gibbs free energy, G<sub>tot</sub> (H<sub>tot</sub> - T\*S): -1827.859203 hartrees

|     |               |               |               |
|-----|---------------|---------------|---------------|
| Pt1 | 1.7059690263  | 0.6564843421  | -1.0104223421 |
| P2  | -0.1500783912 | -0.5834672134 | -0.6986334306 |
| F3  | 2.9730473210  | 2.4353217287  | -1.6035655763 |
| F4  | 3.0511268395  | -0.5676087814 | -1.9644358370 |
| C5  | -0.3893044438 | -1.6493802118 | -2.2772514364 |
| C6  | -1.7288809385 | -2.3994442830 | -2.3998221943 |
| H7  | -1.6663838313 | -3.0299077040 | -3.3056804231 |
| H8  | -2.5773400232 | -1.7142353439 | -2.5422704963 |
| H9  | -1.9410847818 | -3.0694345427 | -1.5531788322 |
| C10 | -0.2735407628 | -0.6708724389 | -3.4676831603 |
| H11 | 0.7085145467  | -0.1727046137 | -3.4856736738 |
| H12 | -1.0599852124 | 0.1019085175  | -3.4434315764 |
| H13 | -0.3928087723 | -1.2469572530 | -4.4030325146 |

|     |               |               |               |
|-----|---------------|---------------|---------------|
| C14 | 0.7867108503  | -2.6519528188 | -2.3195628565 |
| H15 | 0.7622736093  | -3.1569991293 | -3.3027555303 |
| H16 | 0.6942133793  | -3.4361721253 | -1.5494703173 |
| H17 | 1.7581743258  | -2.1365121851 | -2.2169032962 |
| C18 | -0.0824114653 | -1.5590136442 | 0.9599023869  |
| C19 | 1.3878295522  | -1.9839356997 | 1.1732333733  |
| H20 | 1.4610981193  | -2.5198243219 | 2.1366051549  |
| H21 | 2.0489741843  | -1.1025181348 | 1.2075601453  |
| H22 | 1.7543869135  | -2.6566423099 | 0.3821550409  |
| C23 | -0.9832485353 | -2.8087790095 | 1.0106445737  |
| H24 | -0.7018016978 | -3.5617372942 | 0.2577100458  |
| H25 | -2.0539878572 | -2.5773171904 | 0.9016054695  |
| H26 | -0.8549794829 | -3.2763163299 | 2.0037890468  |
| C27 | -0.4843845181 | -0.5726874836 | 2.0763430964  |
| H28 | -1.5457780192 | -0.2834216639 | 2.0170786016  |
| H29 | 0.1283885608  | 0.3441080855  | 2.0532261142  |
| H30 | -0.3176539084 | -1.0644214772 | 3.0512263716  |
| C31 | 2.2629714212  | 3.2972896084  | 1.2536217521  |
| C32 | 3.6031917045  | 2.8726626505  | 1.1602982739  |
| H33 | 4.0243813910  | 2.5647927747  | 0.2014744474  |
| C34 | 4.3944425310  | 2.8656744733  | 2.3124998195  |
| C35 | 3.9311939783  | 3.2729105663  | 3.5671010120  |
| H36 | 4.5741027643  | 3.2659553823  | 4.4518799401  |
| C37 | 2.5988405682  | 3.6925410736  | 3.6224989241  |
| C38 | 1.7578605038  | 3.7133548156  | 2.5058080875  |
| H39 | 0.7220643119  | 4.0449382130  | 2.6202756203  |
| F40 | 5.6841034433  | 2.4549993737  | 2.2066538508  |
| F41 | 2.0980409842  | 4.0948666647  | 4.8185359963  |
| C42 | 0.6283789500  | 2.0960673986  | -0.3227474573 |
| C43 | 1.2995936217  | 3.3403378174  | 0.0629732207  |
| C44 | 0.4889496004  | 4.5619056059  | 0.0024596303  |
| H45 | 0.9889738094  | 5.5097342914  | 0.2357780277  |
| C46 | -0.8503294855 | 4.5417476463  | -0.2907829685 |
| H47 | -1.4279427650 | 5.4718691061  | -0.3432216295 |
| C48 | -1.5462561692 | 3.2885479310  | -0.4482160351 |
| C49 | -2.9584421546 | 3.1967864477  | -0.5513951549 |
| H50 | -3.5633908149 | 4.1112605910  | -0.5618427693 |
| C51 | -3.5709343755 | 1.9523852492  | -0.5836802759 |
| H52 | -4.6668174149 | 1.8964751495  | -0.6043514088 |
| C53 | -2.8445811182 | 0.7196618343  | -0.5649190057 |
| C54 | -1.4417477556 | 0.7862423868  | -0.5900892225 |
| C55 | -0.7984668609 | 2.0683959396  | -0.4837186607 |
| C56 | -3.6799439416 | -0.5332755771 | -0.4560576037 |
| H57 | -3.0831423435 | -1.4477030256 | -0.3731942529 |
| H58 | -4.3562630942 | -0.6410544571 | -1.3232337988 |
| H59 | -4.3230946197 | -0.4689004112 | 0.4403895686  |
| H60 | 2.1736580377  | 3.1583662821  | -0.9346507226 |

### TS<sub>CH-Pt</sub>, gas phase

Total Gibbs free energy, G<sub>tot</sub> (H<sub>tot</sub> - T\*S): -1727.505864 hartrees

|     |               |               |               |
|-----|---------------|---------------|---------------|
| Pt1 | 1.5490591304  | 0.2744005193  | 0.0862408394  |
| P2  | -0.4817582613 | -0.9578991473 | 0.1808761811  |
| F3  | 2.7236039249  | -1.3702501004 | -0.2871979418 |
| C4  | -0.6659115804 | -1.8865026310 | -1.4850895330 |
| C5  | -2.0445656121 | -2.5053189761 | -1.7673084842 |
| H6  | -2.0069505653 | -3.0040708670 | -2.7530078447 |
| H7  | -2.8378435588 | -1.7430015532 | -1.8144535255 |
| H8  | -2.3268093691 | -3.2704401980 | -1.0276365278 |
| C9  | -0.3744594591 | -0.8068739070 | -2.5542866571 |
| H10 | 0.6444987042  | -0.3924053372 | -2.4511801792 |
| H11 | -1.0918918127 | 0.0290863531  | -2.5124651041 |
| H12 | -0.4437988774 | -1.2690160947 | -3.5554702176 |
| C13 | 0.4446541180  | -2.9589603008 | -1.5411681019 |
| H14 | 0.5039528795  | -3.3463364336 | -2.5746021439 |
| H15 | 0.2248630767  | -3.8174872641 | -0.8858736219 |
| H16 | 1.4276722838  | -2.5380827168 | -1.2581579869 |
| C17 | -0.5392683941 | -2.0711784433 | 1.7511348939  |
| C18 | 0.9373698877  | -2.4000914470 | 2.0878083346  |
| H19 | 0.9610667111  | -3.1852723211 | 2.8647369329  |
| H20 | 1.4501129963  | -1.5092172895 | 2.4842142419  |
| H21 | 1.5281976788  | -2.7272287819 | 1.2185353865  |
| C22 | -1.3261550099 | -3.3881942748 | 1.6077404509  |
| H23 | -0.9019820185 | -4.0479256600 | 0.8358060794  |
| H24 | -2.3951194659 | -3.2398645419 | 1.3920150583  |
| H25 | -1.2663694667 | -3.9309940563 | 2.5684317199  |
| C26 | -1.1309345514 | -1.2218610567 | 2.8943328095  |
| H27 | -2.2065927610 | -1.0267643818 | 2.7652842401  |
| H28 | -0.6148603620 | -0.2518055037 | 2.9873124479  |
| H29 | -0.9943720189 | -1.7668949518 | 3.8454268370  |
| C30 | 2.4305913753  | 3.0761843289  | -0.1192125353 |
| C31 | 3.2601487314  | 4.1924925214  | -0.3234293980 |
| H32 | 2.8617115815  | 5.2009141345  | -0.4577382468 |
| C33 | 4.6448925872  | 3.9984129275  | -0.3568215707 |
| C34 | 5.2393300732  | 2.7453065760  | -0.1904960737 |
| H35 | 6.3242609247  | 2.6247920798  | -0.2069430642 |
| C36 | 4.3914595662  | 1.6461680001  | 0.0093247895  |
| C37 | 2.9999874349  | 1.7739892090  | 0.0165797052  |
| H38 | 2.1189767736  | 0.9592124508  | 1.3727001539  |
| F39 | 5.4470078065  | 5.0723068929  | -0.5466010735 |
| F40 | 4.9629497698  | 0.4414858066  | 0.1973891295  |
| C41 | 0.3406299227  | 1.8603816443  | 0.0793821173  |
| C42 | 0.9564258493  | 3.1160087684  | -0.0555097398 |
| C43 | 0.1544078499  | 4.2877909565  | -0.1370398754 |
| H44 | 0.6271480299  | 5.2685943792  | -0.2499173913 |
| C45 | -1.2259520014 | 4.1972471325  | -0.0705994476 |
| H46 | -1.8434997810 | 5.0997153241  | -0.1200410953 |
| C47 | -1.8738290419 | 2.9350542204  | 0.0663593116  |

|     |               |               |               |
|-----|---------------|---------------|---------------|
| C48 | -3.2861065261 | 2.8096994582  | 0.1548205942  |
| H49 | -3.9046401679 | 3.7128548020  | 0.1098808694  |
| C50 | -3.8738432345 | 1.5686274777  | 0.3045571394  |
| H51 | -4.9639920762 | 1.4914632255  | 0.3850619339  |
| C52 | -3.1119717991 | 0.3615213749  | 0.3561135377  |
| C53 | -1.7169478453 | 0.4407205687  | 0.2461597363  |
| C54 | -1.0789800350 | 1.7325594749  | 0.1295132957  |
| C55 | -3.8988732051 | -0.9108351234 | 0.5634391646  |
| H56 | -3.2784291240 | -1.8113881286 | 0.5022832519  |
| H57 | -4.7037440604 | -1.0054556864 | -0.1860597149 |
| H58 | -4.3892734851 | -0.9039638403 | 1.5537308845  |

### TS<sub>CH-Pt</sub>, acetonitrile solution

Title: nphh\_7\_084F2\_H\_PIF\_OA\_TS\_MuCN - TS Guess

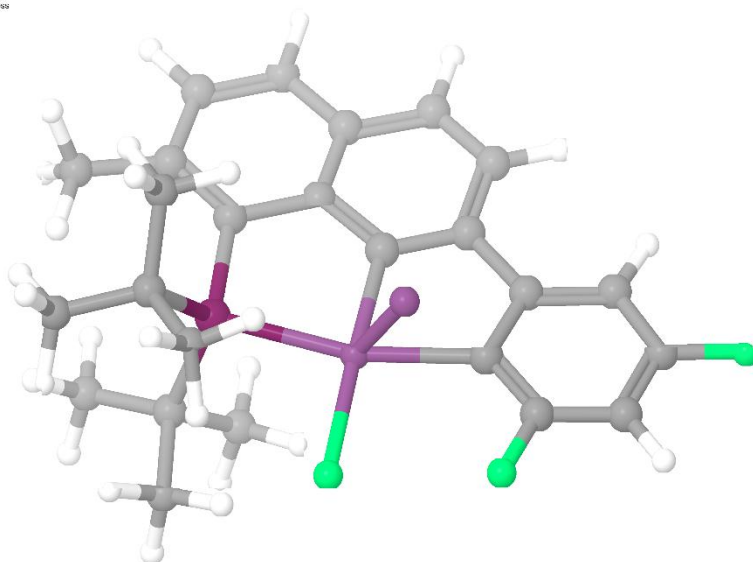

Total Gibbs free energy, G<sub>tot</sub> (H<sub>tot</sub> - T\*S): -1727.526026 hartrees

|     |               |               |               |
|-----|---------------|---------------|---------------|
| Pt1 | 1.5544667779  | 0.2661696652  | 0.0823796195  |
| P2  | -0.4920674924 | -0.9669257290 | 0.1774284194  |
| F3  | 2.7968949545  | -1.3658454012 | -0.3030476785 |
| C4  | -0.6736640264 | -1.8970012285 | -1.4891039367 |
| C5  | -2.0489300453 | -2.5250403146 | -1.7723375673 |
| H6  | -2.0013809956 | -3.0259248298 | -2.7571968762 |
| H7  | -2.8457869468 | -1.7667500680 | -1.8279939216 |
| H8  | -2.3304358978 | -3.2889257899 | -1.0307069883 |
| C9  | -0.3861140716 | -0.8195614192 | -2.5620475308 |
| H10 | 0.6226542547  | -0.3813822980 | -2.4440341182 |
| H11 | -1.1216631590 | 0.0015357205  | -2.5378315194 |
| H12 | -0.4302163505 | -1.2889959213 | -3.5616563990 |
| C13 | 0.4403941371  | -2.9673418225 | -1.5367373883 |
| H14 | 0.5001597396  | -3.3605732036 | -2.5684121995 |
| H15 | 0.2227614522  | -3.8212920825 | -0.8740370865 |
| H16 | 1.4215801171  | -2.5411870767 | -1.2578745623 |
| C17 | -0.5514964760 | -2.0668182903 | 1.7617933429  |
| C18 | 0.9212132788  | -2.4068047278 | 2.0988920471  |



|     |               |               |               |
|-----|---------------|---------------|---------------|
| H19 | 0.9380104071  | -3.1385236818 | 2.9269015638  |
| H20 | 1.4612447032  | -1.5022449601 | 2.4227832386  |
| H21 | 1.4792876565  | -2.8180297295 | 1.2441905364  |
| C22 | -1.3518833494 | -3.3780723521 | 1.6332308446  |
| H23 | -0.9369661803 | -4.0522777559 | 0.8677449597  |
| H24 | -2.4201727458 | -3.2216198744 | 1.4199729643  |
| H25 | -1.2930318117 | -3.9083805758 | 2.6016174215  |
| C26 | -1.1289714314 | -1.1989702190 | 2.8994677908  |
| H27 | -2.2024876153 | -0.9927276991 | 2.7700956969  |
| H28 | -0.5995748843 | -0.2345779265 | 2.9837387647  |
| H29 | -0.9989518419 | -1.7381508462 | 3.8552313319  |
| C30 | 2.4281839338  | 3.0766243464  | -0.1001410186 |
| C31 | 3.2475891533  | 4.2023758967  | -0.3062798160 |
| H32 | 2.8400657348  | 5.2098212579  | -0.4347334900 |
| C33 | 4.6342562172  | 4.0188991042  | -0.3501302786 |
| C34 | 5.2470080604  | 2.7722519340  | -0.1947020452 |
| H35 | 6.3353519399  | 2.6622902410  | -0.2191347063 |
| C36 | 4.4032256615  | 1.6695046387  | 0.0048767226  |
| C37 | 3.0094248361  | 1.7765178767  | 0.0256802455  |
| H38 | 2.1749150492  | 0.9255440294  | 1.3644451022  |
| F39 | 5.4246493507  | 5.1037123510  | -0.5426692934 |
| F40 | 4.9912412073  | 0.4624569776  | 0.1804110456  |
| C41 | 0.3396743097  | 1.8506104049  | 0.0963980137  |
| C42 | 0.9539772991  | 3.1098192546  | -0.0291352563 |
| C43 | 0.1549233065  | 4.2869598616  | -0.1001107461 |
| H44 | 0.6286825685  | 5.2699542981  | -0.2036895802 |
| C45 | -1.2263381364 | 4.1972333686  | -0.0354784400 |
| H46 | -1.8434750593 | 5.1018584331  | -0.0779715696 |
| C47 | -1.8743093598 | 2.9321433382  | 0.0892221593  |
| C48 | -3.2902237672 | 2.8138457361  | 0.1723962309  |
| H49 | -3.9055870817 | 3.7213944391  | 0.1328317784  |
| C50 | -3.8815452456 | 1.5721917473  | 0.3102089700  |
| H51 | -4.9733093948 | 1.4967598441  | 0.3874202668  |
| C52 | -3.1222794796 | 0.3596128704  | 0.3539816967  |
| C53 | -1.7247104460 | 0.4351953518  | 0.2464997198  |
| C54 | -1.0822180545 | 1.7260487727  | 0.1432220841  |
| C55 | -3.9208318569 | -0.9068891989 | 0.5508350692  |
| H56 | -3.3120289902 | -1.8151108453 | 0.4849198988  |
| H57 | -4.7261040863 | -0.9843896197 | -0.2011270348 |
| H58 | -4.4140713571 | -0.8980173307 | 1.5407438391  |

## References

1. Parr, R.G.; Yang, W. *Density-functional Theory of Atoms and Molecules*; Oxford University Press: Oxford, 1989.
2. Perdew, J.P. ; Burke, K.; Ernzerhof, M. *Phys. Rev. Lett.* **1996**, *77*, 3865-8.
3. Jaguar, version 7.9, Schrödinger, LLC, New York, NY, 2012.
4. *CRC Handbook of Chemistry and Physics*, 92nd Ed, 2011.
5. Solomonov, B.N. Private communication.
6. M. Shinya, I. Hideyuki EP1473297 (A1) – 2004-11-03
